# Supplementary material for: Comparative physiological, transcriptomic, and WGCNA analyses reveal the key genes and regulatory pathways associated with drought tolerance in Tartary buckwheat
Source: Front Plant Sci. 2022 Oct 3;13:985088. doi: 10.3389/fpls.2022.985088 (PMC9575659; doi:10.3389/fpls.2022.985088)
Supplement: Supplementary file 4 [file Table_2.xlsx]

## Sheet: Sheet1
Table S2. Overview of the sequencing results of 30 samples
Samples	Raw reads	Raw bases	Clean reads	Clean bases	GC Content (%)	Q30 percentage (%)	Total_Mapped	Multiple_Mapped	Uniquely_Mapped
LK0_1	46502166	6975324900	41009486	6151422900	48.25	93.91	38934849 (94.94%)	7465611 (19.17%)	31469238 (80.83%)
LK0_2	41525330	6228799500	37603704	5640555600	45.59	93.32	35896589 (95.46%)	1029801 (2.87%)	34866788 (97.13%)
LK0_3	45737550	6860632500	41790252	6268537800	45.57	93.32	39929680 (95.55%)	1109418 (2.78%)	38820262 (97.22%)
XZ0_1	45735846	6860376900	40095860	6014379000	45.7	93.68	37798171 (94.27%)	8274312 (21.89%)	29523859 (78.11%)
XZ0_2	44576846	6686526900	40592910	6088936500	45.89	93.16	38673003 (95.27%)	1441555 (3.73%)	37231448 (96.27%)
XZ0_3	43280988	6492148200	39665816	5949872400	45.76	92.99	37813287 (95.33%)	1301940 (3.44%)	36511347 (96.56%)
LK3_1	46251400	6937710000	42196682	6329502300	46.06	93.1	40247739 (95.38%)	1360462 (3.38%)	38887277 (96.62%)
LK3_2	44773492	6716023800	40965080	6144762000	45.98	93.74	39115176 (95.48%)	1889825 (4.83%)	37225351 (95.17%)
LK3_3	44192648	6628897200	40378060	6056709000	45.95	93.72	38536688 (95.44%)	1638198 (4.25%)	36898490 (95.75%)
XZ3_1	46381638	6957245700	42467682	6370152300	45.78	93.25	40499312 (95.37%)	1149877 (2.84%)	39349435 (97.16%)
XZ3_2	44808040	6721206000	41149794	6172469100	45.7	93.36	39358068 (95.65%)	1124216 (2.86%)	38233852 (97.14%)
XZ3_3	43261386	6489207900	39414756	5912213400	45.5	92.49	37514512 (95.18%)	1110396 (2.96%)	36404116 (97.04%)
LK5_1	42228794	6334319100	38356894	5753534100	46.91	92.83	36615010 (95.46%)	1267410 (3.46%)	35347600 (96.54%)
LK5_2	42334480	6350172000	38972242	5845836300	46.66	92.56	37136685 (95.29%)	1726211 (4.65%)	35410474 (95.35%)
LK5_3	44330238	6649535700	40433470	6065020500	46.49	92.96	38650993 (95.59%)	1003763 (2.60%)	37647230 (97.40%)
XZ5_1	43772516	6565877400	40249510	6037426500	48.81	93.22	38241731 (95.01%)	1398695 (3.66%)	36843036 (96.34%)
XZ5_2	41966424	6294963600	38245322	5736798300	45.87	93.24	36448936 (95.30%)	1523298 (4.18%)	34925638 (95.82%)
XZ5_3	48523050	7278457500	44195368	6629305200	45.94	93.28	40748605 (92.20%)	1246729 (3.06%)	39501876 (96.94%)
LK7_1	49258908	7388836200	44796372	6719455800	45.74	93.51	42617472 (95.14%)	1675120 (3.93%)	40942352 (96.07%)
LK7_2	45110750	6766612500	40887226	6133083900	45.7	93.06	39040249 (95.48%)	1374824 (3.52%)	37665425 (96.48%)
LK7_3	50496276	7574441400	45612192	6841828800	45.7	93.07	43585310 (95.56%)	1412110 (3.24%)	42173200 (96.76%)
XZ7_1	48555248	7283287200	43228352	6484252800	45.82	93.02	41193954 (95.29%)	1129693 (2.74%)	40064261 (97.26%)
XZ7_2	42049082	6307362300	38297532	5744629800	45.86	92.75	36561183 (95.47%)	1271655 (3.48%)	35289528 (96.52%)
XZ7_3	44407404	6661110600	40216224	6032433600	45.56	92.7	38232381 (95.07%)	1472766 (3.85%)	36759615 (96.15%)
LKR_1	40384216	6057632400	36424822	5463723300	45.59	90.83	34634653 (95.09%)	1662952 (4.80%)	32971701 (95.20%)
LKR_2	42078734	6311810100	38270694	5740604100	45.47	93.26	36644451 (95.75%)	1492615 (4.07%)	35151836 (95.93%)
LKR_3	44105362	6615804300	40358668	6053800200	45.64	93.38	38596822 (95.63%)	2171248 (5.63%)	36425574 (94.37%)
XZR_1	41070548	6160582200	37621504	5643225600	46.5	93.63	36067473 (95.87%)	1395765 (3.87%)	34671708 (96.13%)
XZR_2	46481594	6972239100	42230660	6334599000	46.3	92.81	39859900 (94.39%)	1661536 (4.17%)	38198364 (95.83%)
XZR_3	45977954	6896693100	42113330	6316999500	46.68	93.67	40430977 (96.01%)	2610002 (6.46%)	37820975 (93.54%)
Average	44671964	6700794540	40594682	6089202320	46.09	93.13	38654129 (95.23%)	1879733 (4.88%)	36774395 (95.12%)
