# Supplementary material for: Comparative physiological, transcriptomic, and WGCNA analyses reveal the key genes and regulatory pathways associated with drought tolerance in Tartary buckwheat
Source: Front Plant Sci. 2022 Oct 3;13:985088. doi: 10.3389/fpls.2022.985088 (PMC9575659; doi:10.3389/fpls.2022.985088)
Supplement: Supplementary file 5 [file Table_3.xlsx]

## Sheet: Sheet1
Table S3 Gene Ontology enrichment analysis of the up- and -down regulated drought response genes of LK3 vs XZSN
Class	GO_Name	GO_ID	GO_Level	P_value	EnrichmentScore	HitsGenesCountsInSelectedSet	HitsGenesCountsInBackground	AllGenesCountsInSelectedSet	AllGenesCountsInBackground	GenesOfSelectedSetInGOterm
Up-regulated genes
Molecular function	transaminase activity	GO:0008483	5	0.00056821	3.75566	9	58	443	10722	FtPinG0004264900.01.T01,FtPinG0001244600.01.T01,FtPinG0001083800.01.T01,FtPinG0003181300.01.T01,FtPinG0003294300.01.T01,FtPinG0001005900.01.T01,FtPinG0009549300.01.T01,FtPinG0005753100.01.T01,FtPinG0009276300.01.T01,
Molecular function	transferase activity, transferring nitrogenous groups	GO:0016769	4	0.00056821	3.75566	9	58	443	10722	FtPinG0004264900.01.T01,FtPinG0001244600.01.T01,FtPinG0001083800.01.T01,FtPinG0003181300.01.T01,FtPinG0003294300.01.T01,FtPinG0001005900.01.T01,FtPinG0009549300.01.T01,FtPinG0005753100.01.T01,FtPinG0009276300.01.T01,
Molecular function	small molecule binding	GO:0036094	3	0.000924037	1.76211	34	467	443	10722	FtPinG0007990400.01.T01,FtPinG0007096000.01.T01,FtPinG0009322000.01.T01,FtPinG0005565800.01.T01,FtPinG0002668400.01.T01,FtPinG0001223800.01.T01,FtPinG0007802900.01.T01,FtPinG0007802700.01.T01,FtPinG0000286700.01.T01,FtPinG0009214900.01.T01,FtPinG0002364100.01.T01,FtPinG0000035900.01.T01,FtPinG0005725200.01.T01,FtPinG0001411800.01.T01,FtPinG0001005900.01.T01,FtPinG0009429700.01.T01,FtPinG000261980…
Molecular function	ion binding	GO:0043167	3	0.00109257	1.48084	61	997	443	10722	FtPinG0002352100.01.T01,FtPinG0005728400.01.T01,FtPinG0004269300.01.T01,FtPinG0007990400.01.T01,FtPinG0007096000.01.T01,FtPinG0009322000.01.T01,FtPinG0009572900.01.T01,FtPinG0005565800.01.T01,FtPinG0002668400.01.T01,FtPinG0002105000.01.T01,FtPinG0001223800.01.T01,FtPinG0007802900.01.T01,FtPinG0007802700.01.T01,FtPinG0001405800.01.T01,FtPinG0008425900.01.T01,FtPinG0009214900.01.T01,FtPinG000236410…
Molecular function	nucleotide binding	GO:0000166	5	0.00109365	1.86691	28	363	443	10722	FtPinG0007096000.01.T01,FtPinG0009322000.01.T01,FtPinG0005565800.01.T01,FtPinG0001223800.01.T01,FtPinG0007802900.01.T01,FtPinG0000286700.01.T01,FtPinG0009214900.01.T01,FtPinG0002364100.01.T01,FtPinG0000035900.01.T01,FtPinG0005725200.01.T01,FtPinG0001411800.01.T01,FtPinG0009429700.01.T01,FtPinG0002619800.01.T01,FtPinG0008850600.01.T01,FtPinG0003120300.01.T01,FtPinG0009549300.01.T01,FtPinG000675390…
Molecular function	nucleoside phosphate binding	GO:1901265	4	0.00109365	1.86691	28	363	443	10722	FtPinG0007096000.01.T01,FtPinG0009322000.01.T01,FtPinG0005565800.01.T01,FtPinG0001223800.01.T01,FtPinG0007802900.01.T01,FtPinG0000286700.01.T01,FtPinG0009214900.01.T01,FtPinG0002364100.01.T01,FtPinG0000035900.01.T01,FtPinG0005725200.01.T01,FtPinG0001411800.01.T01,FtPinG0009429700.01.T01,FtPinG0002619800.01.T01,FtPinG0008850600.01.T01,FtPinG0003120300.01.T01,FtPinG0009549300.01.T01,FtPinG000675390…
Molecular function	anion binding	GO:0043168	4	0.00115822	1.69285	37	529	443	10722	FtPinG0007990400.01.T01,FtPinG0007096000.01.T01,FtPinG0009322000.01.T01,FtPinG0005565800.01.T01,FtPinG0002668400.01.T01,FtPinG0002105000.01.T01,FtPinG0001223800.01.T01,FtPinG0007802900.01.T01,FtPinG0007802700.01.T01,FtPinG0001405800.01.T01,FtPinG0009214900.01.T01,FtPinG0002364100.01.T01,FtPinG0000035900.01.T01,FtPinG0005725200.01.T01,FtPinG0007325700.01.T01,FtPinG0001005900.01.T01,FtPinG000942970…
Molecular function	purine nucleotide binding	GO:0017076	6	0.00625613	1.87698	19	245	443	10722	FtPinG0007096000.01.T01,FtPinG0009322000.01.T01,FtPinG0005565800.01.T01,FtPinG0001223800.01.T01,FtPinG0007802900.01.T01,FtPinG0000035900.01.T01,FtPinG0005725200.01.T01,FtPinG0009429700.01.T01,FtPinG0002619800.01.T01,FtPinG0008850600.01.T01,FtPinG0003120300.01.T01,FtPinG0009549300.01.T01,FtPinG0004387600.01.T01,FtPinG0007085200.01.T01,FtPinG0008630800.01.T01,FtPinG0004338500.01.T01,FtPinG000758780…
Molecular function	purine ribonucleotide binding	GO:0032555	7	0.00625613	1.87698	19	245	443	10722	FtPinG0007096000.01.T01,FtPinG0009322000.01.T01,FtPinG0005565800.01.T01,FtPinG0001223800.01.T01,FtPinG0007802900.01.T01,FtPinG0000035900.01.T01,FtPinG0005725200.01.T01,FtPinG0009429700.01.T01,FtPinG0002619800.01.T01,FtPinG0008850600.01.T01,FtPinG0003120300.01.T01,FtPinG0009549300.01.T01,FtPinG0004387600.01.T01,FtPinG0007085200.01.T01,FtPinG0008630800.01.T01,FtPinG0004338500.01.T01,FtPinG000758780…
Molecular function	oxidoreductase activity	GO:0016491	3	0.00734225	1.39485	54	937	443	10722	FtPinG0008935500.01.T01,FtPinG0005613800.01.T01,FtPinG0003223000.01.T01,FtPinG0002378800.01.T01,FtPinG0001861600.01.T01,FtPinG0006603600.01.T01,FtPinG0003233400.01.T01,FtPinG0007754400.01.T01,FtPinG0000246400.01.T01,FtPinG0004548300.01.T01,FtPinG0005880800.01.T01,FtPinG0006352600.01.T01,FtPinG0006479000.01.T01,FtPinG0002747100.01.T01,FtPinG0001088000.01.T01,FtPinG0002952800.01.T01,FtPinG000213020…
Molecular function	DNA-binding transcription factor activity	GO:0003700	3	0.00844105	1.32727	68	1240	443	10722	FtPinG0007888700.01.T01,FtPinG0001212400.01.T01,FtPinG0002272200.01.T01,FtPinG0005108300.01.T01,FtPinG0009424400.01.T01,FtPinG0007464600.01.T01,FtPinG0007039000.01.T01,FtPinG0006087500.01.T01,FtPinG0004666000.01.T01,FtPinG0000334100.01.T01,FtPinG0006575700.01.T01,FtPinG0001302000.01.T01,FtPinG0003915400.01.T01,FtPinG0002336700.01.T01,FtPinG0008662700.01.T01,FtPinG0003050700.01.T01,FtPinG000660220…
Molecular function	ribonucleotide binding	GO:0032553	6	0.00907717	1.81047	19	254	443	10722	FtPinG0007096000.01.T01,FtPinG0009322000.01.T01,FtPinG0005565800.01.T01,FtPinG0001223800.01.T01,FtPinG0007802900.01.T01,FtPinG0000035900.01.T01,FtPinG0005725200.01.T01,FtPinG0009429700.01.T01,FtPinG0002619800.01.T01,FtPinG0008850600.01.T01,FtPinG0003120300.01.T01,FtPinG0009549300.01.T01,FtPinG0004387600.01.T01,FtPinG0007085200.01.T01,FtPinG0008630800.01.T01,FtPinG0004338500.01.T01,FtPinG000758780…
Molecular function	oxidoreductase activity, acting on paired donors, with incorporation or reduction of molecular oxygen	GO:0016705	4	0.0104564	1.89829	16	204	443	10722	FtPinG0002378800.01.T01,FtPinG0001861600.01.T01,FtPinG0003233400.01.T01,FtPinG0007754400.01.T01,FtPinG0003079800.01.T01,FtPinG0003175900.01.T01,FtPinG0003448100.01.T01,FtPinG0008694700.01.T01,FtPinG0003111900.01.T01,FtPinG0008251700.01.T01,FtPinG0009432900.01.T01,FtPinG0001233600.01.T01,FtPinG0007406000.01.T01,FtPinG0006446600.01.T01,FtPinG0003229300.01.T01,FtPinG0002724300.01.T01,
Molecular function	carbohydrate derivative binding	GO:0097367	3	0.014068	1.70445	20	284	443	10722	FtPinG0007096000.01.T01,FtPinG0009322000.01.T01,FtPinG0005565800.01.T01,FtPinG0001223800.01.T01,FtPinG0005946100.01.T01,FtPinG0007802900.01.T01,FtPinG0000035900.01.T01,FtPinG0005725200.01.T01,FtPinG0009429700.01.T01,FtPinG0002619800.01.T01,FtPinG0008850600.01.T01,FtPinG0003120300.01.T01,FtPinG0009549300.01.T01,FtPinG0004387600.01.T01,FtPinG0007085200.01.T01,FtPinG0008630800.01.T01,FtPinG000433850…
Molecular function	obsolete drug binding	GO:0008144	0	0.0148722	1.72232	19	267	443	10722	FtPinG0009322000.01.T01,FtPinG0003141500.01.T01,FtPinG0005946100.01.T01,FtPinG0007802900.01.T01,FtPinG0000035900.01.T01,FtPinG0005725200.01.T01,FtPinG0002640200.01.T01,FtPinG0001005900.01.T01,FtPinG0009429700.01.T01,FtPinG0008850600.01.T01,FtPinG0003120300.01.T01,FtPinG0009549300.01.T01,FtPinG0002611800.01.T01,FtPinG0004387600.01.T01,FtPinG0007085200.01.T01,FtPinG0008630800.01.T01,FtPinG000575310…
Molecular function	acyltransferase activity, transferring groups other than amino-acyl groups	GO:0016747	5	0.0158645	1.77351	17	232	443	10722	FtPinG0008143300.01.T01,FtPinG0006100300.01.T01,FtPinG0003125400.01.T01,FtPinG0006486100.01.T01,FtPinG0005996500.01.T01,FtPinG0005978600.01.T01,FtPinG0003454000.01.T01,FtPinG0000869800.01.T01,FtPinG0005730500.01.T01,FtPinG0001508400.01.T01,FtPinG0005533300.01.T01,FtPinG0009107500.01.T01,FtPinG0000544600.01.T01,FtPinG0002362600.01.T01,FtPinG0000639900.01.T01,FtPinG0005712200.01.T01,FtPinG000746090…
Molecular function	galactosyltransferase activity	GO:0008378	6	0.0192042	3.18463	5	38	443	10722	FtPinG0000176500.01.T01,FtPinG0000244500.01.T01,FtPinG0008416400.01.T01,FtPinG0007461700.01.T01,FtPinG0002370000.01.T01,
Molecular function	O-acyltransferase activity	GO:0008374	6	0.0235994	2.15672	9	101	443	10722	FtPinG0008143300.01.T01,FtPinG0003125400.01.T01,FtPinG0005978600.01.T01,FtPinG0000869800.01.T01,FtPinG0005730500.01.T01,FtPinG0001508400.01.T01,FtPinG0009107500.01.T01,FtPinG0000639900.01.T01,FtPinG0007460900.01.T01,
Molecular function	transcription regulator activity	GO:0140110	2	0.0263686	1.25377	69	1332	443	10722	FtPinG0007888700.01.T01,FtPinG0001212400.01.T01,FtPinG0002272200.01.T01,FtPinG0005108300.01.T01,FtPinG0009424400.01.T01,FtPinG0007464600.01.T01,FtPinG0007039000.01.T01,FtPinG0006087500.01.T01,FtPinG0004666000.01.T01,FtPinG0000334100.01.T01,FtPinG0006092000.01.T01,FtPinG0006575700.01.T01,FtPinG0001302000.01.T01,FtPinG0003915400.01.T01,FtPinG0002336700.01.T01,FtPinG0008662700.01.T01,FtPinG000305070…
Molecular function	adenyl ribonucleotide binding	GO:0032559	8	0.0269697	1.77405	14	191	443	10722	FtPinG0009322000.01.T01,FtPinG0005565800.01.T01,FtPinG0007802900.01.T01,FtPinG0000035900.01.T01,FtPinG0005725200.01.T01,FtPinG0009429700.01.T01,FtPinG0008850600.01.T01,FtPinG0003120300.01.T01,FtPinG0009549300.01.T01,FtPinG0004387600.01.T01,FtPinG0007085200.01.T01,FtPinG0008630800.01.T01,FtPinG0007587800.01.T01,FtPinG0008850400.01.T01,
Molecular function	adenyl nucleotide binding	GO:0030554	7	0.0269697	1.77405	14	191	443	10722	FtPinG0009322000.01.T01,FtPinG0005565800.01.T01,FtPinG0007802900.01.T01,FtPinG0000035900.01.T01,FtPinG0005725200.01.T01,FtPinG0009429700.01.T01,FtPinG0008850600.01.T01,FtPinG0003120300.01.T01,FtPinG0009549300.01.T01,FtPinG0004387600.01.T01,FtPinG0007085200.01.T01,FtPinG0008630800.01.T01,FtPinG0007587800.01.T01,FtPinG0008850400.01.T01,
Molecular function	oxidoreductase activity, acting on the aldehyde or oxo group of donors	GO:0016903	4	0.027303	2.5932	6	56	443	10722	FtPinG0008935500.01.T01,FtPinG0002747100.01.T01,FtPinG0001088000.01.T01,FtPinG0001003800.01.T01,FtPinG0005721000.01.T01,FtPinG0001471600.01.T01,
Molecular function	monooxygenase activity	GO:0004497	4	0.0293975	1.79795	13	175	443	10722	FtPinG0002378800.01.T01,FtPinG0001861600.01.T01,FtPinG0007754400.01.T01,FtPinG0006479000.01.T01,FtPinG0003079800.01.T01,FtPinG0003175900.01.T01,FtPinG0003448100.01.T01,FtPinG0008694700.01.T01,FtPinG0003111900.01.T01,FtPinG0009432900.01.T01,FtPinG0001233600.01.T01,FtPinG0006446600.01.T01,FtPinG0002724300.01.T01,
Molecular function	antiporter activity	GO:0015297	6	0.030651	2.32085	7	73	443	10722	FtPinG0003934600.01.T01,FtPinG0004377600.01.T01,FtPinG0003471400.01.T01,FtPinG0009492400.01.T01,FtPinG0008173500.01.T01,FtPinG0008353400.01.T01,FtPinG0009085700.01.T01,
Molecular function	acyltransferase activity	GO:0016746	4	0.0322402	1.63275	17	252	443	10722	FtPinG0008143300.01.T01,FtPinG0006100300.01.T01,FtPinG0003125400.01.T01,FtPinG0006486100.01.T01,FtPinG0005996500.01.T01,FtPinG0005978600.01.T01,FtPinG0003454000.01.T01,FtPinG0000869800.01.T01,FtPinG0005730500.01.T01,FtPinG0001508400.01.T01,FtPinG0005533300.01.T01,FtPinG0009107500.01.T01,FtPinG0000544600.01.T01,FtPinG0002362600.01.T01,FtPinG0000639900.01.T01,FtPinG0005712200.01.T01,FtPinG000746090…
Molecular function	transferase activity	GO:0016740	3	0.0356877	1.15082	128	2692	443	10722	FtPinG0008435500.01.T01,FtPinG0004269300.01.T01,FtPinG0009108000.01.T01,FtPinG0004264900.01.T01,FtPinG0008141700.01.T01,FtPinG0009633900.01.T01,FtPinG0002511700.01.T01,FtPinG0003092800.01.T01,FtPinG0008143300.01.T01,FtPinG0009572900.01.T01,FtPinG0005565800.01.T01,FtPinG0008534800.01.T01,FtPinG0005751900.01.T01,FtPinG0006100300.01.T01,FtPinG0006326300.01.T01,FtPinG0002245700.01.T01,FtPinG000003560…
Molecular function	purine ribonucleoside triphosphate binding	GO:0035639	5	0.0367385	1.66536	15	218	443	10722	FtPinG0007096000.01.T01,FtPinG0001223800.01.T01,FtPinG0007802900.01.T01,FtPinG0000035900.01.T01,FtPinG0005725200.01.T01,FtPinG0009429700.01.T01,FtPinG0002619800.01.T01,FtPinG0008850600.01.T01,FtPinG0009549300.01.T01,FtPinG0004387600.01.T01,FtPinG0008630800.01.T01,FtPinG0004338500.01.T01,FtPinG0007587800.01.T01,FtPinG0007531800.01.T01,FtPinG0008850400.01.T01,
Molecular function	carboxy-lyase activity	GO:0016831	5	0.0370256	2.68924	5	45	443	10722	FtPinG0004064400.01.T01,FtPinG0009214900.01.T01,FtPinG0001411800.01.T01,FtPinG0005943500.01.T01,FtPinG0007962000.01.T01,
Cellular component	cytoplasmic side of membrane	GO:0098562	4	0.00212138	3.81963	7	46	498	12500	FtPinG0000345500.01.T01,FtPinG0000974900.01.T01,FtPinG0001209700.01.T01,FtPinG0007501100.01.T01,FtPinG0002619800.01.T01,FtPinG0002262100.01.T01,FtPinG0001100200.01.T01,
Cellular component	mitochondrial matrix	GO:0005759	6	0.00500938	2.46522	11	112	498	12500	FtPinG0002747100.01.T01,FtPinG0001088000.01.T01,FtPinG0002547200.01.T01,FtPinG0005721000.01.T01,FtPinG0001005900.01.T01,FtPinG0007768700.01.T01,FtPinG0001476300.01.T01,FtPinG0009711100.01.T01,FtPinG0007587800.01.T01,FtPinG0007162600.01.T01,FtPinG0006872800.01.T01,
Cellular component	obsolete membrane part	GO:0044425	0	0.0070887	1.31561	76	1450	498	12500	FtPinG0000345500.01.T01,FtPinG0008141700.01.T01,FtPinG0004377600.01.T01,FtPinG0009572900.01.T01,FtPinG0007884200.01.T01,FtPinG0000129600.01.T01,FtPinG0005717800.01.T01,FtPinG0002105000.01.T01,FtPinG0000580500.01.T01,FtPinG0008578300.01.T01,FtPinG0006978500.01.T01,FtPinG0000543600.01.T01,FtPinG0005880800.01.T01,FtPinG0001244600.01.T01,FtPinG0001940300.01.T01,FtPinG0001405800.01.T01,FtPinG000662980…
Cellular component	intrinsic component of membrane	GO:0031224	3	0.00725928	1.42682	49	862	498	12500	FtPinG0000345500.01.T01,FtPinG0004377600.01.T01,FtPinG0009572900.01.T01,FtPinG0007884200.01.T01,FtPinG0000129600.01.T01,FtPinG0005717800.01.T01,FtPinG0008578300.01.T01,FtPinG0006978500.01.T01,FtPinG0000543600.01.T01,FtPinG0001940300.01.T01,FtPinG0006629800.01.T01,FtPinG0000974900.01.T01,FtPinG0000374400.01.T01,FtPinG0001693600.01.T01,FtPinG0006867700.01.T01,FtPinG0004464600.01.T01,FtPinG000162410…
Cellular component	side of membrane	GO:0098552	3	0.00868385	2.97801	7	59	498	12500	FtPinG0000345500.01.T01,FtPinG0000974900.01.T01,FtPinG0001209700.01.T01,FtPinG0007501100.01.T01,FtPinG0002619800.01.T01,FtPinG0002262100.01.T01,FtPinG0001100200.01.T01,
Cellular component	obsolete endoplasmic reticulum part	GO:0044432	0	0.0124479	1.58344	27	428	498	12500	FtPinG0000345500.01.T01,FtPinG0008141700.01.T01,FtPinG0005191900.01.T01,FtPinG0000580500.01.T01,FtPinG0005880800.01.T01,FtPinG0001244600.01.T01,FtPinG0000974900.01.T01,FtPinG0005881100.01.T01,FtPinG0009513200.01.T01,FtPinG0009513400.01.T01,FtPinG0007769400.01.T01,FtPinG0003316500.01.T01,FtPinG0008231400.01.T01,FtPinG0008145300.01.T01,FtPinG0007325700.01.T01,FtPinG0000837800.01.T01,FtPinG000942970…
Cellular component	endoplasmic reticulum membrane	GO:0005789	5	0.016605	1.59368	24	378	498	12500	FtPinG0000345500.01.T01,FtPinG0008141700.01.T01,FtPinG0000580500.01.T01,FtPinG0005880800.01.T01,FtPinG0001244600.01.T01,FtPinG0000974900.01.T01,FtPinG0005881100.01.T01,FtPinG0009513200.01.T01,FtPinG0009513400.01.T01,FtPinG0007769400.01.T01,FtPinG0003316500.01.T01,FtPinG0008231400.01.T01,FtPinG0008145300.01.T01,FtPinG0007325700.01.T01,FtPinG0000837800.01.T01,FtPinG0003128500.01.T01,FtPinG000561880…
Cellular component	nuclear outer membrane-endoplasmic reticulum membrane network	GO:0042175	4	0.0180948	1.58113	24	381	498	12500	FtPinG0000345500.01.T01,FtPinG0008141700.01.T01,FtPinG0000580500.01.T01,FtPinG0005880800.01.T01,FtPinG0001244600.01.T01,FtPinG0000974900.01.T01,FtPinG0005881100.01.T01,FtPinG0009513200.01.T01,FtPinG0009513400.01.T01,FtPinG0007769400.01.T01,FtPinG0003316500.01.T01,FtPinG0008231400.01.T01,FtPinG0008145300.01.T01,FtPinG0007325700.01.T01,FtPinG0000837800.01.T01,FtPinG0003128500.01.T01,FtPinG000561880…
Cellular component	endoplasmic reticulum subcompartment	GO:0098827	4	0.0202427	1.5647	24	385	498	12500	FtPinG0000345500.01.T01,FtPinG0008141700.01.T01,FtPinG0000580500.01.T01,FtPinG0005880800.01.T01,FtPinG0001244600.01.T01,FtPinG0000974900.01.T01,FtPinG0005881100.01.T01,FtPinG0009513200.01.T01,FtPinG0009513400.01.T01,FtPinG0007769400.01.T01,FtPinG0003316500.01.T01,FtPinG0008231400.01.T01,FtPinG0008145300.01.T01,FtPinG0007325700.01.T01,FtPinG0000837800.01.T01,FtPinG0003128500.01.T01,FtPinG000561880…
Cellular component	membrane	GO:0016020	3	0.0264601	1.10812	218	4938	498	12500	FtPinG0008935500.01.T01,FtPinG0000841000.01.T01,FtPinG0005728400.01.T01,FtPinG0003531300.01.T01,FtPinG0009108000.01.T01,FtPinG0000345500.01.T01,FtPinG0004264900.01.T01,FtPinG0008141700.01.T01,FtPinG0001544800.01.T01,FtPinG0004064400.01.T01,FtPinG0009633900.01.T01,FtPinG0009322000.01.T01,FtPinG0001311200.01.T01,FtPinG0007193700.01.T01,FtPinG0003092800.01.T01,FtPinG0004377600.01.T01,FtPinG000957290…
Cellular component	extracellular region	GO:0005576	3	0.0273897	1.45582	29	500	498	12500	FtPinG0005613800.01.T01,FtPinG0004106700.01.T01,FtPinG0004064400.01.T01,FtPinG0003141500.01.T01,FtPinG0003635300.01.T01,FtPinG0002245700.01.T01,FtPinG0003197500.01.T01,FtPinG0005796700.01.T01,FtPinG0000127800.01.T01,FtPinG0006547600.01.T01,FtPinG0002253700.01.T01,FtPinG0004502300.01.T01,FtPinG0005357600.01.T01,FtPinG0005725200.01.T01,FtPinG0008665900.01.T01,FtPinG0001411800.01.T01,FtPinG000909330…
Cellular component	integral component of membrane	GO:0016021	4	0.0372197	1.3472	38	708	498	12500	FtPinG0000345500.01.T01,FtPinG0004377600.01.T01,FtPinG0009572900.01.T01,FtPinG0007884200.01.T01,FtPinG0005717800.01.T01,FtPinG0006978500.01.T01,FtPinG0001940300.01.T01,FtPinG0000974900.01.T01,FtPinG0000374400.01.T01,FtPinG0001693600.01.T01,FtPinG0006867700.01.T01,FtPinG0004464600.01.T01,FtPinG0001624100.01.T01,FtPinG0008231400.01.T01,FtPinG0001923900.01.T01,FtPinG0002696700.01.T01,FtPinG000835340…
Cellular component	apoplast	GO:0048046	4	0.0397432	1.56878	18	288	498	12500	FtPinG0004106700.01.T01,FtPinG0004064400.01.T01,FtPinG0002245700.01.T01,FtPinG0003197500.01.T01,FtPinG0005796700.01.T01,FtPinG0005357600.01.T01,FtPinG0005725200.01.T01,FtPinG0008665900.01.T01,FtPinG0001411800.01.T01,FtPinG0009093300.01.T01,FtPinG0004216200.01.T01,FtPinG0004098000.01.T01,FtPinG0001476300.01.T01,FtPinG0000615900.01.T01,FtPinG0002721300.01.T01,FtPinG0003403400.01.T01,FtPinG000715310…
Cellular component	intrinsic component of organelle membrane	GO:0031300	4	0.0422241	1.8046	11	153	498	12500	FtPinG0000345500.01.T01,FtPinG0009572900.01.T01,FtPinG0000974900.01.T01,FtPinG0000374400.01.T01,FtPinG0006867700.01.T01,FtPinG0007768700.01.T01,FtPinG0002262100.01.T01,FtPinG0001100200.01.T01,FtPinG0009084100.01.T01,FtPinG0009342600.01.T01,FtPinG0007162600.01.T01,
Biological process	response to alcohol	GO:0097305	5	6.78346e-14	2.5344	74	724	500	12398	FtPinG0007888700.01.T01,FtPinG0002272200.01.T01,FtPinG0004870600.01.T01,FtPinG0008534800.01.T01,FtPinG0006100300.01.T01,FtPinG0002265300.01.T01,FtPinG0003197500.01.T01,FtPinG0006978500.01.T01,FtPinG0005207900.01.T01,FtPinG0007802700.01.T01,FtPinG0005752600.01.T01,FtPinG0001405800.01.T01,FtPinG0001408600.01.T01,FtPinG0001209500.01.T01,FtPinG0005996500.01.T01,FtPinG0000470400.01.T01,FtPinG000895840…
Biological process	response to abscisic acid	GO:0009737	6	2.76112e-13	2.52585	71	697	500	12398	FtPinG0007888700.01.T01,FtPinG0002272200.01.T01,FtPinG0004870600.01.T01,FtPinG0008534800.01.T01,FtPinG0006100300.01.T01,FtPinG0002265300.01.T01,FtPinG0003197500.01.T01,FtPinG0006978500.01.T01,FtPinG0005207900.01.T01,FtPinG0007802700.01.T01,FtPinG0005752600.01.T01,FtPinG0001405800.01.T01,FtPinG0001408600.01.T01,FtPinG0001209500.01.T01,FtPinG0005996500.01.T01,FtPinG0000470400.01.T01,FtPinG000895840…
Biological process	response to oxygen-containing compound	GO:1901700	4	3.62932e-13	1.80859	138	1892	500	12398	FtPinG0007888700.01.T01,FtPinG0001212400.01.T01,FtPinG0008935500.01.T01,FtPinG0005728400.01.T01,FtPinG0002272200.01.T01,FtPinG0007990400.01.T01,FtPinG0008141700.01.T01,FtPinG0009633900.01.T01,FtPinG0009572900.01.T01,FtPinG0004870600.01.T01,FtPinG0008534800.01.T01,FtPinG0006100300.01.T01,FtPinG0002265300.01.T01,FtPinG0002245700.01.T01,FtPinG0006092000.01.T01,FtPinG0006575700.01.T01,FtPinG000594610…
Biological process	response to inorganic substance	GO:0010035	4	2.46003e-12	2.0983	93	1099	500	12398	FtPinG0001212400.01.T01,FtPinG0008935500.01.T01,FtPinG0005728400.01.T01,FtPinG0003531300.01.T01,FtPinG0003223000.01.T01,FtPinG0008141700.01.T01,FtPinG0004106700.01.T01,FtPinG0007193700.01.T01,FtPinG0004870600.01.T01,FtPinG0006575700.01.T01,FtPinG0007754400.01.T01,FtPinG0000580500.01.T01,FtPinG0000246400.01.T01,FtPinG0003050700.01.T01,FtPinG0004548300.01.T01,FtPinG0000986400.01.T01,FtPinG000140580…
Biological process	response to acid chemical	GO:0001101	4	1.15781e-11	1.94961	103	1310	500	12398	FtPinG0007888700.01.T01,FtPinG0001212400.01.T01,FtPinG0008935500.01.T01,FtPinG0005728400.01.T01,FtPinG0002272200.01.T01,FtPinG0007990400.01.T01,FtPinG0004870600.01.T01,FtPinG0008534800.01.T01,FtPinG0002265300.01.T01,FtPinG0006092000.01.T01,FtPinG0006575700.01.T01,FtPinG0005946100.01.T01,FtPinG0007754400.01.T01,FtPinG0000580500.01.T01,FtPinG0003197500.01.T01,FtPinG0000246400.01.T01,FtPinG000305070…
Biological process	response to chemical	GO:0042221	3	8.84608e-11	1.45335	212	3617	500	12398	FtPinG0007888700.01.T01,FtPinG0001212400.01.T01,FtPinG0008935500.01.T01,FtPinG0005728400.01.T01,FtPinG0003531300.01.T01,FtPinG0002272200.01.T01,FtPinG0007990400.01.T01,FtPinG0003223000.01.T01,FtPinG0005108300.01.T01,FtPinG0008141700.01.T01,FtPinG0004106700.01.T01,FtPinG0009633900.01.T01,FtPinG0007193700.01.T01,FtPinG0003092800.01.T01,FtPinG0009572900.01.T01,FtPinG0004870600.01.T01,FtPinG000853480…
Biological process	response to abiotic stimulus	GO:0009628	3	1.11452e-10	1.62973	149	2267	500	12398	FtPinG0007888700.01.T01,FtPinG0008935500.01.T01,FtPinG0002272200.01.T01,FtPinG0008141700.01.T01,FtPinG0004106700.01.T01,FtPinG0009424400.01.T01,FtPinG0007039000.01.T01,FtPinG0004870600.01.T01,FtPinG0004666000.01.T01,FtPinG0001223800.01.T01,FtPinG0002245700.01.T01,FtPinG0006575700.01.T01,FtPinG0007946400.01.T01,FtPinG0006338600.01.T01,FtPinG0007754400.01.T01,FtPinG0004635500.01.T01,FtPinG000866270…
Biological process	response to lipid	GO:0033993	5	6.50047e-10	1.9505	87	1106	500	12398	FtPinG0007888700.01.T01,FtPinG0002272200.01.T01,FtPinG0007990400.01.T01,FtPinG0009633900.01.T01,FtPinG0004870600.01.T01,FtPinG0008534800.01.T01,FtPinG0006100300.01.T01,FtPinG0002265300.01.T01,FtPinG0006092000.01.T01,FtPinG0007680200.01.T01,FtPinG0003197500.01.T01,FtPinG0003050700.01.T01,FtPinG0006978500.01.T01,FtPinG0005207900.01.T01,FtPinG0007802700.01.T01,FtPinG0006602200.01.T01,FtPinG000575260…
Biological process	response to water deprivation	GO:0009414	6	1.58305e-09	2.66943	45	418	500	12398	FtPinG0008935500.01.T01,FtPinG0004870600.01.T01,FtPinG0006575700.01.T01,FtPinG0007754400.01.T01,FtPinG0000580500.01.T01,FtPinG0000246400.01.T01,FtPinG0001405800.01.T01,FtPinG0002173200.01.T01,FtPinG0008958400.01.T01,FtPinG0008416400.01.T01,FtPinG0004425400.01.T01,FtPinG0000907700.01.T01,FtPinG0000345400.01.T01,FtPinG0007473900.01.T01,FtPinG0008844900.01.T01,FtPinG0002143600.01.T01,FtPinG000438860…
Biological process	response to water	GO:0009415	5	1.84297e-09	2.65671	45	420	500	12398	FtPinG0008935500.01.T01,FtPinG0004870600.01.T01,FtPinG0006575700.01.T01,FtPinG0007754400.01.T01,FtPinG0000580500.01.T01,FtPinG0000246400.01.T01,FtPinG0001405800.01.T01,FtPinG0002173200.01.T01,FtPinG0008958400.01.T01,FtPinG0008416400.01.T01,FtPinG0004425400.01.T01,FtPinG0000907700.01.T01,FtPinG0000345400.01.T01,FtPinG0007473900.01.T01,FtPinG0008844900.01.T01,FtPinG0002143600.01.T01,FtPinG000438860…
Biological process	response to stress	GO:0006950	3	2.05512e-09	1.45274	190	3243	500	12398	FtPinG0007888700.01.T01,FtPinG0001212400.01.T01,FtPinG0008935500.01.T01,FtPinG0005728400.01.T01,FtPinG0002272200.01.T01,FtPinG0001704600.01.T01,FtPinG0008141700.01.T01,FtPinG0004106700.01.T01,FtPinG0009424400.01.T01,FtPinG0007193700.01.T01,FtPinG0003141500.01.T01,FtPinG0007039000.01.T01,FtPinG0004870600.01.T01,FtPinG0009025300.01.T01,FtPinG0000129600.01.T01,FtPinG0008534800.01.T01,FtPinG000466600…
Biological process	cellular response to abscisic acid stimulus	GO:0071215	7	1.34117e-08	2.90254	35	299	500	12398	FtPinG0004870600.01.T01,FtPinG0006100300.01.T01,FtPinG0005207900.01.T01,FtPinG0007802700.01.T01,FtPinG0005752600.01.T01,FtPinG0001408600.01.T01,FtPinG0005996500.01.T01,FtPinG0000470400.01.T01,FtPinG0003996100.01.T01,FtPinG0009384500.01.T01,FtPinG0005433500.01.T01,FtPinG0002143600.01.T01,FtPinG0000202400.01.T01,FtPinG0001114500.01.T01,FtPinG0006421500.01.T01,FtPinG0008870900.01.T01,FtPinG000123520…
Biological process	cellular response to alcohol	GO:0097306	6	1.34117e-08	2.90254	35	299	500	12398	FtPinG0004870600.01.T01,FtPinG0006100300.01.T01,FtPinG0005207900.01.T01,FtPinG0007802700.01.T01,FtPinG0005752600.01.T01,FtPinG0001408600.01.T01,FtPinG0005996500.01.T01,FtPinG0000470400.01.T01,FtPinG0003996100.01.T01,FtPinG0009384500.01.T01,FtPinG0005433500.01.T01,FtPinG0002143600.01.T01,FtPinG0000202400.01.T01,FtPinG0001114500.01.T01,FtPinG0006421500.01.T01,FtPinG0008870900.01.T01,FtPinG000123520…
Biological process	response to organic substance	GO:0010033	4	1.92419e-08	1.52932	145	2351	500	12398	FtPinG0007888700.01.T01,FtPinG0001212400.01.T01,FtPinG0002272200.01.T01,FtPinG0007990400.01.T01,FtPinG0003223000.01.T01,FtPinG0005108300.01.T01,FtPinG0008141700.01.T01,FtPinG0009633900.01.T01,FtPinG0009572900.01.T01,FtPinG0004870600.01.T01,FtPinG0008534800.01.T01,FtPinG0006100300.01.T01,FtPinG0002265300.01.T01,FtPinG0001223800.01.T01,FtPinG0002245700.01.T01,FtPinG0006092000.01.T01,FtPinG000824540…
Biological process	abscisic acid-activated signaling pathway	GO:0009738	7	2.2894e-08	2.95404	33	277	500	12398	FtPinG0004870600.01.T01,FtPinG0006100300.01.T01,FtPinG0005207900.01.T01,FtPinG0007802700.01.T01,FtPinG0005752600.01.T01,FtPinG0001408600.01.T01,FtPinG0005996500.01.T01,FtPinG0000470400.01.T01,FtPinG0003996100.01.T01,FtPinG0009384500.01.T01,FtPinG0005433500.01.T01,FtPinG0002143600.01.T01,FtPinG0000202400.01.T01,FtPinG0001114500.01.T01,FtPinG0006421500.01.T01,FtPinG0008870900.01.T01,FtPinG000123520…
Biological process	response to heat	GO:0009408	5	4.10857e-08	3.07388	30	242	500	12398	FtPinG0004106700.01.T01,FtPinG0002245700.01.T01,FtPinG0006338600.01.T01,FtPinG0007754400.01.T01,FtPinG0009211600.01.T01,FtPinG0007575400.01.T01,FtPinG0000533900.01.T01,FtPinG0003983600.01.T01,FtPinG0001727900.01.T01,FtPinG0005725200.01.T01,FtPinG0000202400.01.T01,FtPinG0001254100.01.T01,FtPinG0005793100.01.T01,FtPinG0001478700.01.T01,FtPinG0007501100.01.T01,FtPinG0007461700.01.T01,FtPinG000181890…
Biological process	response to temperature stimulus	GO:0009266	4	4.75598e-08	2.1613	55	631	500	12398	FtPinG0004106700.01.T01,FtPinG0004870600.01.T01,FtPinG0002245700.01.T01,FtPinG0006338600.01.T01,FtPinG0007754400.01.T01,FtPinG0000580500.01.T01,FtPinG0001405800.01.T01,FtPinG0009211600.01.T01,FtPinG0004558000.01.T01,FtPinG0007575400.01.T01,FtPinG0000533900.01.T01,FtPinG0000345400.01.T01,FtPinG0006867700.01.T01,FtPinG0003983600.01.T01,FtPinG0001727900.01.T01,FtPinG0005725200.01.T01,FtPinG000020240…
Biological process	response to osmotic stress	GO:0006970	4	7.39363e-08	2.03574	61	743	500	12398	FtPinG0007888700.01.T01,FtPinG0008935500.01.T01,FtPinG0002272200.01.T01,FtPinG0009424400.01.T01,FtPinG0007039000.01.T01,FtPinG0004870600.01.T01,FtPinG0004666000.01.T01,FtPinG0001223800.01.T01,FtPinG0000580500.01.T01,FtPinG0000246400.01.T01,FtPinG0005207900.01.T01,FtPinG0005008500.01.T01,FtPinG0000470400.01.T01,FtPinG0003996100.01.T01,FtPinG0001847800.01.T01,FtPinG0000294900.01.T01,FtPinG000442540…
Biological process	response to hormone	GO:0009725	5	1.35585e-07	1.56854	120	1897	500	12398	FtPinG0007888700.01.T01,FtPinG0001212400.01.T01,FtPinG0002272200.01.T01,FtPinG0007990400.01.T01,FtPinG0003223000.01.T01,FtPinG0005108300.01.T01,FtPinG0008141700.01.T01,FtPinG0009633900.01.T01,FtPinG0004870600.01.T01,FtPinG0008534800.01.T01,FtPinG0006100300.01.T01,FtPinG0002265300.01.T01,FtPinG0001223800.01.T01,FtPinG0006092000.01.T01,FtPinG0008245400.01.T01,FtPinG0005946100.01.T01,FtPinG000768020…
Biological process	response to endogenous stimulus	GO:0009719	3	2.88157e-07	1.54337	121	1944	500	12398	FtPinG0007888700.01.T01,FtPinG0001212400.01.T01,FtPinG0002272200.01.T01,FtPinG0007990400.01.T01,FtPinG0003223000.01.T01,FtPinG0005108300.01.T01,FtPinG0008141700.01.T01,FtPinG0009633900.01.T01,FtPinG0004870600.01.T01,FtPinG0008534800.01.T01,FtPinG0006100300.01.T01,FtPinG0002265300.01.T01,FtPinG0001223800.01.T01,FtPinG0006092000.01.T01,FtPinG0008245400.01.T01,FtPinG0005946100.01.T01,FtPinG000768020…
Biological process	response to stimulus	GO:0050896	2	3.0995e-07	1.22818	296	5976	500	12398	FtPinG0007888700.01.T01,FtPinG0001212400.01.T01,FtPinG0008435500.01.T01,FtPinG0008935500.01.T01,FtPinG0005728400.01.T01,FtPinG0003531300.01.T01,FtPinG0002272200.01.T01,FtPinG0007990400.01.T01,FtPinG0001704600.01.T01,FtPinG0003223000.01.T01,FtPinG0005108300.01.T01,FtPinG0008141700.01.T01,FtPinG0004106700.01.T01,FtPinG0009633900.01.T01,FtPinG0009424400.01.T01,FtPinG0007193700.01.T01,FtPinG000309280…
Biological process	regulation of response to alcohol	GO:1901419	5	1.61463e-06	3.27494	21	159	500	12398	FtPinG0006100300.01.T01,FtPinG0005752600.01.T01,FtPinG0005996500.01.T01,FtPinG0000470400.01.T01,FtPinG0003996100.01.T01,FtPinG0005433500.01.T01,FtPinG0002143600.01.T01,FtPinG0001114500.01.T01,FtPinG0006421500.01.T01,FtPinG0008870900.01.T01,FtPinG0003196200.01.T01,FtPinG0003261200.01.T01,FtPinG0005167000.01.T01,FtPinG0005918800.01.T01,FtPinG0004759200.01.T01,FtPinG0007401700.01.T01,FtPinG000634610…
Biological process	regulation of cellular response to alcohol	GO:1905957	6	1.61463e-06	3.27494	21	159	500	12398	FtPinG0006100300.01.T01,FtPinG0005752600.01.T01,FtPinG0005996500.01.T01,FtPinG0000470400.01.T01,FtPinG0003996100.01.T01,FtPinG0005433500.01.T01,FtPinG0002143600.01.T01,FtPinG0001114500.01.T01,FtPinG0006421500.01.T01,FtPinG0008870900.01.T01,FtPinG0003196200.01.T01,FtPinG0003261200.01.T01,FtPinG0005167000.01.T01,FtPinG0005918800.01.T01,FtPinG0004759200.01.T01,FtPinG0007401700.01.T01,FtPinG000634610…
Biological process	regulation of abscisic acid-activated signaling pathway	GO:0009787	7	1.61463e-06	3.27494	21	159	500	12398	FtPinG0006100300.01.T01,FtPinG0005752600.01.T01,FtPinG0005996500.01.T01,FtPinG0000470400.01.T01,FtPinG0003996100.01.T01,FtPinG0005433500.01.T01,FtPinG0002143600.01.T01,FtPinG0001114500.01.T01,FtPinG0006421500.01.T01,FtPinG0008870900.01.T01,FtPinG0003196200.01.T01,FtPinG0003261200.01.T01,FtPinG0005167000.01.T01,FtPinG0005918800.01.T01,FtPinG0004759200.01.T01,FtPinG0007401700.01.T01,FtPinG000634610…
Biological process	response to light intensity	GO:0009642	6	2.56706e-06	3.08199	22	177	500	12398	FtPinG0004635500.01.T01,FtPinG0002747100.01.T01,FtPinG0002714200.01.T01,FtPinG0007575400.01.T01,FtPinG0000127800.01.T01,FtPinG0007705700.01.T01,FtPinG0000345400.01.T01,FtPinG0003257800.01.T01,FtPinG0001727900.01.T01,FtPinG0005725200.01.T01,FtPinG0001254100.01.T01,FtPinG0001478700.01.T01,FtPinG0007501100.01.T01,FtPinG0007461700.01.T01,FtPinG0001818900.01.T01,FtPinG0007044900.01.T01,FtPinG000237000…
Biological process	response to high light intensity	GO:0009644	7	5.54386e-06	3.91516	15	95	500	12398	FtPinG0004635500.01.T01,FtPinG0007575400.01.T01,FtPinG0000345400.01.T01,FtPinG0003257800.01.T01,FtPinG0001727900.01.T01,FtPinG0005725200.01.T01,FtPinG0001254100.01.T01,FtPinG0001478700.01.T01,FtPinG0007501100.01.T01,FtPinG0007461700.01.T01,FtPinG0001818900.01.T01,FtPinG0002370000.01.T01,FtPinG0006431700.01.T01,FtPinG0004098000.01.T01,FtPinG0008693100.01.T01,
Biological process	response to salt stress	GO:0009651	5	5.77946e-06	1.92815	50	643	500	12398	FtPinG0008935500.01.T01,FtPinG0002272200.01.T01,FtPinG0009424400.01.T01,FtPinG0007039000.01.T01,FtPinG0004870600.01.T01,FtPinG0004666000.01.T01,FtPinG0001223800.01.T01,FtPinG0000246400.01.T01,FtPinG0005207900.01.T01,FtPinG0005008500.01.T01,FtPinG0000470400.01.T01,FtPinG0003996100.01.T01,FtPinG0001847800.01.T01,FtPinG0000294900.01.T01,FtPinG0000907700.01.T01,FtPinG0006680200.01.T01,FtPinG000108380…
Biological process	cellular response to oxygen-containing compound	GO:1901701	5	6.11168e-06	1.79681	60	828	500	12398	FtPinG0007990400.01.T01,FtPinG0008141700.01.T01,FtPinG0009633900.01.T01,FtPinG0009572900.01.T01,FtPinG0004870600.01.T01,FtPinG0006100300.01.T01,FtPinG0006092000.01.T01,FtPinG0005946100.01.T01,FtPinG0007754400.01.T01,FtPinG0003050700.01.T01,FtPinG0006978500.01.T01,FtPinG0005207900.01.T01,FtPinG0007802700.01.T01,FtPinG0006602200.01.T01,FtPinG0005752600.01.T01,FtPinG0001408600.01.T01,FtPinG000120950…
Biological process	plant organ senescence	GO:0090693	4	6.70417e-06	3.0995	20	160	500	12398	FtPinG0001212400.01.T01,FtPinG0000271800.01.T01,FtPinG0004264900.01.T01,FtPinG0004797700.01.T01,FtPinG0004870600.01.T01,FtPinG0006087500.01.T01,FtPinG0006603600.01.T01,FtPinG0003050700.01.T01,FtPinG0000176500.01.T01,FtPinG0004997500.01.T01,FtPinG0008161600.01.T01,FtPinG0007231700.01.T01,FtPinG0007325700.01.T01,FtPinG0001650100.01.T01,FtPinG0006640900.01.T01,FtPinG0000493900.01.T01,FtPinG000516700…
Biological process	seed maturation	GO:0010431	5	1.67623e-05	4.70269	11	58	500	12398	FtPinG0000246400.01.T01,FtPinG0006680200.01.T01,FtPinG0008844900.01.T01,FtPinG0000050100.01.T01,FtPinG0008505600.01.T01,FtPinG0007501100.01.T01,FtPinG0003175900.01.T01,FtPinG0003149600.01.T01,FtPinG0002461800.01.T01,FtPinG0006346100.01.T01,FtPinG0008230700.01.T01,
Biological process	cellular response to lipid	GO:0071396	6	2.6919e-05	1.91073	44	571	500	12398	FtPinG0007990400.01.T01,FtPinG0009633900.01.T01,FtPinG0004870600.01.T01,FtPinG0006100300.01.T01,FtPinG0006092000.01.T01,FtPinG0003050700.01.T01,FtPinG0005207900.01.T01,FtPinG0007802700.01.T01,FtPinG0006602200.01.T01,FtPinG0005752600.01.T01,FtPinG0001408600.01.T01,FtPinG0005996500.01.T01,FtPinG0002173200.01.T01,FtPinG0000470400.01.T01,FtPinG0003996100.01.T01,FtPinG0009384500.01.T01,FtPinG000543350…
Biological process	aging	GO:0007568	3	4.52433e-05	2.72484	20	182	500	12398	FtPinG0001212400.01.T01,FtPinG0000271800.01.T01,FtPinG0004264900.01.T01,FtPinG0004797700.01.T01,FtPinG0004870600.01.T01,FtPinG0006087500.01.T01,FtPinG0006603600.01.T01,FtPinG0003050700.01.T01,FtPinG0000176500.01.T01,FtPinG0004997500.01.T01,FtPinG0008161600.01.T01,FtPinG0007231700.01.T01,FtPinG0007325700.01.T01,FtPinG0001650100.01.T01,FtPinG0006640900.01.T01,FtPinG0000493900.01.T01,FtPinG000516700…
Biological process	leaf senescence	GO:0010150	5	4.78973e-05	2.89823	18	154	500	12398	FtPinG0001212400.01.T01,FtPinG0000271800.01.T01,FtPinG0004264900.01.T01,FtPinG0004797700.01.T01,FtPinG0004870600.01.T01,FtPinG0006087500.01.T01,FtPinG0006603600.01.T01,FtPinG0000176500.01.T01,FtPinG0004997500.01.T01,FtPinG0008161600.01.T01,FtPinG0007325700.01.T01,FtPinG0001650100.01.T01,FtPinG0006640900.01.T01,FtPinG0000493900.01.T01,FtPinG0005167000.01.T01,FtPinG0006346100.01.T01,FtPinG000656360…
Biological process	negative regulation of response to alcohol	GO:1901420	6	7.07536e-05	3.76648	12	79	500	12398	FtPinG0005752600.01.T01,FtPinG0001114500.01.T01,FtPinG0006421500.01.T01,FtPinG0003261200.01.T01,FtPinG0005167000.01.T01,FtPinG0005918800.01.T01,FtPinG0007401700.01.T01,FtPinG0006346100.01.T01,FtPinG0006563600.01.T01,FtPinG0004827100.01.T01,FtPinG0007007100.01.T01,FtPinG0009617800.01.T01,
Biological process	negative regulation of cellular response to alcohol	GO:1905958	7	7.07536e-05	3.76648	12	79	500	12398	FtPinG0005752600.01.T01,FtPinG0001114500.01.T01,FtPinG0006421500.01.T01,FtPinG0003261200.01.T01,FtPinG0005167000.01.T01,FtPinG0005918800.01.T01,FtPinG0007401700.01.T01,FtPinG0006346100.01.T01,FtPinG0006563600.01.T01,FtPinG0004827100.01.T01,FtPinG0007007100.01.T01,FtPinG0009617800.01.T01,
Biological process	negative regulation of abscisic acid-activated signaling pathway	GO:0009788	8	7.07536e-05	3.76648	12	79	500	12398	FtPinG0005752600.01.T01,FtPinG0001114500.01.T01,FtPinG0006421500.01.T01,FtPinG0003261200.01.T01,FtPinG0005167000.01.T01,FtPinG0005918800.01.T01,FtPinG0007401700.01.T01,FtPinG0006346100.01.T01,FtPinG0006563600.01.T01,FtPinG0004827100.01.T01,FtPinG0007007100.01.T01,FtPinG0009617800.01.T01,
Biological process	regulation of seedling development	GO:1900140	7	0.000124917	3.0239	15	123	500	12398	FtPinG0000271800.01.T01,FtPinG0009633900.01.T01,FtPinG0004797700.01.T01,FtPinG0003050700.01.T01,FtPinG0001405800.01.T01,FtPinG0007575400.01.T01,FtPinG0002363800.01.T01,FtPinG0005357600.01.T01,FtPinG0006640900.01.T01,FtPinG0003310400.01.T01,FtPinG0002318100.01.T01,FtPinG0002208200.01.T01,FtPinG0000493900.01.T01,FtPinG0006346100.01.T01,FtPinG0009743100.01.T01,
Biological process	response to cadmium ion	GO:0046686	6	0.00013834	2.00879	32	395	500	12398	FtPinG0003531300.01.T01,FtPinG0003223000.01.T01,FtPinG0004106700.01.T01,FtPinG0007297000.01.T01,FtPinG0009211600.01.T01,FtPinG0007978200.01.T01,FtPinG0000533900.01.T01,FtPinG0008690600.01.T01,FtPinG0001083800.01.T01,FtPinG0003983600.01.T01,FtPinG0005357600.01.T01,FtPinG0005725200.01.T01,FtPinG0008957600.01.T01,FtPinG0003294300.01.T01,FtPinG0005485800.01.T01,FtPinG0007044900.01.T01,FtPinG000909330…
Biological process	organonitrogen compound catabolic process	GO:1901565	5	0.000186278	1.6868	50	735	500	12398	FtPinG0004269300.01.T01,FtPinG0001380800.01.T01,FtPinG0008534800.01.T01,FtPinG0009107300.01.T01,FtPinG0004668900.01.T01,FtPinG0004635500.01.T01,FtPinG0004701300.01.T01,FtPinG0000580500.01.T01,FtPinG0008578300.01.T01,FtPinG0006978500.01.T01,FtPinG0005008500.01.T01,FtPinG0002747100.01.T01,FtPinG0000470400.01.T01,FtPinG0001088000.01.T01,FtPinG0000967400.01.T01,FtPinG0007297000.01.T01,FtPinG000049370…
Biological process	seedling development	GO:0090351	4	0.000186753	2.34125	22	233	500	12398	FtPinG0000271800.01.T01,FtPinG0009633900.01.T01,FtPinG0004797700.01.T01,FtPinG0002105000.01.T01,FtPinG0003050700.01.T01,FtPinG0001405800.01.T01,FtPinG0001847800.01.T01,FtPinG0007575400.01.T01,FtPinG0002363800.01.T01,FtPinG0006680200.01.T01,FtPinG0005357600.01.T01,FtPinG0006640900.01.T01,FtPinG0002619800.01.T01,FtPinG0003310400.01.T01,FtPinG0002318100.01.T01,FtPinG0002208200.01.T01,FtPinG000942360…
Biological process	response to carbohydrate	GO:0009743	5	0.000284913	2.38423	20	208	500	12398	FtPinG0008141700.01.T01,FtPinG0009572900.01.T01,FtPinG0004870600.01.T01,FtPinG0002245700.01.T01,FtPinG0007754400.01.T01,FtPinG0003050700.01.T01,FtPinG0001209500.01.T01,FtPinG0002747100.01.T01,FtPinG0008014900.01.T01,FtPinG0008844900.01.T01,FtPinG0001114500.01.T01,FtPinG0006640900.01.T01,FtPinG0008278400.01.T01,FtPinG0001235200.01.T01,FtPinG0000493900.01.T01,FtPinG0001053400.01.T01,FtPinG000971110…
Biological process	response to hydrogen peroxide	GO:0042542	6	0.000329247	3.04102	13	106	500	12398	FtPinG0001212400.01.T01,FtPinG0009211600.01.T01,FtPinG0005725200.01.T01,FtPinG0001869900.01.T01,FtPinG0001254100.01.T01,FtPinG0001478700.01.T01,FtPinG0007461700.01.T01,FtPinG0001818900.01.T01,FtPinG0008433800.01.T01,FtPinG0002370000.01.T01,FtPinG0001235200.01.T01,FtPinG0001770900.01.T01,FtPinG0007629700.01.T01,
Biological process	small molecule catabolic process	GO:0044282	4	0.000362323	2.40369	19	196	500	12398	FtPinG0009572900.01.T01,FtPinG0006100300.01.T01,FtPinG0001209500.01.T01,FtPinG0005996500.01.T01,FtPinG0002747100.01.T01,FtPinG0001088000.01.T01,FtPinG0004264800.01.T01,FtPinG0001083800.01.T01,FtPinG0007311200.01.T01,FtPinG0005357600.01.T01,FtPinG0009549300.01.T01,FtPinG0007768700.01.T01,FtPinG0009711100.01.T01,FtPinG0001479200.01.T01,FtPinG0002461800.01.T01,FtPinG0007406000.01.T01,FtPinG000305100…
Biological process	response to oxidative stress	GO:0006979	4	0.000382873	1.89826	32	418	500	12398	FtPinG0001212400.01.T01,FtPinG0008935500.01.T01,FtPinG0005728400.01.T01,FtPinG0004870600.01.T01,FtPinG0009107800.01.T01,FtPinG0006247600.01.T01,FtPinG0009211600.01.T01,FtPinG0002130200.01.T01,FtPinG0008416400.01.T01,FtPinG0002482700.01.T01,FtPinG0001083800.01.T01,FtPinG0009530300.01.T01,FtPinG0005725200.01.T01,FtPinG0002954800.01.T01,FtPinG0001869900.01.T01,FtPinG0001254100.01.T01,FtPinG000147870…
Biological process	regulation of response to osmotic stress	GO:0047484	6	0.000420154	3.91516	9	57	500	12398	FtPinG0009424400.01.T01,FtPinG0005207900.01.T01,FtPinG0000470400.01.T01,FtPinG0003996100.01.T01,FtPinG0005433500.01.T01,FtPinG0007501100.01.T01,FtPinG0005167000.01.T01,FtPinG0006563600.01.T01,FtPinG0001770900.01.T01,
Biological process	regulation of seed germination	GO:0010029	8	0.000433475	2.95732	13	109	500	12398	FtPinG0000271800.01.T01,FtPinG0004797700.01.T01,FtPinG0003050700.01.T01,FtPinG0001405800.01.T01,FtPinG0007575400.01.T01,FtPinG0005357600.01.T01,FtPinG0006640900.01.T01,FtPinG0003310400.01.T01,FtPinG0002318100.01.T01,FtPinG0002208200.01.T01,FtPinG0000493900.01.T01,FtPinG0006346100.01.T01,FtPinG0009743100.01.T01,
Biological process	response to reactive oxygen species	GO:0000302	5	0.00049493	2.28535	20	217	500	12398	FtPinG0001212400.01.T01,FtPinG0005728400.01.T01,FtPinG0004870600.01.T01,FtPinG0009107800.01.T01,FtPinG0009211600.01.T01,FtPinG0002482700.01.T01,FtPinG0005725200.01.T01,FtPinG0001869900.01.T01,FtPinG0001254100.01.T01,FtPinG0001478700.01.T01,FtPinG0002463600.01.T01,FtPinG0007461700.01.T01,FtPinG0001818900.01.T01,FtPinG0007044900.01.T01,FtPinG0008433800.01.T01,FtPinG0002370000.01.T01,FtPinG000123520…
Biological process	response to cold	GO:0009409	5	0.000739537	1.84778	31	416	500	12398	FtPinG0004870600.01.T01,FtPinG0000580500.01.T01,FtPinG0001405800.01.T01,FtPinG0007575400.01.T01,FtPinG0000345400.01.T01,FtPinG0006867700.01.T01,FtPinG0000202400.01.T01,FtPinG0004388600.01.T01,FtPinG0003316500.01.T01,FtPinG0006484100.01.T01,FtPinG0007501100.01.T01,FtPinG0007461700.01.T01,FtPinG0006839100.01.T01,FtPinG0009093300.01.T01,FtPinG0002370000.01.T01,FtPinG0001235200.01.T01,FtPinG000502010…
Biological process	cellular response to organic substance	GO:0071310	5	0.000795455	1.44677	72	1234	500	12398	FtPinG0007990400.01.T01,FtPinG0008141700.01.T01,FtPinG0009633900.01.T01,FtPinG0009572900.01.T01,FtPinG0004870600.01.T01,FtPinG0006100300.01.T01,FtPinG0006092000.01.T01,FtPinG0008245400.01.T01,FtPinG0005946100.01.T01,FtPinG0007754400.01.T01,FtPinG0000580500.01.T01,FtPinG0003050700.01.T01,FtPinG0006978500.01.T01,FtPinG0005207900.01.T01,FtPinG0007802700.01.T01,FtPinG0006602200.01.T01,FtPinG000575260…
Biological process	negative regulation of signal transduction	GO:0009968	7	0.000899877	2.23282	19	211	500	12398	FtPinG0008141700.01.T01,FtPinG0007946400.01.T01,FtPinG0001302000.01.T01,FtPinG0003050700.01.T01,FtPinG0001519200.01.T01,FtPinG0005752600.01.T01,FtPinG0009384500.01.T01,FtPinG0001114500.01.T01,FtPinG0006421500.01.T01,FtPinG0003261200.01.T01,FtPinG0007173800.01.T01,FtPinG0005167000.01.T01,FtPinG0005918800.01.T01,FtPinG0007401700.01.T01,FtPinG0006346100.01.T01,FtPinG0006563600.01.T01,FtPinG000482710…
Biological process	cellular response to hormone stimulus	GO:0032870	6	0.000903309	1.50279	60	990	500	12398	FtPinG0007990400.01.T01,FtPinG0008141700.01.T01,FtPinG0009633900.01.T01,FtPinG0004870600.01.T01,FtPinG0006100300.01.T01,FtPinG0006092000.01.T01,FtPinG0008245400.01.T01,FtPinG0003050700.01.T01,FtPinG0006978500.01.T01,FtPinG0005207900.01.T01,FtPinG0007802700.01.T01,FtPinG0006602200.01.T01,FtPinG0005752600.01.T01,FtPinG0001940300.01.T01,FtPinG0001408600.01.T01,FtPinG0005996500.01.T01,FtPinG000217320…
Biological process	cellular response to endogenous stimulus	GO:0071495	4	0.000907041	1.48493	63	1052	500	12398	FtPinG0007990400.01.T01,FtPinG0008141700.01.T01,FtPinG0009633900.01.T01,FtPinG0004870600.01.T01,FtPinG0006100300.01.T01,FtPinG0006092000.01.T01,FtPinG0008245400.01.T01,FtPinG0005946100.01.T01,FtPinG0003050700.01.T01,FtPinG0006978500.01.T01,FtPinG0005207900.01.T01,FtPinG0007802700.01.T01,FtPinG0006602200.01.T01,FtPinG0005752600.01.T01,FtPinG0001940300.01.T01,FtPinG0001408600.01.T01,FtPinG000599650…
Biological process	seed germination	GO:0009845	3	0.000952441	2.22228	19	212	500	12398	FtPinG0000271800.01.T01,FtPinG0004797700.01.T01,FtPinG0003050700.01.T01,FtPinG0001405800.01.T01,FtPinG0001847800.01.T01,FtPinG0007575400.01.T01,FtPinG0006680200.01.T01,FtPinG0005357600.01.T01,FtPinG0006640900.01.T01,FtPinG0002619800.01.T01,FtPinG0003310400.01.T01,FtPinG0002318100.01.T01,FtPinG0002208200.01.T01,FtPinG0009423600.01.T01,FtPinG0000493900.01.T01,FtPinG0007173800.01.T01,FtPinG000272130…
Biological process	negative regulation of cell communication	GO:0010648	6	0.00112621	2.19127	19	215	500	12398	FtPinG0008141700.01.T01,FtPinG0007946400.01.T01,FtPinG0001302000.01.T01,FtPinG0003050700.01.T01,FtPinG0001519200.01.T01,FtPinG0005752600.01.T01,FtPinG0009384500.01.T01,FtPinG0001114500.01.T01,FtPinG0006421500.01.T01,FtPinG0003261200.01.T01,FtPinG0007173800.01.T01,FtPinG0005167000.01.T01,FtPinG0005918800.01.T01,FtPinG0007401700.01.T01,FtPinG0006346100.01.T01,FtPinG0006563600.01.T01,FtPinG000482710…
Biological process	negative regulation of signaling	GO:0023057	5	0.00112621	2.19127	19	215	500	12398	FtPinG0008141700.01.T01,FtPinG0007946400.01.T01,FtPinG0001302000.01.T01,FtPinG0003050700.01.T01,FtPinG0001519200.01.T01,FtPinG0005752600.01.T01,FtPinG0009384500.01.T01,FtPinG0001114500.01.T01,FtPinG0006421500.01.T01,FtPinG0003261200.01.T01,FtPinG0007173800.01.T01,FtPinG0005167000.01.T01,FtPinG0005918800.01.T01,FtPinG0007401700.01.T01,FtPinG0006346100.01.T01,FtPinG0006563600.01.T01,FtPinG000482710…
Biological process	catabolic process	GO:0009056	3	0.00119148	1.40151	78	1380	500	12398	FtPinG0004269300.01.T01,FtPinG0007990400.01.T01,FtPinG0005613800.01.T01,FtPinG0001380800.01.T01,FtPinG0009572900.01.T01,FtPinG0008534800.01.T01,FtPinG0006100300.01.T01,FtPinG0002245700.01.T01,FtPinG0009107300.01.T01,FtPinG0004668900.01.T01,FtPinG0001302000.01.T01,FtPinG0004635500.01.T01,FtPinG0003915400.01.T01,FtPinG0004701300.01.T01,FtPinG0000580500.01.T01,FtPinG0008578300.01.T01,FtPinG000697850…
Biological process	carboxylic acid catabolic process	GO:0046395	7	0.00130865	2.43098	15	153	500	12398	FtPinG0006100300.01.T01,FtPinG0005996500.01.T01,FtPinG0002747100.01.T01,FtPinG0001088000.01.T01,FtPinG0004264800.01.T01,FtPinG0001083800.01.T01,FtPinG0007311200.01.T01,FtPinG0005357600.01.T01,FtPinG0009549300.01.T01,FtPinG0007768700.01.T01,FtPinG0009711100.01.T01,FtPinG0001479200.01.T01,FtPinG0002461800.01.T01,FtPinG0007406000.01.T01,FtPinG0009276300.01.T01,
Biological process	organic acid catabolic process	GO:0016054	5	0.00130865	2.43098	15	153	500	12398	FtPinG0006100300.01.T01,FtPinG0005996500.01.T01,FtPinG0002747100.01.T01,FtPinG0001088000.01.T01,FtPinG0004264800.01.T01,FtPinG0001083800.01.T01,FtPinG0007311200.01.T01,FtPinG0005357600.01.T01,FtPinG0009549300.01.T01,FtPinG0007768700.01.T01,FtPinG0009711100.01.T01,FtPinG0001479200.01.T01,FtPinG0002461800.01.T01,FtPinG0007406000.01.T01,FtPinG0009276300.01.T01,
Biological process	organic substance catabolic process	GO:1901575	4	0.0013835	1.42623	70	1217	500	12398	FtPinG0004269300.01.T01,FtPinG0001380800.01.T01,FtPinG0009572900.01.T01,FtPinG0008534800.01.T01,FtPinG0006100300.01.T01,FtPinG0002245700.01.T01,FtPinG0009107300.01.T01,FtPinG0004668900.01.T01,FtPinG0001302000.01.T01,FtPinG0004635500.01.T01,FtPinG0003915400.01.T01,FtPinG0004701300.01.T01,FtPinG0000580500.01.T01,FtPinG0008578300.01.T01,FtPinG0006978500.01.T01,FtPinG0005008500.01.T01,FtPinG000120950…
Biological process	proteasome-mediated ubiquitin-dependent protein catabolic process	GO:0043161	10	0.00139699	1.9192	25	323	500	12398	FtPinG0004269300.01.T01,FtPinG0001380800.01.T01,FtPinG0008534800.01.T01,FtPinG0009107300.01.T01,FtPinG0004668900.01.T01,FtPinG0004701300.01.T01,FtPinG0000580500.01.T01,FtPinG0000470400.01.T01,FtPinG0000493700.01.T01,FtPinG0003996100.01.T01,FtPinG0004217100.01.T01,FtPinG0002447800.01.T01,FtPinG0005433500.01.T01,FtPinG0005952600.01.T01,FtPinG0005793100.01.T01,FtPinG0003316500.01.T01,FtPinG000648410…
Biological process	phenylpropanoid metabolic process	GO:0009698	5	0.00166676	2.23033	17	189	500	12398	FtPinG0001861600.01.T01,FtPinG0005717800.01.T01,FtPinG0006978500.01.T01,FtPinG0007387300.01.T01,FtPinG0005978600.01.T01,FtPinG0007978200.01.T01,FtPinG0002130200.01.T01,FtPinG0003079800.01.T01,FtPinG0006661400.01.T01,FtPinG0001508400.01.T01,FtPinG0007044900.01.T01,FtPinG0008694700.01.T01,FtPinG0000544600.01.T01,FtPinG0008236900.01.T01,FtPinG0009077500.01.T01,FtPinG0008794300.01.T01,FtPinG000272430…
Biological process	proteasomal protein catabolic process	GO:0010498	8	0.00194154	1.84727	26	349	500	12398	FtPinG0004269300.01.T01,FtPinG0001380800.01.T01,FtPinG0008534800.01.T01,FtPinG0009107300.01.T01,FtPinG0004668900.01.T01,FtPinG0004701300.01.T01,FtPinG0000580500.01.T01,FtPinG0000470400.01.T01,FtPinG0000493700.01.T01,FtPinG0003996100.01.T01,FtPinG0004217100.01.T01,FtPinG0000974900.01.T01,FtPinG0002447800.01.T01,FtPinG0005433500.01.T01,FtPinG0005952600.01.T01,FtPinG0005793100.01.T01,FtPinG000331650…
Biological process	cellular response to acid chemical	GO:0071229	5	0.00199014	1.77552	29	405	500	12398	FtPinG0007990400.01.T01,FtPinG0004870600.01.T01,FtPinG0006092000.01.T01,FtPinG0003050700.01.T01,FtPinG0006978500.01.T01,FtPinG0005207900.01.T01,FtPinG0007802700.01.T01,FtPinG0005752600.01.T01,FtPinG0001408600.01.T01,FtPinG0002173200.01.T01,FtPinG0000374400.01.T01,FtPinG0009384500.01.T01,FtPinG0002143600.01.T01,FtPinG0000202400.01.T01,FtPinG0004388600.01.T01,FtPinG0006421500.01.T01,FtPinG000123520…
Biological process	obsolete oxidation-reduction process	GO:0055114	0	0.00202708	1.44217	62	1066	500	12398	FtPinG0008935500.01.T01,FtPinG0005613800.01.T01,FtPinG0003223000.01.T01,FtPinG0002378800.01.T01,FtPinG0001861600.01.T01,FtPinG0006603600.01.T01,FtPinG0006100300.01.T01,FtPinG0003233400.01.T01,FtPinG0007754400.01.T01,FtPinG0000246400.01.T01,FtPinG0004548300.01.T01,FtPinG0005880800.01.T01,FtPinG0006352600.01.T01,FtPinG0005996500.01.T01,FtPinG0006479000.01.T01,FtPinG0002747100.01.T01,FtPinG000108800…
Biological process	hormone-mediated signaling pathway	GO:0009755	6	0.00207298	1.4934	53	880	500	12398	FtPinG0007990400.01.T01,FtPinG0008141700.01.T01,FtPinG0009633900.01.T01,FtPinG0004870600.01.T01,FtPinG0006100300.01.T01,FtPinG0006092000.01.T01,FtPinG0003050700.01.T01,FtPinG0005207900.01.T01,FtPinG0007802700.01.T01,FtPinG0006602200.01.T01,FtPinG0005752600.01.T01,FtPinG0001940300.01.T01,FtPinG0001408600.01.T01,FtPinG0005996500.01.T01,FtPinG0002173200.01.T01,FtPinG0000470400.01.T01,FtPinG000049370…
Biological process	regulation of signaling	GO:0023051	4	0.00223581	1.62177	38	581	500	12398	FtPinG0007990400.01.T01,FtPinG0008141700.01.T01,FtPinG0006100300.01.T01,FtPinG0006092000.01.T01,FtPinG0007946400.01.T01,FtPinG0001302000.01.T01,FtPinG0003050700.01.T01,FtPinG0006602200.01.T01,FtPinG0001519200.01.T01,FtPinG0005752600.01.T01,FtPinG0005996500.01.T01,FtPinG0000470400.01.T01,FtPinG0000493700.01.T01,FtPinG0002714200.01.T01,FtPinG0003996100.01.T01,FtPinG0009384500.01.T01,FtPinG000716470…
Biological process	response to metal ion	GO:0010038	5	0.00232563	1.60639	39	602	500	12398	FtPinG0003531300.01.T01,FtPinG0003223000.01.T01,FtPinG0008141700.01.T01,FtPinG0004106700.01.T01,FtPinG0007193700.01.T01,FtPinG0004548300.01.T01,FtPinG0000986400.01.T01,FtPinG0007297000.01.T01,FtPinG0009211600.01.T01,FtPinG0007978200.01.T01,FtPinG0000533900.01.T01,FtPinG0008690600.01.T01,FtPinG0001083800.01.T01,FtPinG0003983600.01.T01,FtPinG0005357600.01.T01,FtPinG0005725200.01.T01,FtPinG000895760…
Biological process	glutamine family amino acid metabolic process	GO:0009064	9	0.00257941	3.69302	7	47	500	12398	FtPinG0008935500.01.T01,FtPinG0003223000.01.T01,FtPinG0004264900.01.T01,FtPinG0001083800.01.T01,FtPinG0003294300.01.T01,FtPinG0002267300.01.T01,FtPinG0001060600.01.T01,
Biological process	cellular response to external stimulus	GO:0071496	4	0.00273722	1.8822	23	303	500	12398	FtPinG0008534800.01.T01,FtPinG0002336700.01.T01,FtPinG0001244600.01.T01,FtPinG0002747100.01.T01,FtPinG0000244500.01.T01,FtPinG0006547600.01.T01,FtPinG0009367100.01.T01,FtPinG0005952600.01.T01,FtPinG0004388600.01.T01,FtPinG0001478700.01.T01,FtPinG0002463600.01.T01,FtPinG0007044900.01.T01,FtPinG0008278400.01.T01,FtPinG0005943500.01.T01,FtPinG0006007500.01.T01,FtPinG0000493900.01.T01,FtPinG000226730…
Biological process	cellular response to extracellular stimulus	GO:0031668	5	0.00310531	1.89414	22	288	500	12398	FtPinG0008534800.01.T01,FtPinG0002336700.01.T01,FtPinG0001244600.01.T01,FtPinG0002747100.01.T01,FtPinG0000244500.01.T01,FtPinG0006547600.01.T01,FtPinG0009367100.01.T01,FtPinG0005952600.01.T01,FtPinG0004388600.01.T01,FtPinG0001478700.01.T01,FtPinG0002463600.01.T01,FtPinG0007044900.01.T01,FtPinG0008278400.01.T01,FtPinG0005943500.01.T01,FtPinG0006007500.01.T01,FtPinG0000493900.01.T01,FtPinG000226730…
Biological process	response to light stimulus	GO:0009416	5	0.0034312	1.49149	48	798	500	12398	FtPinG0007039000.01.T01,FtPinG0004666000.01.T01,FtPinG0002245700.01.T01,FtPinG0007946400.01.T01,FtPinG0007754400.01.T01,FtPinG0004635500.01.T01,FtPinG0008662700.01.T01,FtPinG0003050700.01.T01,FtPinG0001209500.01.T01,FtPinG0002747100.01.T01,FtPinG0002714200.01.T01,FtPinG0007575400.01.T01,FtPinG0000127800.01.T01,FtPinG0008014900.01.T01,FtPinG0007705700.01.T01,FtPinG0000345400.01.T01,FtPinG000325780…
Biological process	response to xenobiotic stimulus	GO:0009410	4	0.00346436	1.40912	62	1091	500	12398	FtPinG0001212400.01.T01,FtPinG0005728400.01.T01,FtPinG0009633900.01.T01,FtPinG0009572900.01.T01,FtPinG0008534800.01.T01,FtPinG0002265300.01.T01,FtPinG0002245700.01.T01,FtPinG0005946100.01.T01,FtPinG0007802900.01.T01,FtPinG0003125400.01.T01,FtPinG0008662700.01.T01,FtPinG0006978500.01.T01,FtPinG0000986400.01.T01,FtPinG0009107800.01.T01,FtPinG0009211600.01.T01,FtPinG0003996100.01.T01,FtPinG000340650…
Biological process	cell communication	GO:0007154	3	0.003518	1.27618	107	2079	500	12398	FtPinG0008435500.01.T01,FtPinG0007990400.01.T01,FtPinG0008141700.01.T01,FtPinG0009633900.01.T01,FtPinG0003092800.01.T01,FtPinG0009572900.01.T01,FtPinG0004870600.01.T01,FtPinG0008534800.01.T01,FtPinG0005751900.01.T01,FtPinG0006100300.01.T01,FtPinG0003706200.01.T01,FtPinG0006092000.01.T01,FtPinG0000035600.01.T01,FtPinG0008245400.01.T01,FtPinG0007946400.01.T01,FtPinG0005946100.01.T01,FtPinG000775440…
Biological process	cellular response to nutrient levels	GO:0031669	6	0.00381386	1.92965	20	257	500	12398	FtPinG0008534800.01.T01,FtPinG0002336700.01.T01,FtPinG0001244600.01.T01,FtPinG0002747100.01.T01,FtPinG0000244500.01.T01,FtPinG0006547600.01.T01,FtPinG0009367100.01.T01,FtPinG0005952600.01.T01,FtPinG0001478700.01.T01,FtPinG0002463600.01.T01,FtPinG0007044900.01.T01,FtPinG0008278400.01.T01,FtPinG0005943500.01.T01,FtPinG0006007500.01.T01,FtPinG0000493900.01.T01,FtPinG0006676600.01.T01,FtPinG000971110…
Biological process	regulation of chlorophyll metabolic process	GO:0090056	7	0.0038414	3.91516	6	38	500	12398	FtPinG0003050700.01.T01,FtPinG0007575400.01.T01,FtPinG0009420300.01.T01,FtPinG0000493900.01.T01,FtPinG0005918800.01.T01,FtPinG0007007100.01.T01,
Biological process	regulation of signal transduction	GO:0009966	6	0.0039475	1.59119	36	561	500	12398	FtPinG0007990400.01.T01,FtPinG0008141700.01.T01,FtPinG0006100300.01.T01,FtPinG0006092000.01.T01,FtPinG0007946400.01.T01,FtPinG0001302000.01.T01,FtPinG0003050700.01.T01,FtPinG0006602200.01.T01,FtPinG0001519200.01.T01,FtPinG0005752600.01.T01,FtPinG0005996500.01.T01,FtPinG0000470400.01.T01,FtPinG0000493700.01.T01,FtPinG0002714200.01.T01,FtPinG0003996100.01.T01,FtPinG0009384500.01.T01,FtPinG000716470…
Biological process	regulation of cell communication	GO:0010646	5	0.00419321	1.57367	37	583	500	12398	FtPinG0007990400.01.T01,FtPinG0008141700.01.T01,FtPinG0006100300.01.T01,FtPinG0006092000.01.T01,FtPinG0007946400.01.T01,FtPinG0001302000.01.T01,FtPinG0003050700.01.T01,FtPinG0006602200.01.T01,FtPinG0001519200.01.T01,FtPinG0005752600.01.T01,FtPinG0005996500.01.T01,FtPinG0000470400.01.T01,FtPinG0000493700.01.T01,FtPinG0002714200.01.T01,FtPinG0003996100.01.T01,FtPinG0009384500.01.T01,FtPinG000716470…
Biological process	negative regulation of response to stimulus	GO:0048585	5	0.00429203	1.72106	27	389	500	12398	FtPinG0001704600.01.T01,FtPinG0008141700.01.T01,FtPinG0007946400.01.T01,FtPinG0001302000.01.T01,FtPinG0003050700.01.T01,FtPinG0006978500.01.T01,FtPinG0005207900.01.T01,FtPinG0001519200.01.T01,FtPinG0005752600.01.T01,FtPinG0009384500.01.T01,FtPinG0001114500.01.T01,FtPinG0006421500.01.T01,FtPinG0003261200.01.T01,FtPinG0002208200.01.T01,FtPinG0002838700.01.T01,FtPinG0007173800.01.T01,FtPinG000516700…
Biological process	regulation of leaf senescence	GO:1900055	5	0.00438843	3.81477	6	39	500	12398	FtPinG0000271800.01.T01,FtPinG0004797700.01.T01,FtPinG0000176500.01.T01,FtPinG0007325700.01.T01,FtPinG0005167000.01.T01,FtPinG0006563600.01.T01,
Biological process	inositol phosphate metabolic process	GO:0043647	7	0.00476117	4.42786	5	28	500	12398	FtPinG0007802900.01.T01,FtPinG0001209500.01.T01,FtPinG0003406500.01.T01,FtPinG0001478700.01.T01,FtPinG0008630800.01.T01,
Biological process	regulation of tetrapyrrole metabolic process	GO:1901401	6	0.00499084	3.7194	6	40	500	12398	FtPinG0003050700.01.T01,FtPinG0007575400.01.T01,FtPinG0009420300.01.T01,FtPinG0000493900.01.T01,FtPinG0005918800.01.T01,FtPinG0007007100.01.T01,
Biological process	peptidyl-threonine phosphorylation	GO:0018107	10	0.00499084	3.7194	6	40	500	12398	FtPinG0005751900.01.T01,FtPinG0005752600.01.T01,FtPinG0000035900.01.T01,FtPinG0004237500.01.T01,FtPinG0006421500.01.T01,FtPinG0004387600.01.T01,
Biological process	peptidyl-threonine modification	GO:0018210	9	0.00499084	3.7194	6	40	500	12398	FtPinG0005751900.01.T01,FtPinG0005752600.01.T01,FtPinG0000035900.01.T01,FtPinG0004237500.01.T01,FtPinG0006421500.01.T01,FtPinG0004387600.01.T01,
Biological process	cellular catabolic process	GO:0044248	4	0.00547228	1.3565	68	1243	500	12398	FtPinG0004269300.01.T01,FtPinG0001380800.01.T01,FtPinG0009572900.01.T01,FtPinG0008534800.01.T01,FtPinG0006100300.01.T01,FtPinG0002245700.01.T01,FtPinG0009107300.01.T01,FtPinG0004668900.01.T01,FtPinG0001302000.01.T01,FtPinG0004635500.01.T01,FtPinG0003915400.01.T01,FtPinG0004701300.01.T01,FtPinG0000580500.01.T01,FtPinG0006978500.01.T01,FtPinG0005008500.01.T01,FtPinG0008715200.01.T01,FtPinG000599650…
Biological process	protein catabolic process	GO:0030163	6	0.00581159	1.54194	37	595	500	12398	FtPinG0004269300.01.T01,FtPinG0001380800.01.T01,FtPinG0008534800.01.T01,FtPinG0009107300.01.T01,FtPinG0004668900.01.T01,FtPinG0004635500.01.T01,FtPinG0004701300.01.T01,FtPinG0000580500.01.T01,FtPinG0008578300.01.T01,FtPinG0000470400.01.T01,FtPinG0000967400.01.T01,FtPinG0007297000.01.T01,FtPinG0000493700.01.T01,FtPinG0003996100.01.T01,FtPinG0004217100.01.T01,FtPinG0000974900.01.T01,FtPinG000244780…
Biological process	response to extracellular stimulus	GO:0009991	4	0.00581232	1.74517	24	341	500	12398	FtPinG0008534800.01.T01,FtPinG0002336700.01.T01,FtPinG0001244600.01.T01,FtPinG0001209500.01.T01,FtPinG0002747100.01.T01,FtPinG0000244500.01.T01,FtPinG0006547600.01.T01,FtPinG0009367100.01.T01,FtPinG0005952600.01.T01,FtPinG0004388600.01.T01,FtPinG0001478700.01.T01,FtPinG0002463600.01.T01,FtPinG0007044900.01.T01,FtPinG0008278400.01.T01,FtPinG0005943500.01.T01,FtPinG0006007500.01.T01,FtPinG000049390…
Biological process	cellular amino acid catabolic process	GO:0009063	8	0.00583947	2.91718	8	68	500	12398	FtPinG0002747100.01.T01,FtPinG0001088000.01.T01,FtPinG0001083800.01.T01,FtPinG0007311200.01.T01,FtPinG0009549300.01.T01,FtPinG0007768700.01.T01,FtPinG0009711100.01.T01,FtPinG0009276300.01.T01,
Biological process	positive regulation of response to alcohol	GO:1901421	6	0.00637887	2.8749	8	69	500	12398	FtPinG0006100300.01.T01,FtPinG0005996500.01.T01,FtPinG0000470400.01.T01,FtPinG0003996100.01.T01,FtPinG0005433500.01.T01,FtPinG0002143600.01.T01,FtPinG0008870900.01.T01,FtPinG0003196200.01.T01,
Biological process	positive regulation of cellular response to alcohol	GO:1905959	7	0.00637887	2.8749	8	69	500	12398	FtPinG0006100300.01.T01,FtPinG0005996500.01.T01,FtPinG0000470400.01.T01,FtPinG0003996100.01.T01,FtPinG0005433500.01.T01,FtPinG0002143600.01.T01,FtPinG0008870900.01.T01,FtPinG0003196200.01.T01,
Biological process	positive regulation of abscisic acid-activated signaling pathway	GO:0009789	8	0.00637887	2.8749	8	69	500	12398	FtPinG0006100300.01.T01,FtPinG0005996500.01.T01,FtPinG0000470400.01.T01,FtPinG0003996100.01.T01,FtPinG0005433500.01.T01,FtPinG0002143600.01.T01,FtPinG0008870900.01.T01,FtPinG0003196200.01.T01,
Biological process	glucan biosynthetic process	GO:0009250	8	0.00651884	2.50465	10	99	500	12398	FtPinG0005565800.01.T01,FtPinG0000374400.01.T01,FtPinG0006394700.01.T01,FtPinG0001910200.01.T01,FtPinG0007461700.01.T01,FtPinG0000391000.01.T01,FtPinG0002370000.01.T01,FtPinG0000615900.01.T01,FtPinG0005109900.01.T01,FtPinG0005517700.01.T01,
Biological process	phenylpropanoid biosynthetic process	GO:0009699	6	0.00691116	2.1039	14	165	500	12398	FtPinG0005717800.01.T01,FtPinG0006978500.01.T01,FtPinG0005978600.01.T01,FtPinG0007978200.01.T01,FtPinG0003079800.01.T01,FtPinG0006661400.01.T01,FtPinG0001508400.01.T01,FtPinG0007044900.01.T01,FtPinG0008694700.01.T01,FtPinG0000544600.01.T01,FtPinG0008236900.01.T01,FtPinG0009077500.01.T01,FtPinG0008794300.01.T01,FtPinG0002724300.01.T01,
Biological process	response to nutrient levels	GO:0031667	5	0.00709028	1.76541	22	309	500	12398	FtPinG0008534800.01.T01,FtPinG0002336700.01.T01,FtPinG0001244600.01.T01,FtPinG0001209500.01.T01,FtPinG0002747100.01.T01,FtPinG0000244500.01.T01,FtPinG0006547600.01.T01,FtPinG0009367100.01.T01,FtPinG0005952600.01.T01,FtPinG0001478700.01.T01,FtPinG0002463600.01.T01,FtPinG0007044900.01.T01,FtPinG0008278400.01.T01,FtPinG0005943500.01.T01,FtPinG0006007500.01.T01,FtPinG0000493900.01.T01,FtPinG000261180…
Biological process	leaf development	GO:0048366	6	0.00718065	1.63747	28	424	500	12398	FtPinG0001212400.01.T01,FtPinG0000271800.01.T01,FtPinG0004264900.01.T01,FtPinG0004064400.01.T01,FtPinG0004797700.01.T01,FtPinG0007039000.01.T01,FtPinG0004870600.01.T01,FtPinG0006087500.01.T01,FtPinG0006603600.01.T01,FtPinG0004666000.01.T01,FtPinG0007680200.01.T01,FtPinG0000176500.01.T01,FtPinG0004997500.01.T01,FtPinG0000493700.01.T01,FtPinG0008161600.01.T01,FtPinG0007325700.01.T01,FtPinG000165010…
Biological process	response to antibiotic	GO:0046677	4	0.0076491	1.68451	25	368	500	12398	FtPinG0001212400.01.T01,FtPinG0005728400.01.T01,FtPinG0005946100.01.T01,FtPinG0009107800.01.T01,FtPinG0009211600.01.T01,FtPinG0001847800.01.T01,FtPinG0000374400.01.T01,FtPinG0005725200.01.T01,FtPinG0001869900.01.T01,FtPinG0001254100.01.T01,FtPinG0001478700.01.T01,FtPinG0007325700.01.T01,FtPinG0007461700.01.T01,FtPinG0001818900.01.T01,FtPinG0007044900.01.T01,FtPinG0008433800.01.T01,FtPinG000237000…
Biological process	response to external stimulus	GO:0009605	3	0.00832391	1.2768	88	1709	500	12398	FtPinG0001212400.01.T01,FtPinG0001704600.01.T01,FtPinG0007193700.01.T01,FtPinG0003092800.01.T01,FtPinG0004870600.01.T01,FtPinG0009025300.01.T01,FtPinG0000129600.01.T01,FtPinG0005717800.01.T01,FtPinG0008534800.01.T01,FtPinG0006326300.01.T01,FtPinG0002245700.01.T01,FtPinG0008245400.01.T01,FtPinG0005946100.01.T01,FtPinG0005191900.01.T01,FtPinG0002336700.01.T01,FtPinG0006978500.01.T01,FtPinG000124460…
Biological process	response to disaccharide	GO:0034285	6	0.00914533	2.38423	10	104	500	12398	FtPinG0008141700.01.T01,FtPinG0002747100.01.T01,FtPinG0008014900.01.T01,FtPinG0001114500.01.T01,FtPinG0006640900.01.T01,FtPinG0000493900.01.T01,FtPinG0001053400.01.T01,FtPinG0009711100.01.T01,FtPinG0002136200.01.T01,FtPinG0008230700.01.T01,
Biological process	response to sucrose	GO:0009744	7	0.00914533	2.38423	10	104	500	12398	FtPinG0008141700.01.T01,FtPinG0002747100.01.T01,FtPinG0008014900.01.T01,FtPinG0001114500.01.T01,FtPinG0006640900.01.T01,FtPinG0000493900.01.T01,FtPinG0001053400.01.T01,FtPinG0009711100.01.T01,FtPinG0002136200.01.T01,FtPinG0008230700.01.T01,
Biological process	hexose metabolic process	GO:0019318	6	0.00925295	2.9419	7	59	500	12398	FtPinG0009572900.01.T01,FtPinG0000374400.01.T01,FtPinG0008957600.01.T01,FtPinG0007461700.01.T01,FtPinG0002370000.01.T01,FtPinG0005943500.01.T01,FtPinG0005517700.01.T01,
Biological process	cellular response to chemical stimulus	GO:0070887	4	0.00962778	1.25351	96	1899	500	12398	FtPinG0007990400.01.T01,FtPinG0008141700.01.T01,FtPinG0009633900.01.T01,FtPinG0009572900.01.T01,FtPinG0004870600.01.T01,FtPinG0006100300.01.T01,FtPinG0002245700.01.T01,FtPinG0006092000.01.T01,FtPinG0008245400.01.T01,FtPinG0005946100.01.T01,FtPinG0007754400.01.T01,FtPinG0007802900.01.T01,FtPinG0003125400.01.T01,FtPinG0000580500.01.T01,FtPinG0003050700.01.T01,FtPinG0006978500.01.T01,FtPinG000520790…
Biological process	response to radiation	GO:0009314	4	0.00965458	1.4102	48	844	500	12398	FtPinG0007039000.01.T01,FtPinG0004666000.01.T01,FtPinG0002245700.01.T01,FtPinG0007946400.01.T01,FtPinG0007754400.01.T01,FtPinG0004635500.01.T01,FtPinG0008662700.01.T01,FtPinG0003050700.01.T01,FtPinG0001209500.01.T01,FtPinG0002747100.01.T01,FtPinG0002714200.01.T01,FtPinG0007575400.01.T01,FtPinG0000127800.01.T01,FtPinG0008014900.01.T01,FtPinG0007705700.01.T01,FtPinG0000345400.01.T01,FtPinG000325780…
Biological process	positive regulation of response to salt stress	GO:1901002	8	0.00974946	3.75697	5	33	500	12398	FtPinG0009424400.01.T01,FtPinG0007501100.01.T01,FtPinG0005167000.01.T01,FtPinG0006563600.01.T01,FtPinG0001770900.01.T01,
Biological process	response to glucose	GO:0009749	8	0.0110488	2.84544	7	61	500	12398	FtPinG0009572900.01.T01,FtPinG0002245700.01.T01,FtPinG0003050700.01.T01,FtPinG0008014900.01.T01,FtPinG0008278400.01.T01,FtPinG0007401700.01.T01,FtPinG0008230700.01.T01,
Biological process	hyperosmotic response	GO:0006972	5	0.0110488	2.84544	7	61	500	12398	FtPinG0008935500.01.T01,FtPinG0004870600.01.T01,FtPinG0001223800.01.T01,FtPinG0000246400.01.T01,FtPinG0004237500.01.T01,FtPinG0007501100.01.T01,FtPinG0001060600.01.T01,
Biological process	response to nitrogen compound	GO:1901698	4	0.0112236	1.54043	31	499	500	12398	FtPinG0001212400.01.T01,FtPinG0003223000.01.T01,FtPinG0009633900.01.T01,FtPinG0008534800.01.T01,FtPinG0002265300.01.T01,FtPinG0006575700.01.T01,FtPinG0005946100.01.T01,FtPinG0008662700.01.T01,FtPinG0000580500.01.T01,FtPinG0003050700.01.T01,FtPinG0006978500.01.T01,FtPinG0003996100.01.T01,FtPinG0000974900.01.T01,FtPinG0003257800.01.T01,FtPinG0005952600.01.T01,FtPinG0003316500.01.T01,FtPinG000648410…
Biological process	chlorophyll metabolic process	GO:0015994	7	0.0112754	2.61011	8	76	500	12398	FtPinG0003050700.01.T01,FtPinG0007575400.01.T01,FtPinG0001295500.01.T01,FtPinG0009420300.01.T01,FtPinG0000493900.01.T01,FtPinG0005918800.01.T01,FtPinG0004547800.01.T01,FtPinG0007007100.01.T01,
Biological process	cellular protein catabolic process	GO:0044257	7	0.0119873	1.50972	33	542	500	12398	FtPinG0004269300.01.T01,FtPinG0001380800.01.T01,FtPinG0008534800.01.T01,FtPinG0009107300.01.T01,FtPinG0004668900.01.T01,FtPinG0004635500.01.T01,FtPinG0004701300.01.T01,FtPinG0000580500.01.T01,FtPinG0000470400.01.T01,FtPinG0000967400.01.T01,FtPinG0000493700.01.T01,FtPinG0003996100.01.T01,FtPinG0004217100.01.T01,FtPinG0000974900.01.T01,FtPinG0002447800.01.T01,FtPinG0002253700.01.T01,FtPinG000450230…
Biological process	regulation of chlorophyll biosynthetic process	GO:0010380	8	0.0124874	3.54229	5	35	500	12398	FtPinG0003050700.01.T01,FtPinG0007575400.01.T01,FtPinG0009420300.01.T01,FtPinG0005918800.01.T01,FtPinG0007007100.01.T01,
Biological process	response to toxic substance	GO:0009636	4	0.0126577	1.65307	23	345	500	12398	FtPinG0001212400.01.T01,FtPinG0009211600.01.T01,FtPinG0000533900.01.T01,FtPinG0002482700.01.T01,FtPinG0009530300.01.T01,FtPinG0005725200.01.T01,FtPinG0001869900.01.T01,FtPinG0006668900.01.T01,FtPinG0001254100.01.T01,FtPinG0001478700.01.T01,FtPinG0007501100.01.T01,FtPinG0007461700.01.T01,FtPinG0001818900.01.T01,FtPinG0008433800.01.T01,FtPinG0002370000.01.T01,FtPinG0001235200.01.T01,FtPinG000272130…
Biological process	oxoacid metabolic process	GO:0043436	5	0.0132959	1.35904	53	967	500	12398	FtPinG0008935500.01.T01,FtPinG0003223000.01.T01,FtPinG0004264900.01.T01,FtPinG0008141700.01.T01,FtPinG0009572900.01.T01,FtPinG0006100300.01.T01,FtPinG0003233400.01.T01,FtPinG0002245700.01.T01,FtPinG0006575700.01.T01,FtPinG0007754400.01.T01,FtPinG0001302000.01.T01,FtPinG0000246400.01.T01,FtPinG0006978500.01.T01,FtPinG0005008500.01.T01,FtPinG0005996500.01.T01,FtPinG0002747100.01.T01,FtPinG000108800…
Biological process	regulation of response to salt stress	GO:1901000	7	0.0134213	3.03624	6	49	500	12398	FtPinG0009424400.01.T01,FtPinG0005207900.01.T01,FtPinG0007501100.01.T01,FtPinG0005167000.01.T01,FtPinG0006563600.01.T01,FtPinG0001770900.01.T01,
Biological process	polyol metabolic process	GO:0019751	6	0.0134213	3.03624	6	49	500	12398	FtPinG0007802900.01.T01,FtPinG0001209500.01.T01,FtPinG0003406500.01.T01,FtPinG0001083800.01.T01,FtPinG0001478700.01.T01,FtPinG0008630800.01.T01,
Biological process	carboxylic acid metabolic process	GO:0019752	6	0.0135151	1.37756	49	882	500	12398	FtPinG0008935500.01.T01,FtPinG0003223000.01.T01,FtPinG0004264900.01.T01,FtPinG0008141700.01.T01,FtPinG0009572900.01.T01,FtPinG0006100300.01.T01,FtPinG0003233400.01.T01,FtPinG0002245700.01.T01,FtPinG0007754400.01.T01,FtPinG0001302000.01.T01,FtPinG0000246400.01.T01,FtPinG0005996500.01.T01,FtPinG0002747100.01.T01,FtPinG0001088000.01.T01,FtPinG0002952800.01.T01,FtPinG0000244500.01.T01,FtPinG000399610…
Biological process	monocarboxylic acid metabolic process	GO:0032787	7	0.0139825	1.53979	29	467	500	12398	FtPinG0009572900.01.T01,FtPinG0006100300.01.T01,FtPinG0002245700.01.T01,FtPinG0007754400.01.T01,FtPinG0001302000.01.T01,FtPinG0000246400.01.T01,FtPinG0005996500.01.T01,FtPinG0002747100.01.T01,FtPinG0002952800.01.T01,FtPinG0000244500.01.T01,FtPinG0003996100.01.T01,FtPinG0002364100.01.T01,FtPinG0004264800.01.T01,FtPinG0001083800.01.T01,FtPinG0006867700.01.T01,FtPinG0000639400.01.T01,FtPinG000895760…
Biological process	regulation of tetrapyrrole biosynthetic process	GO:1901463	7	0.0140336	3.44389	5	36	500	12398	FtPinG0003050700.01.T01,FtPinG0007575400.01.T01,FtPinG0009420300.01.T01,FtPinG0005918800.01.T01,FtPinG0007007100.01.T01,
Biological process	organic acid metabolic process	GO:0006082	4	0.0140546	1.35483	53	970	500	12398	FtPinG0008935500.01.T01,FtPinG0003223000.01.T01,FtPinG0004264900.01.T01,FtPinG0008141700.01.T01,FtPinG0009572900.01.T01,FtPinG0006100300.01.T01,FtPinG0003233400.01.T01,FtPinG0002245700.01.T01,FtPinG0006575700.01.T01,FtPinG0007754400.01.T01,FtPinG0001302000.01.T01,FtPinG0000246400.01.T01,FtPinG0006978500.01.T01,FtPinG0005008500.01.T01,FtPinG0005996500.01.T01,FtPinG0002747100.01.T01,FtPinG000108800…
Biological process	obsolete regulation of cofactor metabolic process	GO:0051193	0	0.0141978	2.71206	7	64	500	12398	FtPinG0001302000.01.T01,FtPinG0003050700.01.T01,FtPinG0007575400.01.T01,FtPinG0009420300.01.T01,FtPinG0000493900.01.T01,FtPinG0005918800.01.T01,FtPinG0007007100.01.T01,
Biological process	dicarboxylic acid metabolic process	GO:0043648	7	0.0141978	2.71206	7	64	500	12398	FtPinG0003223000.01.T01,FtPinG0004264900.01.T01,FtPinG0002364100.01.T01,FtPinG0001083800.01.T01,FtPinG0005357600.01.T01,FtPinG0003294300.01.T01,FtPinG0007242500.01.T01,
Biological process	proteolysis involved in cellular protein catabolic process	GO:0051603	7	0.0144239	1.49995	32	529	500	12398	FtPinG0004269300.01.T01,FtPinG0001380800.01.T01,FtPinG0008534800.01.T01,FtPinG0009107300.01.T01,FtPinG0004668900.01.T01,FtPinG0004701300.01.T01,FtPinG0000580500.01.T01,FtPinG0000470400.01.T01,FtPinG0000967400.01.T01,FtPinG0000493700.01.T01,FtPinG0003996100.01.T01,FtPinG0004217100.01.T01,FtPinG0000974900.01.T01,FtPinG0002447800.01.T01,FtPinG0002253700.01.T01,FtPinG0004502300.01.T01,FtPinG000543350…
Biological process	ubiquitin-dependent protein catabolic process	GO:0006511	9	0.0152156	1.55696	27	430	500	12398	FtPinG0004269300.01.T01,FtPinG0001380800.01.T01,FtPinG0008534800.01.T01,FtPinG0009107300.01.T01,FtPinG0004668900.01.T01,FtPinG0004701300.01.T01,FtPinG0000580500.01.T01,FtPinG0000470400.01.T01,FtPinG0000493700.01.T01,FtPinG0003996100.01.T01,FtPinG0004217100.01.T01,FtPinG0002447800.01.T01,FtPinG0005433500.01.T01,FtPinG0005952600.01.T01,FtPinG0005793100.01.T01,FtPinG0003316500.01.T01,FtPinG000648410…
Biological process	tetrapyrrole metabolic process	GO:0033013	5	0.0152469	2.32462	9	96	500	12398	FtPinG0003050700.01.T01,FtPinG0007575400.01.T01,FtPinG0001295500.01.T01,FtPinG0009420300.01.T01,FtPinG0000493900.01.T01,FtPinG0003111900.01.T01,FtPinG0005918800.01.T01,FtPinG0004547800.01.T01,FtPinG0007007100.01.T01,
Biological process	cellular response to abiotic stimulus	GO:0071214	5	0.0155135	1.8597	15	200	500	12398	FtPinG0007946400.01.T01,FtPinG0008662700.01.T01,FtPinG0002714200.01.T01,FtPinG0007575400.01.T01,FtPinG0008014900.01.T01,FtPinG0004388600.01.T01,FtPinG0009565900.01.T01,FtPinG0006431700.01.T01,FtPinG0002267300.01.T01,FtPinG0003111900.01.T01,FtPinG0007173800.01.T01,FtPinG0004759200.01.T01,FtPinG0007162600.01.T01,FtPinG0005087800.01.T01,FtPinG0003755700.01.T01,
Biological process	cellular response to environmental stimulus	GO:0104004	4	0.0155135	1.8597	15	200	500	12398	FtPinG0007946400.01.T01,FtPinG0008662700.01.T01,FtPinG0002714200.01.T01,FtPinG0007575400.01.T01,FtPinG0008014900.01.T01,FtPinG0004388600.01.T01,FtPinG0009565900.01.T01,FtPinG0006431700.01.T01,FtPinG0002267300.01.T01,FtPinG0003111900.01.T01,FtPinG0007173800.01.T01,FtPinG0004759200.01.T01,FtPinG0007162600.01.T01,FtPinG0005087800.01.T01,FtPinG0003755700.01.T01,
Biological process	cuticle development	GO:0042335	4	0.0157035	3.35081	5	37	500	12398	FtPinG0000129600.01.T01,FtPinG0005880800.01.T01,FtPinG0005881100.01.T01,FtPinG0003167000.01.T01,FtPinG0000345200.01.T01,
Biological process	nucleoside diphosphate phosphorylation	GO:0006165	9	0.0161629	2.91718	6	51	500	12398	FtPinG0009572900.01.T01,FtPinG0002245700.01.T01,FtPinG0001302000.01.T01,FtPinG0006867700.01.T01,FtPinG0001869900.01.T01,FtPinG0008505600.01.T01,
Biological process	response to chitin	GO:0010200	6	0.0169578	1.88665	14	184	500	12398	FtPinG0001212400.01.T01,FtPinG0009633900.01.T01,FtPinG0008534800.01.T01,FtPinG0002265300.01.T01,FtPinG0005946100.01.T01,FtPinG0008662700.01.T01,FtPinG0003996100.01.T01,FtPinG0005952600.01.T01,FtPinG0006484100.01.T01,FtPinG0003023300.01.T01,FtPinG0005880600.01.T01,FtPinG0008918300.01.T01,FtPinG0007629700.01.T01,FtPinG0007647500.01.T01,
Biological process	modification-dependent protein catabolic process	GO:0019941	8	0.0169668	1.54261	27	434	500	12398	FtPinG0004269300.01.T01,FtPinG0001380800.01.T01,FtPinG0008534800.01.T01,FtPinG0009107300.01.T01,FtPinG0004668900.01.T01,FtPinG0004701300.01.T01,FtPinG0000580500.01.T01,FtPinG0000470400.01.T01,FtPinG0000493700.01.T01,FtPinG0003996100.01.T01,FtPinG0004217100.01.T01,FtPinG0002447800.01.T01,FtPinG0005433500.01.T01,FtPinG0005952600.01.T01,FtPinG0005793100.01.T01,FtPinG0003316500.01.T01,FtPinG000648410…
Biological process	alcohol metabolic process	GO:0006066	5	0.0174	1.99699	12	149	500	12398	FtPinG0007754400.01.T01,FtPinG0007802900.01.T01,FtPinG0003125400.01.T01,FtPinG0000246400.01.T01,FtPinG0001209500.01.T01,FtPinG0003996100.01.T01,FtPinG0003406500.01.T01,FtPinG0001083800.01.T01,FtPinG0004688400.01.T01,FtPinG0001478700.01.T01,FtPinG0003175900.01.T01,FtPinG0008630800.01.T01,
Biological process	small molecule metabolic process	GO:0044281	3	0.0174664	1.27204	73	1423	500	12398	FtPinG0008935500.01.T01,FtPinG0003223000.01.T01,FtPinG0004264900.01.T01,FtPinG0008141700.01.T01,FtPinG0009572900.01.T01,FtPinG0006100300.01.T01,FtPinG0003233400.01.T01,FtPinG0002245700.01.T01,FtPinG0006575700.01.T01,FtPinG0007754400.01.T01,FtPinG0001302000.01.T01,FtPinG0007140300.01.T01,FtPinG0007802900.01.T01,FtPinG0003125400.01.T01,FtPinG0000246400.01.T01,FtPinG0006978500.01.T01,FtPinG000500850…
Biological process	hyperosmotic salinity response	GO:0042538	6	0.017669	2.86108	6	52	500	12398	FtPinG0008935500.01.T01,FtPinG0004870600.01.T01,FtPinG0001223800.01.T01,FtPinG0000246400.01.T01,FtPinG0004237500.01.T01,FtPinG0007501100.01.T01,
Biological process	anatomical structure maturation	GO:0071695	4	0.0182558	1.82324	15	204	500	12398	FtPinG0006087500.01.T01,FtPinG0000246400.01.T01,FtPinG0004997500.01.T01,FtPinG0006680200.01.T01,FtPinG0006867700.01.T01,FtPinG0008844900.01.T01,FtPinG0000050100.01.T01,FtPinG0008505600.01.T01,FtPinG0007501100.01.T01,FtPinG0003175900.01.T01,FtPinG0006640900.01.T01,FtPinG0003149600.01.T01,FtPinG0002461800.01.T01,FtPinG0006346100.01.T01,FtPinG0008230700.01.T01,
Biological process	fatty acid metabolic process	GO:0006631	8	0.019328	1.77114	16	224	500	12398	FtPinG0006100300.01.T01,FtPinG0005996500.01.T01,FtPinG0002952800.01.T01,FtPinG0000244500.01.T01,FtPinG0004264800.01.T01,FtPinG0000639400.01.T01,FtPinG0008957600.01.T01,FtPinG0001003800.01.T01,FtPinG0009149300.01.T01,FtPinG0007242500.01.T01,FtPinG0007768700.01.T01,FtPinG0003448100.01.T01,FtPinG0008694700.01.T01,FtPinG0001479200.01.T01,FtPinG0004464800.01.T01,FtPinG0009084100.01.T01,
Biological process	negative regulation of post-embryonic development	GO:0048581	7	0.0197403	2.11932	10	117	500	12398	FtPinG0003050700.01.T01,FtPinG0005793100.01.T01,FtPinG0003310400.01.T01,FtPinG0002318100.01.T01,FtPinG0002208200.01.T01,FtPinG0007173800.01.T01,FtPinG0004508000.01.T01,FtPinG0002461800.01.T01,FtPinG0006346100.01.T01,FtPinG0001785400.01.T01,
Biological process	lignin metabolic process	GO:0009808	6	0.0197618	2.36152	8	84	500	12398	FtPinG0001861600.01.T01,FtPinG0006978500.01.T01,FtPinG0003079800.01.T01,FtPinG0006661400.01.T01,FtPinG0001508400.01.T01,FtPinG0007044900.01.T01,FtPinG0009077500.01.T01,FtPinG0002724300.01.T01,
Biological process	cellular response to cold	GO:0070417	6	0.0214916	3.0995	5	40	500	12398	FtPinG0006484100.01.T01,FtPinG0005020100.01.T01,FtPinG0000493900.01.T01,FtPinG0005880600.01.T01,FtPinG0003755700.01.T01,
Biological process	nucleotide phosphorylation	GO:0046939	7	0.0227579	2.70502	6	55	500	12398	FtPinG0009572900.01.T01,FtPinG0002245700.01.T01,FtPinG0001302000.01.T01,FtPinG0006867700.01.T01,FtPinG0001869900.01.T01,FtPinG0008505600.01.T01,
Biological process	regulation of leaf development	GO:2000024	5	0.0239438	2.44468	7	71	500	12398	FtPinG0000271800.01.T01,FtPinG0004797700.01.T01,FtPinG0000176500.01.T01,FtPinG0007325700.01.T01,FtPinG0007173800.01.T01,FtPinG0005167000.01.T01,FtPinG0006563600.01.T01,
Biological process	nucleoside diphosphate metabolic process	GO:0009132	8	0.0246521	2.65671	6	56	500	12398	FtPinG0009572900.01.T01,FtPinG0002245700.01.T01,FtPinG0001302000.01.T01,FtPinG0006867700.01.T01,FtPinG0001869900.01.T01,FtPinG0008505600.01.T01,
Biological process	positive chemotaxis	GO:0050918	5	0.0260318	2.9519	5	42	500	12398	FtPinG0003092800.01.T01,FtPinG0005191900.01.T01,FtPinG0003406500.01.T01,FtPinG0001083800.01.T01,FtPinG0003165000.01.T01,
Biological process	L-alpha-amino acid transmembrane transport	GO:1902475	10	0.0260318	2.9519	5	42	500	12398	FtPinG0007387500.01.T01,FtPinG0004377600.01.T01,FtPinG0001940300.01.T01,FtPinG0006565700.01.T01,FtPinG0001060600.01.T01,
Biological process	pollen tube guidance	GO:0010183	6	0.0260318	2.9519	5	42	500	12398	FtPinG0003092800.01.T01,FtPinG0005191900.01.T01,FtPinG0003406500.01.T01,FtPinG0001083800.01.T01,FtPinG0003165000.01.T01,
Biological process	L-amino acid transport	GO:0015807	9	0.0260318	2.9519	5	42	500	12398	FtPinG0007387500.01.T01,FtPinG0004377600.01.T01,FtPinG0001940300.01.T01,FtPinG0006565700.01.T01,FtPinG0001060600.01.T01,
Biological process	chlorophyll biosynthetic process	GO:0015995	8	0.0266488	2.61011	6	57	500	12398	FtPinG0003050700.01.T01,FtPinG0007575400.01.T01,FtPinG0009420300.01.T01,FtPinG0005918800.01.T01,FtPinG0004547800.01.T01,FtPinG0007007100.01.T01,
Biological process	modification-dependent macromolecule catabolic process	GO:0043632	7	0.0269194	1.48118	27	452	500	12398	FtPinG0004269300.01.T01,FtPinG0001380800.01.T01,FtPinG0008534800.01.T01,FtPinG0009107300.01.T01,FtPinG0004668900.01.T01,FtPinG0004701300.01.T01,FtPinG0000580500.01.T01,FtPinG0000470400.01.T01,FtPinG0000493700.01.T01,FtPinG0003996100.01.T01,FtPinG0004217100.01.T01,FtPinG0002447800.01.T01,FtPinG0005433500.01.T01,FtPinG0005952600.01.T01,FtPinG0005793100.01.T01,FtPinG0003316500.01.T01,FtPinG000648410…
Biological process	cellular response to light stimulus	GO:0071482	7	0.0272415	2.10532	9	106	500	12398	FtPinG0007946400.01.T01,FtPinG0008662700.01.T01,FtPinG0002714200.01.T01,FtPinG0007575400.01.T01,FtPinG0008014900.01.T01,FtPinG0006431700.01.T01,FtPinG0003111900.01.T01,FtPinG0004759200.01.T01,FtPinG0007162600.01.T01,
Biological process	cellular glucan metabolic process	GO:0006073	7	0.027344	1.8714	12	159	500	12398	FtPinG0005565800.01.T01,FtPinG0000374400.01.T01,FtPinG0006394700.01.T01,FtPinG0001910200.01.T01,FtPinG0008014900.01.T01,FtPinG0008844900.01.T01,FtPinG0007461700.01.T01,FtPinG0000391000.01.T01,FtPinG0002370000.01.T01,FtPinG0000615900.01.T01,FtPinG0005109900.01.T01,FtPinG0005517700.01.T01,
Biological process	tetrapyrrole biosynthetic process	GO:0033014	6	0.0274095	2.3777	7	73	500	12398	FtPinG0003050700.01.T01,FtPinG0007575400.01.T01,FtPinG0009420300.01.T01,FtPinG0003111900.01.T01,FtPinG0005918800.01.T01,FtPinG0004547800.01.T01,FtPinG0007007100.01.T01,
Biological process	defense response to fungus	GO:0050832	7	0.027948	1.56842	21	332	500	12398	FtPinG0000129600.01.T01,FtPinG0008245400.01.T01,FtPinG0006978500.01.T01,FtPinG0008690600.01.T01,FtPinG0005357600.01.T01,FtPinG0004237500.01.T01,FtPinG0003333000.01.T01,FtPinG0001478700.01.T01,FtPinG0007325700.01.T01,FtPinG0002619800.01.T01,FtPinG0005943500.01.T01,FtPinG0004098000.01.T01,FtPinG0002838700.01.T01,FtPinG0005167000.01.T01,FtPinG0007401700.01.T01,FtPinG0008853700.01.T01,FtPinG000656360…
Biological process	response to organonitrogen compound	GO:0010243	5	0.0279653	1.54975	22	352	500	12398	FtPinG0001212400.01.T01,FtPinG0009633900.01.T01,FtPinG0008534800.01.T01,FtPinG0002265300.01.T01,FtPinG0005946100.01.T01,FtPinG0008662700.01.T01,FtPinG0000580500.01.T01,FtPinG0006978500.01.T01,FtPinG0003996100.01.T01,FtPinG0000974900.01.T01,FtPinG0005952600.01.T01,FtPinG0003316500.01.T01,FtPinG0006484100.01.T01,FtPinG0002611800.01.T01,FtPinG0002838700.01.T01,FtPinG0003023300.01.T01,FtPinG000588060…
Biological process	lipid metabolic process	GO:0006629	4	0.028097	1.33094	46	857	500	12398	FtPinG0008141700.01.T01,FtPinG0002511700.01.T01,FtPinG0002378800.01.T01,FtPinG0006100300.01.T01,FtPinG0003233400.01.T01,FtPinG0007754400.01.T01,FtPinG0001302000.01.T01,FtPinG0007140300.01.T01,FtPinG0000217100.01.T01,FtPinG0003125400.01.T01,FtPinG0000246400.01.T01,FtPinG0005880800.01.T01,FtPinG0006486100.01.T01,FtPinG0005996500.01.T01,FtPinG0002952800.01.T01,FtPinG0000244500.01.T01,FtPinG000399610…
Biological process	flavonoid metabolic process	GO:0009812	4	0.0286044	1.92082	11	142	500	12398	FtPinG0003079800.01.T01,FtPinG0003257800.01.T01,FtPinG0001508400.01.T01,FtPinG0007769400.01.T01,FtPinG0008145300.01.T01,FtPinG0003111900.01.T01,FtPinG0008251700.01.T01,FtPinG0005918800.01.T01,FtPinG0004759200.01.T01,FtPinG0002221300.01.T01,FtPinG0007007100.01.T01,
Biological process	fruit development	GO:0010154	5	0.029224	1.35371	41	751	500	12398	FtPinG0008935500.01.T01,FtPinG0007990400.01.T01,FtPinG0006087500.01.T01,FtPinG0005946100.01.T01,FtPinG0005191900.01.T01,FtPinG0007802900.01.T01,FtPinG0000246400.01.T01,FtPinG0003050700.01.T01,FtPinG0000176500.01.T01,FtPinG0004997500.01.T01,FtPinG0003406500.01.T01,FtPinG0004425400.01.T01,FtPinG0006680200.01.T01,FtPinG0001083800.01.T01,FtPinG0008844900.01.T01,FtPinG0005357600.01.T01,FtPinG000005010…
Biological process	response to gibberellin	GO:0009739	6	0.0304371	1.79082	13	180	500	12398	FtPinG0007990400.01.T01,FtPinG0003197500.01.T01,FtPinG0003050700.01.T01,FtPinG0003996100.01.T01,FtPinG0001847800.01.T01,FtPinG0000533900.01.T01,FtPinG0002208200.01.T01,FtPinG0001053400.01.T01,FtPinG0007173800.01.T01,FtPinG0004759200.01.T01,FtPinG0006346100.01.T01,FtPinG0008236900.01.T01,FtPinG0007163600.01.T01,
Biological process	multicellular organismal reproductive process	GO:0048609	3	0.0306642	1.67399	16	237	500	12398	FtPinG0000246400.01.T01,FtPinG0005880800.01.T01,FtPinG0006680200.01.T01,FtPinG0008844900.01.T01,FtPinG0000050100.01.T01,FtPinG0005881100.01.T01,FtPinG0008505600.01.T01,FtPinG0007501100.01.T01,FtPinG0003175900.01.T01,FtPinG0003149600.01.T01,FtPinG0002721300.01.T01,FtPinG0002461800.01.T01,FtPinG0000810700.01.T01,FtPinG0006346100.01.T01,FtPinG0000639900.01.T01,FtPinG0008230700.01.T01,
Biological process	glycolytic process	GO:0006096	13	0.0311425	2.81773	5	44	500	12398	FtPinG0009572900.01.T01,FtPinG0002245700.01.T01,FtPinG0001302000.01.T01,FtPinG0006867700.01.T01,FtPinG0008505600.01.T01,
Biological process	ATP generation from ADP	GO:0006757	12	0.0311425	2.81773	5	44	500	12398	FtPinG0009572900.01.T01,FtPinG0002245700.01.T01,FtPinG0001302000.01.T01,FtPinG0006867700.01.T01,FtPinG0008505600.01.T01,
Biological process	lignin biosynthetic process	GO:0009809	7	0.031201	2.31429	7	75	500	12398	FtPinG0006978500.01.T01,FtPinG0003079800.01.T01,FtPinG0006661400.01.T01,FtPinG0001508400.01.T01,FtPinG0007044900.01.T01,FtPinG0009077500.01.T01,FtPinG0002724300.01.T01,
Biological process	multicellular organism reproduction	GO:0032504	3	0.0313202	1.6402	17	257	500	12398	FtPinG0000246400.01.T01,FtPinG0005880800.01.T01,FtPinG0006680200.01.T01,FtPinG0008844900.01.T01,FtPinG0000050100.01.T01,FtPinG0005881100.01.T01,FtPinG0008505600.01.T01,FtPinG0007501100.01.T01,FtPinG0003175900.01.T01,FtPinG0006839100.01.T01,FtPinG0003149600.01.T01,FtPinG0002721300.01.T01,FtPinG0002461800.01.T01,FtPinG0000810700.01.T01,FtPinG0006346100.01.T01,FtPinG0000639900.01.T01,FtPinG000823070…
Biological process	pigment metabolic process	GO:0042440	3	0.0316405	1.78093	13	181	500	12398	FtPinG0007754400.01.T01,FtPinG0003050700.01.T01,FtPinG0007575400.01.T01,FtPinG0007769400.01.T01,FtPinG0001295500.01.T01,FtPinG0009420300.01.T01,FtPinG0000493900.01.T01,FtPinG0003111900.01.T01,FtPinG0005918800.01.T01,FtPinG0004759200.01.T01,FtPinG0004547800.01.T01,FtPinG0002221300.01.T01,FtPinG0007007100.01.T01,
Biological process	regulation of ion transport	GO:0043269	6	0.033272	2.4796	6	60	500	12398	FtPinG0001302000.01.T01,FtPinG0005207900.01.T01,FtPinG0006484100.01.T01,FtPinG0000493900.01.T01,FtPinG0009342600.01.T01,FtPinG0005880600.01.T01,
Biological process	porphyrin-containing compound metabolic process	GO:0006778	6	0.033867	2.13299	8	93	500	12398	FtPinG0003050700.01.T01,FtPinG0007575400.01.T01,FtPinG0001295500.01.T01,FtPinG0009420300.01.T01,FtPinG0000493900.01.T01,FtPinG0005918800.01.T01,FtPinG0004547800.01.T01,FtPinG0007007100.01.T01,
Biological process	ADP metabolic process	GO:0046031	11	0.0339173	2.75511	5	45	500	12398	FtPinG0009572900.01.T01,FtPinG0002245700.01.T01,FtPinG0001302000.01.T01,FtPinG0006867700.01.T01,FtPinG0008505600.01.T01,
Biological process	monocarboxylic acid biosynthetic process	GO:0072330	8	0.0349826	1.64621	16	241	500	12398	FtPinG0009572900.01.T01,FtPinG0006100300.01.T01,FtPinG0002245700.01.T01,FtPinG0007754400.01.T01,FtPinG0000246400.01.T01,FtPinG0005996500.01.T01,FtPinG0002747100.01.T01,FtPinG0006867700.01.T01,FtPinG0000639400.01.T01,FtPinG0008957600.01.T01,FtPinG0008505600.01.T01,FtPinG0001003800.01.T01,FtPinG0007242500.01.T01,FtPinG0003448100.01.T01,FtPinG0004464800.01.T01,FtPinG0009084100.01.T01,
Biological process	glucan metabolic process	GO:0044042	6	0.0350052	1.80335	12	165	500	12398	FtPinG0005565800.01.T01,FtPinG0000374400.01.T01,FtPinG0006394700.01.T01,FtPinG0001910200.01.T01,FtPinG0008014900.01.T01,FtPinG0008844900.01.T01,FtPinG0007461700.01.T01,FtPinG0000391000.01.T01,FtPinG0002370000.01.T01,FtPinG0000615900.01.T01,FtPinG0005109900.01.T01,FtPinG0005517700.01.T01,
Biological process	signaling	GO:0023052	2	0.0354689	1.19937	89	1840	500	12398	FtPinG0008435500.01.T01,FtPinG0007990400.01.T01,FtPinG0008141700.01.T01,FtPinG0009633900.01.T01,FtPinG0003092800.01.T01,FtPinG0009572900.01.T01,FtPinG0004870600.01.T01,FtPinG0005751900.01.T01,FtPinG0006100300.01.T01,FtPinG0003706200.01.T01,FtPinG0006092000.01.T01,FtPinG0000035600.01.T01,FtPinG0008245400.01.T01,FtPinG0007946400.01.T01,FtPinG0005946100.01.T01,FtPinG0007754400.01.T01,FtPinG000130200…
Biological process	organic hydroxy compound biosynthetic process	GO:1901617	5	0.0355521	1.71007	14	203	500	12398	FtPinG0002378800.01.T01,FtPinG0007754400.01.T01,FtPinG0007802900.01.T01,FtPinG0000246400.01.T01,FtPinG0003406500.01.T01,FtPinG0001478700.01.T01,FtPinG0003175900.01.T01,FtPinG0007959300.01.T01,FtPinG0008630800.01.T01,FtPinG0000544600.01.T01,FtPinG0002221300.01.T01,FtPinG0009276300.01.T01,FtPinG0003229300.01.T01,FtPinG0008794300.01.T01,
Biological process	negative regulation of reproductive process	GO:2000242	5	0.0375229	2.22528	7	78	500	12398	FtPinG0003050700.01.T01,FtPinG0002208200.01.T01,FtPinG0007173800.01.T01,FtPinG0004508000.01.T01,FtPinG0002461800.01.T01,FtPinG0006346100.01.T01,FtPinG0001785400.01.T01,
Biological process	cellular response to red or far red light	GO:0071489	8	0.0399144	2.63787	5	47	500	12398	FtPinG0007946400.01.T01,FtPinG0008662700.01.T01,FtPinG0002714200.01.T01,FtPinG0007575400.01.T01,FtPinG0004759200.01.T01,
Biological process	obsolete positive regulation of multi-organism process	GO:0043902	0	0.0399144	2.63787	5	47	500	12398	FtPinG0007990400.01.T01,FtPinG0003141500.01.T01,FtPinG0007164700.01.T01,FtPinG0000202400.01.T01,FtPinG0004459000.01.T01,
Biological process	response to karrikin	GO:0080167	4	0.0408035	1.87848	10	132	500	12398	FtPinG0006247600.01.T01,FtPinG0003996100.01.T01,FtPinG0007575400.01.T01,FtPinG0008145300.01.T01,FtPinG0009492400.01.T01,FtPinG0008173500.01.T01,FtPinG0004759200.01.T01,FtPinG0000639900.01.T01,FtPinG0009077500.01.T01,FtPinG0007962000.01.T01,
Biological process	defense response	GO:0006952	4	0.0413249	1.26005	56	1102	500	12398	FtPinG0001212400.01.T01,FtPinG0001704600.01.T01,FtPinG0007193700.01.T01,FtPinG0009025300.01.T01,FtPinG0000129600.01.T01,FtPinG0008534800.01.T01,FtPinG0003706200.01.T01,FtPinG0006326300.01.T01,FtPinG0006092000.01.T01,FtPinG0008245400.01.T01,FtPinG0005946100.01.T01,FtPinG0002730600.01.T01,FtPinG0006978500.01.T01,FtPinG0001244600.01.T01,FtPinG0000907700.01.T01,FtPinG0008690600.01.T01,FtPinG000120970…
Biological process	regulation of post-embryonic development	GO:0048580	6	0.0417047	1.40172	29	513	500	12398	FtPinG0000271800.01.T01,FtPinG0008141700.01.T01,FtPinG0009633900.01.T01,FtPinG0004797700.01.T01,FtPinG0008662700.01.T01,FtPinG0003050700.01.T01,FtPinG0001405800.01.T01,FtPinG0001847800.01.T01,FtPinG0007575400.01.T01,FtPinG0002363800.01.T01,FtPinG0004578000.01.T01,FtPinG0005357600.01.T01,FtPinG0005793100.01.T01,FtPinG0006484100.01.T01,FtPinG0006640900.01.T01,FtPinG0003310400.01.T01,FtPinG000231810…
Biological process	monosaccharide metabolic process	GO:0005996	5	0.0419055	2.04503	8	97	500	12398	FtPinG0009572900.01.T01,FtPinG0000374400.01.T01,FtPinG0009214900.01.T01,FtPinG0008957600.01.T01,FtPinG0007461700.01.T01,FtPinG0002370000.01.T01,FtPinG0005943500.01.T01,FtPinG0005517700.01.T01,
Biological process	purine nucleoside diphosphate metabolic process	GO:0009135	9	0.0431393	2.58292	5	48	500	12398	FtPinG0009572900.01.T01,FtPinG0002245700.01.T01,FtPinG0001302000.01.T01,FtPinG0006867700.01.T01,FtPinG0008505600.01.T01,
Biological process	purine ribonucleoside diphosphate metabolic process	GO:0009179	10	0.0431393	2.58292	5	48	500	12398	FtPinG0009572900.01.T01,FtPinG0002245700.01.T01,FtPinG0001302000.01.T01,FtPinG0006867700.01.T01,FtPinG0008505600.01.T01,
Biological process	developmental maturation	GO:0021700	3	0.0458896	1.61713	15	230	500	12398	FtPinG0006087500.01.T01,FtPinG0000246400.01.T01,FtPinG0004997500.01.T01,FtPinG0006680200.01.T01,FtPinG0006867700.01.T01,FtPinG0008844900.01.T01,FtPinG0000050100.01.T01,FtPinG0008505600.01.T01,FtPinG0007501100.01.T01,FtPinG0003175900.01.T01,FtPinG0006640900.01.T01,FtPinG0003149600.01.T01,FtPinG0002461800.01.T01,FtPinG0006346100.01.T01,FtPinG0008230700.01.T01,
Biological process	signal transduction	GO:0007165	5	0.0462426	1.18726	87	1817	500	12398	FtPinG0008435500.01.T01,FtPinG0007990400.01.T01,FtPinG0008141700.01.T01,FtPinG0009633900.01.T01,FtPinG0003092800.01.T01,FtPinG0009572900.01.T01,FtPinG0004870600.01.T01,FtPinG0005751900.01.T01,FtPinG0006100300.01.T01,FtPinG0003706200.01.T01,FtPinG0006092000.01.T01,FtPinG0000035600.01.T01,FtPinG0008245400.01.T01,FtPinG0007946400.01.T01,FtPinG0005946100.01.T01,FtPinG0007754400.01.T01,FtPinG000130200…
Biological process	cellular carbohydrate metabolic process	GO:0044262	5	0.0464182	1.48352	21	351	500	12398	FtPinG0009572900.01.T01,FtPinG0005565800.01.T01,FtPinG0001209500.01.T01,FtPinG0000374400.01.T01,FtPinG0006394700.01.T01,FtPinG0005796700.01.T01,FtPinG0001910200.01.T01,FtPinG0008014900.01.T01,FtPinG0001083800.01.T01,FtPinG0006867700.01.T01,FtPinG0008844900.01.T01,FtPinG0008957600.01.T01,FtPinG0001478700.01.T01,FtPinG0007461700.01.T01,FtPinG0000391000.01.T01,FtPinG0002370000.01.T01,FtPinG000061590…
Biological process	carbohydrate homeostasis	GO:0033500	6	0.0465163	2.5302	5	49	500	12398	FtPinG0009572900.01.T01,FtPinG0003050700.01.T01,FtPinG0008014900.01.T01,FtPinG0006867700.01.T01,FtPinG0005087800.01.T01,
Biological process	ribonucleoside diphosphate metabolic process	GO:0009185	9	0.0465163	2.5302	5	49	500	12398	FtPinG0009572900.01.T01,FtPinG0002245700.01.T01,FtPinG0001302000.01.T01,FtPinG0006867700.01.T01,FtPinG0008505600.01.T01,
Biological process	cellular response to radiation	GO:0071478	6	0.0467901	1.90738	9	117	500	12398	FtPinG0007946400.01.T01,FtPinG0008662700.01.T01,FtPinG0002714200.01.T01,FtPinG0007575400.01.T01,FtPinG0008014900.01.T01,FtPinG0006431700.01.T01,FtPinG0003111900.01.T01,FtPinG0004759200.01.T01,FtPinG0007162600.01.T01,
Biological process	cellular polysaccharide biosynthetic process	GO:0033692	7	0.0472104	1.77114	11	154	500	12398	FtPinG0005565800.01.T01,FtPinG0000374400.01.T01,FtPinG0006394700.01.T01,FtPinG0001910200.01.T01,FtPinG0007461700.01.T01,FtPinG0000391000.01.T01,FtPinG0002370000.01.T01,FtPinG0000615900.01.T01,FtPinG0005109900.01.T01,FtPinG0000544600.01.T01,FtPinG0005517700.01.T01,
Biological process	response to hexose	GO:0009746	7	0.048702	1.98368	8	100	500	12398	FtPinG0008141700.01.T01,FtPinG0009572900.01.T01,FtPinG0002245700.01.T01,FtPinG0003050700.01.T01,FtPinG0008014900.01.T01,FtPinG0008278400.01.T01,FtPinG0007401700.01.T01,FtPinG0008230700.01.T01,
Biological process	generation of precursor metabolites and energy	GO:0006091	4	0.0489902	1.52852	18	292	500	12398	FtPinG0009572900.01.T01,FtPinG0002245700.01.T01,FtPinG0001302000.01.T01,FtPinG0004635500.01.T01,FtPinG0003141800.01.T01,FtPinG0001910200.01.T01,FtPinG0000345400.01.T01,FtPinG0006867700.01.T01,FtPinG0000592700.01.T01,FtPinG0008505600.01.T01,FtPinG0005721000.01.T01,FtPinG0007461700.01.T01,FtPinG0002370000.01.T01,FtPinG0006431700.01.T01,FtPinG0007768700.01.T01,FtPinG0009391400.01.T01,FtPinG000551770…
Biological process	negative regulation of multicellular organismal process	GO:0051241	5	0.0491838	1.71007	12	174	500	12398	FtPinG0003050700.01.T01,FtPinG0000176500.01.T01,FtPinG0005793100.01.T01,FtPinG0007325700.01.T01,FtPinG0003310400.01.T01,FtPinG0002318100.01.T01,FtPinG0002208200.01.T01,FtPinG0007173800.01.T01,FtPinG0004508000.01.T01,FtPinG0002461800.01.T01,FtPinG0006346100.01.T01,FtPinG0001785400.01.T01,
Biological process	alcohol biosynthetic process	GO:0046165	6	0.0495014	2.25418	6	66	500	12398	FtPinG0007754400.01.T01,FtPinG0007802900.01.T01,FtPinG0000246400.01.T01,FtPinG0003406500.01.T01,FtPinG0001478700.01.T01,FtPinG0008630800.01.T01,
Down-regulated genes
Molecular function	signaling receptor activity	GO:0038023	3	1.35498e-05	2.33008	30	287	481	10722	FtPinG0000230400.01.T01,FtPinG0002964900.01.T01,FtPinG0000935800.01.T01,FtPinG0002025900.01.T01,FtPinG0007216300.01.T01,FtPinG0000169100.01.T01,FtPinG0000748000.01.T01,FtPinG0002064100.01.T01,FtPinG0004414300.01.T01,FtPinG0003085100.01.T01,FtPinG0005526700.01.T01,FtPinG0006651800.01.T01,FtPinG0008049200.01.T01,FtPinG0000778200.01.T01,FtPinG0001691500.01.T01,FtPinG0001045600.01.T01,FtPinG000068890…
Molecular function	molecular transducer activity	GO:0060089	2	1.97998e-05	2.1828	33	337	481	10722	FtPinG0000230400.01.T01,FtPinG0002964900.01.T01,FtPinG0000935800.01.T01,FtPinG0002025900.01.T01,FtPinG0008616100.01.T01,FtPinG0007216300.01.T01,FtPinG0000169100.01.T01,FtPinG0000748000.01.T01,FtPinG0002064100.01.T01,FtPinG0004414300.01.T01,FtPinG0003085100.01.T01,FtPinG0005526700.01.T01,FtPinG0006651800.01.T01,FtPinG0008049200.01.T01,FtPinG0000778200.01.T01,FtPinG0001691500.01.T01,FtPinG000104560…
Molecular function	transmembrane signaling receptor activity	GO:0004888	4	2.35541e-05	2.38833	27	252	481	10722	FtPinG0000230400.01.T01,FtPinG0002964900.01.T01,FtPinG0000935800.01.T01,FtPinG0002025900.01.T01,FtPinG0007216300.01.T01,FtPinG0000169100.01.T01,FtPinG0000748000.01.T01,FtPinG0002064100.01.T01,FtPinG0003085100.01.T01,FtPinG0005526700.01.T01,FtPinG0006651800.01.T01,FtPinG0008049200.01.T01,FtPinG0000778200.01.T01,FtPinG0001691500.01.T01,FtPinG0001045600.01.T01,FtPinG0000688900.01.T01,FtPinG000052480…
Molecular function	transmembrane receptor protein kinase activity	GO:0019199	7	2.93989e-05	2.51167	24	213	481	10722	FtPinG0000230400.01.T01,FtPinG0002964900.01.T01,FtPinG0000935800.01.T01,FtPinG0002025900.01.T01,FtPinG0007216300.01.T01,FtPinG0000169100.01.T01,FtPinG0000748000.01.T01,FtPinG0002064100.01.T01,FtPinG0003085100.01.T01,FtPinG0005526700.01.T01,FtPinG0006651800.01.T01,FtPinG0008049200.01.T01,FtPinG0000778200.01.T01,FtPinG0001691500.01.T01,FtPinG0001045600.01.T01,FtPinG0000688900.01.T01,FtPinG000253630…
Molecular function	ammonium transmembrane transporter activity	GO:0008519	7	0.000108424	9.28794	5	12	481	10722	FtPinG0007590600.01.T01,FtPinG0008073200.01.T01,FtPinG0000899300.01.T01,FtPinG0003608400.01.T01,FtPinG0008696700.01.T01,
Molecular function	transmembrane receptor protein serine/threonine kinase activity	GO:0004675	8	0.000139508	2.3806	22	206	481	10722	FtPinG0000230400.01.T01,FtPinG0002964900.01.T01,FtPinG0000935800.01.T01,FtPinG0002025900.01.T01,FtPinG0007216300.01.T01,FtPinG0000169100.01.T01,FtPinG0000748000.01.T01,FtPinG0002064100.01.T01,FtPinG0006651800.01.T01,FtPinG0008049200.01.T01,FtPinG0000778200.01.T01,FtPinG0001691500.01.T01,FtPinG0001045600.01.T01,FtPinG0000688900.01.T01,FtPinG0002536300.01.T01,FtPinG0008617900.01.T01,FtPinG000470440…
Molecular function	protein domain specific binding	GO:0019904	4	0.0015379	2.85118	11	86	481	10722	FtPinG0003343100.01.T01,FtPinG0003612400.01.T01,FtPinG0006708000.01.T01,FtPinG0009441000.01.T01,FtPinG0006708200.01.T01,FtPinG0009483400.01.T01,FtPinG0009440100.01.T01,FtPinG0000012000.01.T01,FtPinG0002699800.01.T01,FtPinG0002562700.01.T01,FtPinG0007018600.01.T01,
Molecular function	protein serine/threonine kinase activity	GO:0004674	7	0.00406886	1.47582	48	725	481	10722	FtPinG0000230400.01.T01,FtPinG0009537100.01.T01,FtPinG0002964900.01.T01,FtPinG0000935800.01.T01,FtPinG0002025900.01.T01,FtPinG0001299600.01.T01,FtPinG0007216300.01.T01,FtPinG0002733900.01.T01,FtPinG0000169100.01.T01,FtPinG0000748000.01.T01,FtPinG0002064100.01.T01,FtPinG0003085100.01.T01,FtPinG0001577200.01.T01,FtPinG0006651800.01.T01,FtPinG0008049200.01.T01,FtPinG0000778200.01.T01,FtPinG000574320…
Molecular function	oxidoreductase activity, acting on single donors with incorporation of molecular oxygen	GO:0016701	4	0.00535291	4.28674	5	26	481	10722	FtPinG0006479000.01.T01,FtPinG0002952800.01.T01,FtPinG0008408200.01.T01,FtPinG0009495000.01.T01,FtPinG0001471200.01.T01,
Molecular function	nitrate transmembrane transporter activity	GO:0015112	7	0.00535291	4.28674	5	26	481	10722	FtPinG0001054500.01.T01,FtPinG0005129800.01.T01,FtPinG0001049200.01.T01,FtPinG0004740900.01.T01,FtPinG0001049400.01.T01,
Molecular function	monooxygenase activity	GO:0004497	4	0.00535485	2.03804	16	175	481	10722	FtPinG0002979000.01.T01,FtPinG0004697200.01.T01,FtPinG0000614800.01.T01,FtPinG0006479000.01.T01,FtPinG0006434900.01.T01,FtPinG0007664800.01.T01,FtPinG0002387400.01.T01,FtPinG0002677700.01.T01,FtPinG0004449900.01.T01,FtPinG0008892200.01.T01,FtPinG0002376500.01.T01,FtPinG0008324300.01.T01,FtPinG0004309900.01.T01,FtPinG0007162900.01.T01,FtPinG0003080000.01.T01,FtPinG0008670400.01.T01,
Molecular function	protein kinase activity	GO:0004672	6	0.00697559	1.40479	53	841	481	10722	FtPinG0000230400.01.T01,FtPinG0009537100.01.T01,FtPinG0002464900.01.T01,FtPinG0002964900.01.T01,FtPinG0000935800.01.T01,FtPinG0002025900.01.T01,FtPinG0001299600.01.T01,FtPinG0007216300.01.T01,FtPinG0002733900.01.T01,FtPinG0000169100.01.T01,FtPinG0000748000.01.T01,FtPinG0002064100.01.T01,FtPinG0003085100.01.T01,FtPinG0005526700.01.T01,FtPinG0001577200.01.T01,FtPinG0006651800.01.T01,FtPinG000804920…
Molecular function	polysaccharide binding	GO:0030247	4	0.00987426	2.66162	8	67	481	10722	FtPinG0005608000.01.T01,FtPinG0002971600.01.T01,FtPinG0007777800.01.T01,FtPinG0008639900.01.T01,FtPinG0009906500.01.T01,FtPinG0000978400.01.T01,FtPinG0008435400.01.T01,FtPinG0006204400.01.T01,
Molecular function	obsolete pattern binding	GO:0001871	0	0.00987426	2.66162	8	67	481	10722	FtPinG0005608000.01.T01,FtPinG0002971600.01.T01,FtPinG0007777800.01.T01,FtPinG0008639900.01.T01,FtPinG0009906500.01.T01,FtPinG0000978400.01.T01,FtPinG0008435400.01.T01,FtPinG0006204400.01.T01,
Molecular function	serine-type peptidase activity	GO:0008236	5	0.0127067	2.38833	9	84	481	10722	FtPinG0000882400.01.T01,FtPinG0001001800.01.T01,FtPinG0009311400.01.T01,FtPinG0000643900.01.T01,FtPinG0003995800.01.T01,FtPinG0001429000.01.T01,FtPinG0002662200.01.T01,FtPinG0003987100.01.T01,FtPinG0000296100.01.T01,
Molecular function	serine hydrolase activity	GO:0017171	4	0.0127067	2.38833	9	84	481	10722	FtPinG0000882400.01.T01,FtPinG0001001800.01.T01,FtPinG0009311400.01.T01,FtPinG0000643900.01.T01,FtPinG0003995800.01.T01,FtPinG0001429000.01.T01,FtPinG0002662200.01.T01,FtPinG0003987100.01.T01,FtPinG0000296100.01.T01,
Molecular function	phosphotransferase activity, alcohol group as acceptor	GO:0016773	5	0.014232	1.32712	59	991	481	10722	FtPinG0000230400.01.T01,FtPinG0009537100.01.T01,FtPinG0002464900.01.T01,FtPinG0002964900.01.T01,FtPinG0000935800.01.T01,FtPinG0002025900.01.T01,FtPinG0001299600.01.T01,FtPinG0007216300.01.T01,FtPinG0002733900.01.T01,FtPinG0000169100.01.T01,FtPinG0000748000.01.T01,FtPinG0002064100.01.T01,FtPinG0000806900.01.T01,FtPinG0003085100.01.T01,FtPinG0005526700.01.T01,FtPinG0001577200.01.T01,FtPinG000416900…
Molecular function	sulfur compound transmembrane transporter activity	GO:1901682	4	0.0149403	3.37743	5	33	481	10722	FtPinG0007572400.01.T01,FtPinG0006219700.01.T01,FtPinG0001002800.01.T01,FtPinG0006416500.01.T01,FtPinG0003335100.01.T01,
Molecular function	oxidoreductase activity, acting on paired donors, with incorporation or reduction of molecular oxygen, NAD(P)H as one donor, and incorporation of one atom of oxygen	GO:0016709	5	0.0177671	2.06052	11	119	481	10722	FtPinG0006434900.01.T01,FtPinG0007664800.01.T01,FtPinG0002387400.01.T01,FtPinG0002677700.01.T01,FtPinG0004449900.01.T01,FtPinG0008892200.01.T01,FtPinG0008324300.01.T01,FtPinG0004309900.01.T01,FtPinG0007162900.01.T01,FtPinG0003080000.01.T01,FtPinG0008670400.01.T01,
Molecular function	obsolete cofactor binding	GO:0048037	0	0.0204135	1.72249	17	220	481	10722	FtPinG0003343100.01.T01,FtPinG0001258700.01.T01,FtPinG0000614800.01.T01,FtPinG0002326800.01.T01,FtPinG0004792800.01.T01,FtPinG0002326900.01.T01,FtPinG0003075800.01.T01,FtPinG0005493100.01.T01,FtPinG0000012000.01.T01,FtPinG0003826700.01.T01,FtPinG0003106800.01.T01,FtPinG0004698500.01.T01,FtPinG0001388600.01.T01,FtPinG0006340900.01.T01,FtPinG0008617900.01.T01,FtPinG0002390000.01.T01,FtPinG000422420…
Molecular function	oxidoreductase activity	GO:0016491	3	0.0227043	1.30844	55	937	481	10722	FtPinG0001701800.01.T01,FtPinG0001421900.01.T01,FtPinG0005126800.01.T01,FtPinG0002979000.01.T01,FtPinG0004697200.01.T01,FtPinG0002810000.01.T01,FtPinG0001186100.01.T01,FtPinG0002371500.01.T01,FtPinG0000614800.01.T01,FtPinG0006479000.01.T01,FtPinG0004792800.01.T01,FtPinG0006708000.01.T01,FtPinG0006434900.01.T01,FtPinG0002952800.01.T01,FtPinG0008408200.01.T01,FtPinG0007664800.01.T01,FtPinG000670820…
Molecular function	amide transmembrane transporter activity	GO:0042887	4	0.0235921	2.67493	6	50	481	10722	FtPinG0000656100.01.T01,FtPinG0007475700.01.T01,FtPinG0005720300.01.T01,FtPinG0000899300.01.T01,FtPinG0006397800.01.T01,FtPinG0006800100.01.T01,
Molecular function	endopeptidase activity	GO:0004175	5	0.0242176	1.84576	13	157	481	10722	FtPinG0000882400.01.T01,FtPinG0003042200.01.T01,FtPinG0003405200.01.T01,FtPinG0003995800.01.T01,FtPinG0002315100.01.T01,FtPinG0001224600.01.T01,FtPinG0001429000.01.T01,FtPinG0005410400.01.T01,FtPinG0003106600.01.T01,FtPinG0001879900.01.T01,FtPinG0002662200.01.T01,FtPinG0003405600.01.T01,FtPinG0000296100.01.T01,
Molecular function	oxidoreductase activity, acting on metal ions	GO:0016722	4	0.0263414	2.93303	5	38	481	10722	FtPinG0005126800.01.T01,FtPinG0001976400.01.T01,FtPinG0008390000.01.T01,FtPinG0003855800.01.T01,FtPinG0006531100.01.T01,
Molecular function	glycosyltransferase activity	GO:0016757	4	0.0265804	1.49373	26	388	481	10722	FtPinG0000386600.01.T01,FtPinG0007470100.01.T01,FtPinG0004911400.01.T01,FtPinG0009670100.01.T01,FtPinG0002543800.01.T01,FtPinG0009636500.01.T01,FtPinG0005606600.01.T01,FtPinG0003555100.01.T01,FtPinG0006247400.01.T01,FtPinG0002170900.01.T01,FtPinG0007810900.01.T01,FtPinG0006413200.01.T01,FtPinG0001874200.01.T01,FtPinG0006166100.01.T01,FtPinG0000034500.01.T01,FtPinG0004681300.01.T01,FtPinG000498340…
Molecular function	glucosyltransferase activity	GO:0046527	6	0.0290961	1.68234	16	212	481	10722	FtPinG0000386600.01.T01,FtPinG0007470100.01.T01,FtPinG0009670100.01.T01,FtPinG0002543800.01.T01,FtPinG0009636500.01.T01,FtPinG0006247400.01.T01,FtPinG0002170900.01.T01,FtPinG0007810900.01.T01,FtPinG0001874200.01.T01,FtPinG0006166100.01.T01,FtPinG0003140900.01.T01,FtPinG0008157100.01.T01,FtPinG0007770500.01.T01,FtPinG0008935100.01.T01,FtPinG0002695200.01.T01,FtPinG0005526900.01.T01,
Molecular function	DNA-binding transcription factor activity	GO:0003700	3	0.0329191	1.24039	69	1240	481	10722	FtPinG0002490200.01.T01,FtPinG0001221400.01.T01,FtPinG0002664400.01.T01,FtPinG0001368400.01.T01,FtPinG0002336500.01.T01,FtPinG0009285400.01.T01,FtPinG0000683600.01.T01,FtPinG0004829100.01.T01,FtPinG0008616100.01.T01,FtPinG0002508600.01.T01,FtPinG0003380800.01.T01,FtPinG0005612400.01.T01,FtPinG0006546100.01.T01,FtPinG0008557700.01.T01,FtPinG0002062300.01.T01,FtPinG0000894900.01.T01,FtPinG000246410…
Molecular function	kinase activity	GO:0016301	5	0.0340116	1.26459	59	1040	481	10722	FtPinG0000230400.01.T01,FtPinG0009537100.01.T01,FtPinG0002464900.01.T01,FtPinG0002964900.01.T01,FtPinG0000935800.01.T01,FtPinG0002025900.01.T01,FtPinG0001299600.01.T01,FtPinG0007216300.01.T01,FtPinG0002733900.01.T01,FtPinG0000169100.01.T01,FtPinG0000748000.01.T01,FtPinG0002064100.01.T01,FtPinG0000806900.01.T01,FtPinG0003085100.01.T01,FtPinG0005526700.01.T01,FtPinG0001577200.01.T01,FtPinG000416900…
Molecular function	tetrapyrrole binding	GO:0046906	4	0.0352823	2.71842	5	41	481	10722	FtPinG0003343100.01.T01,FtPinG0000614800.01.T01,FtPinG0002326800.01.T01,FtPinG0002326900.01.T01,FtPinG0004698500.01.T01,
Molecular function	peptidase activity	GO:0008233	4	0.0360074	1.54263	20	289	481	10722	FtPinG0000882400.01.T01,FtPinG0001001800.01.T01,FtPinG0009311400.01.T01,FtPinG0000643900.01.T01,FtPinG0003042200.01.T01,FtPinG0003405200.01.T01,FtPinG0003995800.01.T01,FtPinG0004534500.01.T01,FtPinG0002315100.01.T01,FtPinG0001224600.01.T01,FtPinG0001429000.01.T01,FtPinG0005410400.01.T01,FtPinG0003106600.01.T01,FtPinG0001879900.01.T01,FtPinG0002662200.01.T01,FtPinG0002149600.01.T01,FtPinG000340560…
Molecular function	serine-type endopeptidase activity	GO:0004252	6	0.038631	2.6537	5	42	481	10722	FtPinG0000882400.01.T01,FtPinG0003995800.01.T01,FtPinG0001429000.01.T01,FtPinG0002662200.01.T01,FtPinG0000296100.01.T01,
Molecular function	hexosyltransferase activity	GO:0016758	5	0.0497292	1.4552	22	337	481	10722	FtPinG0000386600.01.T01,FtPinG0007470100.01.T01,FtPinG0004911400.01.T01,FtPinG0009670100.01.T01,FtPinG0002543800.01.T01,FtPinG0009636500.01.T01,FtPinG0003555100.01.T01,FtPinG0006247400.01.T01,FtPinG0002170900.01.T01,FtPinG0007810900.01.T01,FtPinG0001874200.01.T01,FtPinG0006166100.01.T01,FtPinG0000034500.01.T01,FtPinG0004681300.01.T01,FtPinG0003140900.01.T01,FtPinG0006340900.01.T01,FtPinG000815710…
Molecular function	oxidoreductase activity, acting on the aldehyde or oxo group of donors, NAD or NADP as acceptor	GO:0016620	5	0.0498074	2.47678	5	45	481	10722	FtPinG0001701800.01.T01,FtPinG0000754400.01.T01,FtPinG0003106800.01.T01,FtPinG0000987900.01.T01,FtPinG0000762500.01.T01,
Cellular component	cell periphery	GO:0071944	3	1.25087e-08	1.38871	213	3467	553	12500	FtPinG0000230400.01.T01,FtPinG0005348000.01.T01,FtPinG0001479500.01.T01,FtPinG0005489400.01.T01,FtPinG0005977600.01.T01,FtPinG0005845700.01.T01,FtPinG0000570100.01.T01,FtPinG0001421900.01.T01,FtPinG0009537100.01.T01,FtPinG0002464900.01.T01,FtPinG0006254200.01.T01,FtPinG0008141200.01.T01,FtPinG0002964900.01.T01,FtPinG0000748300.01.T01,FtPinG0001447100.01.T01,FtPinG0000656100.01.T01,FtPinG000565960…
Cellular component	plasma membrane	GO:0005886	4	2.24428e-07	1.39866	180	2909	553	12500	FtPinG0000230400.01.T01,FtPinG0005348000.01.T01,FtPinG0001479500.01.T01,FtPinG0005489400.01.T01,FtPinG0005977600.01.T01,FtPinG0005845700.01.T01,FtPinG0000570100.01.T01,FtPinG0001421900.01.T01,FtPinG0009537100.01.T01,FtPinG0006254200.01.T01,FtPinG0002964900.01.T01,FtPinG0000748300.01.T01,FtPinG0001447100.01.T01,FtPinG0000656100.01.T01,FtPinG0005659600.01.T01,FtPinG0005478300.01.T01,FtPinG000109700…
Cellular component	membrane	GO:0016020	3	1.1338e-05	1.22221	267	4938	553	12500	FtPinG0000230400.01.T01,FtPinG0005348000.01.T01,FtPinG0003343100.01.T01,FtPinG0001479500.01.T01,FtPinG0002173900.01.T01,FtPinG0006445700.01.T01,FtPinG0005489400.01.T01,FtPinG0005977600.01.T01,FtPinG0005845700.01.T01,FtPinG0000570100.01.T01,FtPinG0001421900.01.T01,FtPinG0009537100.01.T01,FtPinG0006254200.01.T01,FtPinG0002964900.01.T01,FtPinG0000748300.01.T01,FtPinG0001447100.01.T01,FtPinG000065610…
Cellular component	chloroplast thylakoid	GO:0009534	6	1.306e-05	2.23333	33	334	553	12500	FtPinG0003343100.01.T01,FtPinG0002501300.01.T01,FtPinG0002178800.01.T01,FtPinG0008049400.01.T01,FtPinG0003612400.01.T01,FtPinG0001186100.01.T01,FtPinG0002163500.01.T01,FtPinG0002326800.01.T01,FtPinG0008706600.01.T01,FtPinG0004792800.01.T01,FtPinG0006708000.01.T01,FtPinG0009441000.01.T01,FtPinG0002952800.01.T01,FtPinG0006708200.01.T01,FtPinG0004740200.01.T01,FtPinG0003380100.01.T01,FtPinG000973900…
Cellular component	plastid thylakoid	GO:0031976	5	1.67112e-05	2.2069	33	338	553	12500	FtPinG0003343100.01.T01,FtPinG0002501300.01.T01,FtPinG0002178800.01.T01,FtPinG0008049400.01.T01,FtPinG0003612400.01.T01,FtPinG0001186100.01.T01,FtPinG0002163500.01.T01,FtPinG0002326800.01.T01,FtPinG0008706600.01.T01,FtPinG0004792800.01.T01,FtPinG0006708000.01.T01,FtPinG0009441000.01.T01,FtPinG0002952800.01.T01,FtPinG0006708200.01.T01,FtPinG0004740200.01.T01,FtPinG0003380100.01.T01,FtPinG000973900…
Cellular component	plastid thylakoid membrane	GO:0055035	6	1.74519e-05	2.38834	28	265	553	12500	FtPinG0003343100.01.T01,FtPinG0002501300.01.T01,FtPinG0002178800.01.T01,FtPinG0008049400.01.T01,FtPinG0003612400.01.T01,FtPinG0001186100.01.T01,FtPinG0002163500.01.T01,FtPinG0002326800.01.T01,FtPinG0008706600.01.T01,FtPinG0004792800.01.T01,FtPinG0006708000.01.T01,FtPinG0009441000.01.T01,FtPinG0006708200.01.T01,FtPinG0004740200.01.T01,FtPinG0003380100.01.T01,FtPinG0002326900.01.T01,FtPinG000317340…
Cellular component	intrinsic component of plasma membrane	GO:0031226	4	3.5311e-05	2.00222	38	429	553	12500	FtPinG0005489400.01.T01,FtPinG0005977600.01.T01,FtPinG0000656100.01.T01,FtPinG0000263500.01.T01,FtPinG0001509500.01.T01,FtPinG0007475700.01.T01,FtPinG0002692300.01.T01,FtPinG0005608000.01.T01,FtPinG0007572400.01.T01,FtPinG0001689700.01.T01,FtPinG0003471500.01.T01,FtPinG0003424700.01.T01,FtPinG0005811200.01.T01,FtPinG0007590600.01.T01,FtPinG0004004500.01.T01,FtPinG0004531000.01.T01,FtPinG000100280…
Cellular component	thylakoid membrane	GO:0042651	5	4.17806e-05	2.27666	28	278	553	12500	FtPinG0003343100.01.T01,FtPinG0002501300.01.T01,FtPinG0002178800.01.T01,FtPinG0008049400.01.T01,FtPinG0003612400.01.T01,FtPinG0001186100.01.T01,FtPinG0002163500.01.T01,FtPinG0002326800.01.T01,FtPinG0008706600.01.T01,FtPinG0004792800.01.T01,FtPinG0006708000.01.T01,FtPinG0009441000.01.T01,FtPinG0006708200.01.T01,FtPinG0004740200.01.T01,FtPinG0003380100.01.T01,FtPinG0002326900.01.T01,FtPinG000317340…
Cellular component	photosynthetic membrane	GO:0034357	4	4.45538e-05	2.2685	28	279	553	12500	FtPinG0003343100.01.T01,FtPinG0002501300.01.T01,FtPinG0002178800.01.T01,FtPinG0008049400.01.T01,FtPinG0003612400.01.T01,FtPinG0001186100.01.T01,FtPinG0002163500.01.T01,FtPinG0002326800.01.T01,FtPinG0008706600.01.T01,FtPinG0004792800.01.T01,FtPinG0006708000.01.T01,FtPinG0009441000.01.T01,FtPinG0006708200.01.T01,FtPinG0004740200.01.T01,FtPinG0003380100.01.T01,FtPinG0002326900.01.T01,FtPinG000317340…
Cellular component	plastoglobule	GO:0010287	3	5.06779e-05	3.87497	12	70	553	12500	FtPinG0003343100.01.T01,FtPinG0003612400.01.T01,FtPinG0002326800.01.T01,FtPinG0004792800.01.T01,FtPinG0009441000.01.T01,FtPinG0002971600.01.T01,FtPinG0004740200.01.T01,FtPinG0009739000.01.T01,FtPinG0002326900.01.T01,FtPinG0009440100.01.T01,FtPinG0004698500.01.T01,FtPinG0002376500.01.T01,
Cellular component	chloroplast thylakoid membrane	GO:0009535	7	7.73597e-05	2.27792	26	258	553	12500	FtPinG0003343100.01.T01,FtPinG0002501300.01.T01,FtPinG0002178800.01.T01,FtPinG0008049400.01.T01,FtPinG0003612400.01.T01,FtPinG0001186100.01.T01,FtPinG0002163500.01.T01,FtPinG0002326800.01.T01,FtPinG0008706600.01.T01,FtPinG0004792800.01.T01,FtPinG0009441000.01.T01,FtPinG0004740200.01.T01,FtPinG0003380100.01.T01,FtPinG0002326900.01.T01,FtPinG0003173400.01.T01,FtPinG0002701100.01.T01,FtPinG000949500…
Cellular component	obsolete plasma membrane part	GO:0044459	0	0.000116722	1.81	43	537	553	12500	FtPinG0005489400.01.T01,FtPinG0005977600.01.T01,FtPinG0000656100.01.T01,FtPinG0005478300.01.T01,FtPinG0000263500.01.T01,FtPinG0001509500.01.T01,FtPinG0007475700.01.T01,FtPinG0002692300.01.T01,FtPinG0005608000.01.T01,FtPinG0007572400.01.T01,FtPinG0001689700.01.T01,FtPinG0003471500.01.T01,FtPinG0003424700.01.T01,FtPinG0005811200.01.T01,FtPinG0007590600.01.T01,FtPinG0004004500.01.T01,FtPinG000453100…
Cellular component	obsolete thylakoid part	GO:0044436	0	0.000125321	2.13821	28	296	553	12500	FtPinG0003343100.01.T01,FtPinG0002501300.01.T01,FtPinG0002178800.01.T01,FtPinG0008049400.01.T01,FtPinG0003612400.01.T01,FtPinG0001186100.01.T01,FtPinG0002163500.01.T01,FtPinG0002326800.01.T01,FtPinG0008706600.01.T01,FtPinG0004792800.01.T01,FtPinG0006708000.01.T01,FtPinG0009441000.01.T01,FtPinG0006708200.01.T01,FtPinG0004740200.01.T01,FtPinG0003380100.01.T01,FtPinG0002326900.01.T01,FtPinG000317340…
Cellular component	plastid membrane	GO:0042170	5	0.000130192	1.96556	34	391	553	12500	FtPinG0003343100.01.T01,FtPinG0002501300.01.T01,FtPinG0002178800.01.T01,FtPinG0008049400.01.T01,FtPinG0003612400.01.T01,FtPinG0001186100.01.T01,FtPinG0006990700.01.T01,FtPinG0002163500.01.T01,FtPinG0002326800.01.T01,FtPinG0008706600.01.T01,FtPinG0004792800.01.T01,FtPinG0006708000.01.T01,FtPinG0009441000.01.T01,FtPinG0006738500.01.T01,FtPinG0006708200.01.T01,FtPinG0004740200.01.T01,FtPinG000338010…
Cellular component	extracellular region	GO:0005576	3	0.000205648	1.80832	40	500	553	12500	FtPinG0001479500.01.T01,FtPinG0008141200.01.T01,FtPinG0002727000.01.T01,FtPinG0002178800.01.T01,FtPinG0001978800.01.T01,FtPinG0000263500.01.T01,FtPinG0002810000.01.T01,FtPinG0008266700.01.T01,FtPinG0003042200.01.T01,FtPinG0009230600.01.T01,FtPinG0009349100.01.T01,FtPinG0009670100.01.T01,FtPinG0002543800.01.T01,FtPinG0003405200.01.T01,FtPinG0002971600.01.T01,FtPinG0006219700.01.T01,FtPinG000354000…
Cellular component	thylakoid	GO:0009579	4	0.000715172	1.81051	33	412	553	12500	FtPinG0003343100.01.T01,FtPinG0002501300.01.T01,FtPinG0002178800.01.T01,FtPinG0008049400.01.T01,FtPinG0003612400.01.T01,FtPinG0001186100.01.T01,FtPinG0002163500.01.T01,FtPinG0002326800.01.T01,FtPinG0008706600.01.T01,FtPinG0004792800.01.T01,FtPinG0006708000.01.T01,FtPinG0009441000.01.T01,FtPinG0002952800.01.T01,FtPinG0006708200.01.T01,FtPinG0004740200.01.T01,FtPinG0003380100.01.T01,FtPinG000973900…
Cellular component	apoplast	GO:0048046	4	0.00219414	1.88366	24	288	553	12500	FtPinG0008141200.01.T01,FtPinG0000263500.01.T01,FtPinG0002810000.01.T01,FtPinG0008266700.01.T01,FtPinG0009349100.01.T01,FtPinG0003405200.01.T01,FtPinG0002971600.01.T01,FtPinG0006219700.01.T01,FtPinG0009739000.01.T01,FtPinG0006416500.01.T01,FtPinG0001708700.01.T01,FtPinG0009483400.01.T01,FtPinG0002068500.01.T01,FtPinG0009443700.01.T01,FtPinG0004261700.01.T01,FtPinG0007444900.01.T01,FtPinG000862760…
Cellular component	anchored component of plasma membrane	GO:0046658	5	0.00259113	2.34412	14	135	553	12500	FtPinG0005977600.01.T01,FtPinG0000263500.01.T01,FtPinG0001509500.01.T01,FtPinG0005608000.01.T01,FtPinG0003471500.01.T01,FtPinG0004004500.01.T01,FtPinG0007777800.01.T01,FtPinG0008639900.01.T01,FtPinG0001607500.01.T01,FtPinG0000515900.01.T01,FtPinG0000317900.01.T01,FtPinG0000978400.01.T01,FtPinG0008435400.01.T01,FtPinG0006204400.01.T01,
Cellular component	integral component of plasma membrane	GO:0005887	5	0.00274719	1.85152	24	293	553	12500	FtPinG0005489400.01.T01,FtPinG0000656100.01.T01,FtPinG0007475700.01.T01,FtPinG0002692300.01.T01,FtPinG0007572400.01.T01,FtPinG0001689700.01.T01,FtPinG0003424700.01.T01,FtPinG0005811200.01.T01,FtPinG0007590600.01.T01,FtPinG0004531000.01.T01,FtPinG0001002800.01.T01,FtPinG0002170900.01.T01,FtPinG0006548000.01.T01,FtPinG0008563300.01.T01,FtPinG0005720300.01.T01,FtPinG0007036800.01.T01,FtPinG000807320…
Cellular component	plant-type cell wall	GO:0009505	5	0.00345026	1.77019	26	332	553	12500	FtPinG0005977600.01.T01,FtPinG0000263500.01.T01,FtPinG0002810000.01.T01,FtPinG0002939000.01.T01,FtPinG0003471500.01.T01,FtPinG0006546900.01.T01,FtPinG0000077600.01.T01,FtPinG0009205900.01.T01,FtPinG0007023700.01.T01,FtPinG0007126900.01.T01,FtPinG0009459200.01.T01,FtPinG0009443700.01.T01,FtPinG0004261700.01.T01,FtPinG0004087700.01.T01,FtPinG0000873500.01.T01,FtPinG0002662200.01.T01,FtPinG000436170…
Cellular component	anchored component of membrane	GO:0031225	4	0.00593597	2.13821	14	148	553	12500	FtPinG0005977600.01.T01,FtPinG0000263500.01.T01,FtPinG0001509500.01.T01,FtPinG0005608000.01.T01,FtPinG0003471500.01.T01,FtPinG0004004500.01.T01,FtPinG0007777800.01.T01,FtPinG0008639900.01.T01,FtPinG0001607500.01.T01,FtPinG0000515900.01.T01,FtPinG0000317900.01.T01,FtPinG0000978400.01.T01,FtPinG0008435400.01.T01,FtPinG0006204400.01.T01,
Cellular component	plastid envelope	GO:0009526	5	0.00844143	1.42794	47	744	553	12500	FtPinG0003343100.01.T01,FtPinG0008116600.01.T01,FtPinG0002501300.01.T01,FtPinG0002178800.01.T01,FtPinG0008049400.01.T01,FtPinG0003612400.01.T01,FtPinG0001186100.01.T01,FtPinG0006990700.01.T01,FtPinG0002163500.01.T01,FtPinG0001689700.01.T01,FtPinG0002326800.01.T01,FtPinG0008706600.01.T01,FtPinG0004792800.01.T01,FtPinG0006708000.01.T01,FtPinG0009441000.01.T01,FtPinG0006738500.01.T01,FtPinG000297160…
Cellular component	cell wall	GO:0005618	4	0.0121482	1.42309	43	683	553	12500	FtPinG0001479500.01.T01,FtPinG0005977600.01.T01,FtPinG0001421900.01.T01,FtPinG0008141200.01.T01,FtPinG0000263500.01.T01,FtPinG0002810000.01.T01,FtPinG0008266700.01.T01,FtPinG0006790900.01.T01,FtPinG0002939000.01.T01,FtPinG0003042200.01.T01,FtPinG0005196500.01.T01,FtPinG0003471500.01.T01,FtPinG0006546900.01.T01,FtPinG0007953800.01.T01,FtPinG0000077600.01.T01,FtPinG0009205900.01.T01,FtPinG000510030…
Cellular component	external encapsulating structure	GO:0030312	3	0.0152866	1.40256	43	693	553	12500	FtPinG0001479500.01.T01,FtPinG0005977600.01.T01,FtPinG0001421900.01.T01,FtPinG0008141200.01.T01,FtPinG0000263500.01.T01,FtPinG0002810000.01.T01,FtPinG0008266700.01.T01,FtPinG0006790900.01.T01,FtPinG0002939000.01.T01,FtPinG0003042200.01.T01,FtPinG0005196500.01.T01,FtPinG0003471500.01.T01,FtPinG0006546900.01.T01,FtPinG0007953800.01.T01,FtPinG0000077600.01.T01,FtPinG0009205900.01.T01,FtPinG000510030…
Cellular component	organelle subcompartment	GO:0031984	3	0.0188454	1.30325	61	1058	553	12500	FtPinG0003343100.01.T01,FtPinG0002173900.01.T01,FtPinG0002967200.01.T01,FtPinG0002501300.01.T01,FtPinG0005187800.01.T01,FtPinG0002178800.01.T01,FtPinG0008049400.01.T01,FtPinG0003612400.01.T01,FtPinG0001186100.01.T01,FtPinG0002371500.01.T01,FtPinG0002163500.01.T01,FtPinG0004911400.01.T01,FtPinG0002326800.01.T01,FtPinG0007033200.01.T01,FtPinG0008706600.01.T01,FtPinG0006921100.01.T01,FtPinG000479280…
Cellular component	obsolete chloroplast part	GO:0044434	0	0.0397834	1.24684	62	1124	553	12500	FtPinG0003343100.01.T01,FtPinG0008116600.01.T01,FtPinG0002501300.01.T01,FtPinG0002178800.01.T01,FtPinG0008049400.01.T01,FtPinG0003612400.01.T01,FtPinG0001186100.01.T01,FtPinG0000418000.01.T01,FtPinG0006990700.01.T01,FtPinG0002163500.01.T01,FtPinG0001689700.01.T01,FtPinG0007470100.01.T01,FtPinG0000570600.01.T01,FtPinG0002326800.01.T01,FtPinG0008706600.01.T01,FtPinG0004792800.01.T01,FtPinG000670800…
Cellular component	obsolete plastid part	GO:0044435	0	0.0450882	1.23508	63	1153	553	12500	FtPinG0003343100.01.T01,FtPinG0008116600.01.T01,FtPinG0002501300.01.T01,FtPinG0002178800.01.T01,FtPinG0008049400.01.T01,FtPinG0003612400.01.T01,FtPinG0001186100.01.T01,FtPinG0000418000.01.T01,FtPinG0006990700.01.T01,FtPinG0002163500.01.T01,FtPinG0001689700.01.T01,FtPinG0007470100.01.T01,FtPinG0000570600.01.T01,FtPinG0002326800.01.T01,FtPinG0008706600.01.T01,FtPinG0004792800.01.T01,FtPinG000670800…
Biological process	plant-type cell wall biogenesis	GO:0009832	6	1.7061e-05	2.81883	21	172	537	12398	FtPinG0005977600.01.T01,FtPinG0000570100.01.T01,FtPinG0006586600.01.T01,FtPinG0000386600.01.T01,FtPinG0001968600.01.T01,FtPinG0009540300.01.T01,FtPinG0006190400.01.T01,FtPinG0009670100.01.T01,FtPinG0002543800.01.T01,FtPinG0009636500.01.T01,FtPinG0003555100.01.T01,FtPinG0007089300.01.T01,FtPinG0006247400.01.T01,FtPinG0002170900.01.T01,FtPinG0006548000.01.T01,FtPinG0001874200.01.T01,FtPinG000150680…
Biological process	cell wall biogenesis	GO:0042546	5	2.93301e-05	2.51864	24	220	537	12398	FtPinG0005977600.01.T01,FtPinG0000570100.01.T01,FtPinG0006586600.01.T01,FtPinG0000386600.01.T01,FtPinG0001968600.01.T01,FtPinG0009540300.01.T01,FtPinG0006190400.01.T01,FtPinG0009670100.01.T01,FtPinG0002543800.01.T01,FtPinG0009636500.01.T01,FtPinG0005606600.01.T01,FtPinG0003555100.01.T01,FtPinG0007089300.01.T01,FtPinG0006247400.01.T01,FtPinG0002170900.01.T01,FtPinG0006548000.01.T01,FtPinG000187420…
Biological process	plant-type cell wall organization or biogenesis	GO:0071669	4	8.22666e-05	2.19136	28	295	537	12398	FtPinG0005977600.01.T01,FtPinG0000570100.01.T01,FtPinG0006586600.01.T01,FtPinG0000386600.01.T01,FtPinG0001968600.01.T01,FtPinG0003471500.01.T01,FtPinG0009540300.01.T01,FtPinG0006190400.01.T01,FtPinG0009670100.01.T01,FtPinG0002543800.01.T01,FtPinG0009636500.01.T01,FtPinG0003085100.01.T01,FtPinG0003555100.01.T01,FtPinG0007089300.01.T01,FtPinG0006247400.01.T01,FtPinG0002170900.01.T01,FtPinG000654800…
Biological process	one-carbon compound transport	GO:0019755	6	0.000107465	7.2908	6	19	537	12398	FtPinG0007590600.01.T01,FtPinG0004531000.01.T01,FtPinG0005720300.01.T01,FtPinG0008073200.01.T01,FtPinG0000899300.01.T01,FtPinG0003608400.01.T01,
Biological process	ammonium transmembrane transport	GO:0072488	9	0.000144152	8.87982	5	13	537	12398	FtPinG0007590600.01.T01,FtPinG0008073200.01.T01,FtPinG0000899300.01.T01,FtPinG0003608400.01.T01,FtPinG0008696700.01.T01,
Biological process	transmembrane receptor protein serine/threonine kinase signaling pathway	GO:0007178	8	0.000239425	2.29831	22	221	537	12398	FtPinG0000230400.01.T01,FtPinG0002964900.01.T01,FtPinG0000935800.01.T01,FtPinG0002025900.01.T01,FtPinG0007216300.01.T01,FtPinG0000169100.01.T01,FtPinG0000748000.01.T01,FtPinG0002064100.01.T01,FtPinG0006651800.01.T01,FtPinG0008049200.01.T01,FtPinG0000778200.01.T01,FtPinG0001691500.01.T01,FtPinG0001045600.01.T01,FtPinG0000688900.01.T01,FtPinG0002536300.01.T01,FtPinG0008617900.01.T01,FtPinG000470440…
Biological process	cell wall organization or biogenesis	GO:0071554	3	0.000271536	1.83313	37	466	537	12398	FtPinG0005977600.01.T01,FtPinG0000570100.01.T01,FtPinG0006586600.01.T01,FtPinG0000386600.01.T01,FtPinG0003645700.01.T01,FtPinG0001968600.01.T01,FtPinG0003471500.01.T01,FtPinG0009540300.01.T01,FtPinG0006190400.01.T01,FtPinG0007249400.01.T01,FtPinG0009670100.01.T01,FtPinG0002543800.01.T01,FtPinG0009636500.01.T01,FtPinG0003085100.01.T01,FtPinG0005606600.01.T01,FtPinG0003555100.01.T01,FtPinG000708930…
Biological process	enzyme linked receptor protein signaling pathway	GO:0007167	7	0.000322563	2.20337	23	241	537	12398	FtPinG0000230400.01.T01,FtPinG0002964900.01.T01,FtPinG0002178800.01.T01,FtPinG0000935800.01.T01,FtPinG0002025900.01.T01,FtPinG0007216300.01.T01,FtPinG0000169100.01.T01,FtPinG0000748000.01.T01,FtPinG0002064100.01.T01,FtPinG0006651800.01.T01,FtPinG0008049200.01.T01,FtPinG0000778200.01.T01,FtPinG0001691500.01.T01,FtPinG0001045600.01.T01,FtPinG0000688900.01.T01,FtPinG0002536300.01.T01,FtPinG000861790…
Biological process	cell surface receptor signaling pathway	GO:0007166	6	0.000466187	2.00438	27	311	537	12398	FtPinG0000230400.01.T01,FtPinG0005348000.01.T01,FtPinG0002964900.01.T01,FtPinG0002178800.01.T01,FtPinG0000935800.01.T01,FtPinG0002025900.01.T01,FtPinG0001299600.01.T01,FtPinG0007216300.01.T01,FtPinG0000169100.01.T01,FtPinG0000748000.01.T01,FtPinG0002064100.01.T01,FtPinG0006651800.01.T01,FtPinG0008049200.01.T01,FtPinG0000778200.01.T01,FtPinG0001691500.01.T01,FtPinG0001045600.01.T01,FtPinG000068890…
Biological process	organic cation transport	GO:0015695	7	0.000599984	6.79045	5	17	537	12398	FtPinG0007590600.01.T01,FtPinG0008073200.01.T01,FtPinG0000899300.01.T01,FtPinG0003608400.01.T01,FtPinG0008696700.01.T01,
Biological process	response to light stimulus	GO:0009416	5	0.000687234	1.56231	54	798	537	12398	FtPinG0003343100.01.T01,FtPinG0003249200.01.T01,FtPinG0002664900.01.T01,FtPinG0002178800.01.T01,FtPinG0004168100.01.T01,FtPinG0004676200.01.T01,FtPinG0003380800.01.T01,FtPinG0001442400.01.T01,FtPinG0008557700.01.T01,FtPinG0001786900.01.T01,FtPinG0000614800.01.T01,FtPinG0009349100.01.T01,FtPinG0005173600.01.T01,FtPinG0003375700.01.T01,FtPinG0002326800.01.T01,FtPinG0009236200.01.T01,FtPinG000083600…
Biological process	cellular response to nitrogen levels	GO:0043562	7	0.000912066	4.36791	7	37	537	12398	FtPinG0001049200.01.T01,FtPinG0004485800.01.T01,FtPinG0008184600.01.T01,FtPinG0008891900.01.T01,FtPinG0000899300.01.T01,FtPinG0006046800.01.T01,FtPinG0001049400.01.T01,
Biological process	response to auxin	GO:0009733	6	0.00177285	1.69908	34	462	537	12398	FtPinG0000533700.01.T01,FtPinG0002664900.01.T01,FtPinG0000683600.01.T01,FtPinG0002415700.01.T01,FtPinG0002692300.01.T01,FtPinG0002508600.01.T01,FtPinG0005811200.01.T01,FtPinG0005348800.01.T01,FtPinG0004414300.01.T01,FtPinG0003995800.01.T01,FtPinG0006568700.01.T01,FtPinG0005737100.01.T01,FtPinG0005142100.01.T01,FtPinG0006548000.01.T01,FtPinG0001726900.01.T01,FtPinG0008442000.01.T01,FtPinG000249220…
Biological process	steroid biosynthetic process	GO:0006694	6	0.00184167	3.19673	9	65	537	12398	FtPinG0000570100.01.T01,FtPinG0001447100.01.T01,FtPinG0001968600.01.T01,FtPinG0000614800.01.T01,FtPinG0002387400.01.T01,FtPinG0004449900.01.T01,FtPinG0008892200.01.T01,FtPinG0004309900.01.T01,FtPinG0003229300.01.T01,
Biological process	seed coat development	GO:0010214	4	0.00210801	3.42037	8	54	537	12398	FtPinG0002490200.01.T01,FtPinG0001221400.01.T01,FtPinG0009547700.01.T01,FtPinG0004261700.01.T01,FtPinG0002662200.01.T01,FtPinG0005326500.01.T01,FtPinG0004174400.01.T01,FtPinG0008435400.01.T01,
Biological process	cellular carbohydrate biosynthetic process	GO:0034637	6	0.00235951	2.15653	17	182	537	12398	FtPinG0001479500.01.T01,FtPinG0006586600.01.T01,FtPinG0000386600.01.T01,FtPinG0007470100.01.T01,FtPinG0009670100.01.T01,FtPinG0002543800.01.T01,FtPinG0009636500.01.T01,FtPinG0003555100.01.T01,FtPinG0006247400.01.T01,FtPinG0002170900.01.T01,FtPinG0001874200.01.T01,FtPinG0000034500.01.T01,FtPinG0004681300.01.T01,FtPinG0009906500.01.T01,FtPinG0004924000.01.T01,FtPinG0002695200.01.T01,FtPinG000630230…
Biological process	response to radiation	GO:0009314	4	0.00241197	1.47716	54	844	537	12398	FtPinG0003343100.01.T01,FtPinG0003249200.01.T01,FtPinG0002664900.01.T01,FtPinG0002178800.01.T01,FtPinG0004168100.01.T01,FtPinG0004676200.01.T01,FtPinG0003380800.01.T01,FtPinG0001442400.01.T01,FtPinG0008557700.01.T01,FtPinG0001786900.01.T01,FtPinG0000614800.01.T01,FtPinG0009349100.01.T01,FtPinG0005173600.01.T01,FtPinG0003375700.01.T01,FtPinG0002326800.01.T01,FtPinG0009236200.01.T01,FtPinG000083600…
Biological process	cellular response to abiotic stimulus	GO:0071214	5	0.00268008	2.07788	18	200	537	12398	FtPinG0003249200.01.T01,FtPinG0004676200.01.T01,FtPinG0001614800.01.T01,FtPinG0002971600.01.T01,FtPinG0005526700.01.T01,FtPinG0009078900.01.T01,FtPinG0008023100.01.T01,FtPinG0001290100.01.T01,FtPinG0000524800.01.T01,FtPinG0003140900.01.T01,FtPinG0001388600.01.T01,FtPinG0008617900.01.T01,FtPinG0002390000.01.T01,FtPinG0008341400.01.T01,FtPinG0002661000.01.T01,FtPinG0004924000.01.T01,FtPinG000707950…
Biological process	cellular response to environmental stimulus	GO:0104004	4	0.00268008	2.07788	18	200	537	12398	FtPinG0003249200.01.T01,FtPinG0004676200.01.T01,FtPinG0001614800.01.T01,FtPinG0002971600.01.T01,FtPinG0005526700.01.T01,FtPinG0009078900.01.T01,FtPinG0008023100.01.T01,FtPinG0001290100.01.T01,FtPinG0000524800.01.T01,FtPinG0003140900.01.T01,FtPinG0001388600.01.T01,FtPinG0008617900.01.T01,FtPinG0002390000.01.T01,FtPinG0008341400.01.T01,FtPinG0002661000.01.T01,FtPinG0004924000.01.T01,FtPinG000707950…
Biological process	cellular polysaccharide biosynthetic process	GO:0033692	7	0.0027897	2.24878	15	154	537	12398	FtPinG0006586600.01.T01,FtPinG0000386600.01.T01,FtPinG0007470100.01.T01,FtPinG0009670100.01.T01,FtPinG0002543800.01.T01,FtPinG0009636500.01.T01,FtPinG0003555100.01.T01,FtPinG0006247400.01.T01,FtPinG0002170900.01.T01,FtPinG0000034500.01.T01,FtPinG0004681300.01.T01,FtPinG0009906500.01.T01,FtPinG0004924000.01.T01,FtPinG0002695200.01.T01,FtPinG0006302300.01.T01,
Biological process	nitrate transport	GO:0015706	8	0.00306622	4.07427	6	34	537	12398	FtPinG0001054500.01.T01,FtPinG0005129800.01.T01,FtPinG0001049200.01.T01,FtPinG0004740900.01.T01,FtPinG0009258200.01.T01,FtPinG0001049400.01.T01,
Biological process	glucan biosynthetic process	GO:0009250	8	0.00363758	2.56528	11	99	537	12398	FtPinG0000386600.01.T01,FtPinG0007470100.01.T01,FtPinG0009670100.01.T01,FtPinG0002543800.01.T01,FtPinG0009636500.01.T01,FtPinG0006247400.01.T01,FtPinG0002170900.01.T01,FtPinG0004681300.01.T01,FtPinG0009906500.01.T01,FtPinG0004924000.01.T01,FtPinG0002695200.01.T01,
Biological process	cellular glucan metabolic process	GO:0006073	7	0.00378476	2.17807	15	159	537	12398	FtPinG0000386600.01.T01,FtPinG0003471500.01.T01,FtPinG0007470100.01.T01,FtPinG0009670100.01.T01,FtPinG0002543800.01.T01,FtPinG0009636500.01.T01,FtPinG0003540000.01.T01,FtPinG0006247400.01.T01,FtPinG0002170900.01.T01,FtPinG0006821300.01.T01,FtPinG0004681300.01.T01,FtPinG0006340900.01.T01,FtPinG0009906500.01.T01,FtPinG0004924000.01.T01,FtPinG0002695200.01.T01,
Biological process	response to external stimulus	GO:0009605	3	0.00382341	1.2969	96	1709	537	12398	FtPinG0009138800.01.T01,FtPinG0001421900.01.T01,FtPinG0009537100.01.T01,FtPinG0004425600.01.T01,FtPinG0006254200.01.T01,FtPinG0002178800.01.T01,FtPinG0004829100.01.T01,FtPinG0002810000.01.T01,FtPinG0001299600.01.T01,FtPinG0002415700.01.T01,FtPinG0004676200.01.T01,FtPinG0003042200.01.T01,FtPinG0001614800.01.T01,FtPinG0000169100.01.T01,FtPinG0000748000.01.T01,FtPinG0009230600.01.T01,FtPinG000934910…
Biological process	cellular polysaccharide metabolic process	GO:0044264	6	0.00449553	1.90021	20	243	537	12398	FtPinG0006586600.01.T01,FtPinG0000386600.01.T01,FtPinG0003471500.01.T01,FtPinG0007470100.01.T01,FtPinG0009670100.01.T01,FtPinG0002543800.01.T01,FtPinG0009636500.01.T01,FtPinG0003540000.01.T01,FtPinG0003555100.01.T01,FtPinG0006247400.01.T01,FtPinG0002170900.01.T01,FtPinG0006821300.01.T01,FtPinG0000034500.01.T01,FtPinG0004681300.01.T01,FtPinG0006340900.01.T01,FtPinG0009906500.01.T01,FtPinG000963370…
Biological process	cell wall polysaccharide biosynthetic process	GO:0070592	9	0.004943	2.7705	9	75	537	12398	FtPinG0006586600.01.T01,FtPinG0009670100.01.T01,FtPinG0002543800.01.T01,FtPinG0003555100.01.T01,FtPinG0000034500.01.T01,FtPinG0004681300.01.T01,FtPinG0004924000.01.T01,FtPinG0002695200.01.T01,FtPinG0006302300.01.T01,
Biological process	response to wounding	GO:0009611	4	0.00515336	1.73852	25	332	537	12398	FtPinG0002178800.01.T01,FtPinG0000748000.01.T01,FtPinG0002971600.01.T01,FtPinG0004169000.01.T01,FtPinG0004534500.01.T01,FtPinG0009495000.01.T01,FtPinG0008023100.01.T01,FtPinG0001045600.01.T01,FtPinG0000524800.01.T01,FtPinG0007581000.01.T01,FtPinG0005955200.01.T01,FtPinG0001471200.01.T01,FtPinG0002536300.01.T01,FtPinG0008617900.01.T01,FtPinG0006102500.01.T01,FtPinG0002390000.01.T01,FtPinG000974760…
Biological process	steroid metabolic process	GO:0008202	5	0.00530625	2.44195	11	104	537	12398	FtPinG0000570100.01.T01,FtPinG0001447100.01.T01,FtPinG0004697200.01.T01,FtPinG0001968600.01.T01,FtPinG0000614800.01.T01,FtPinG0002387400.01.T01,FtPinG0004449900.01.T01,FtPinG0008892200.01.T01,FtPinG0002376500.01.T01,FtPinG0004309900.01.T01,FtPinG0003229300.01.T01,
Biological process	glucan metabolic process	GO:0044042	6	0.00534407	2.09887	15	165	537	12398	FtPinG0000386600.01.T01,FtPinG0003471500.01.T01,FtPinG0007470100.01.T01,FtPinG0009670100.01.T01,FtPinG0002543800.01.T01,FtPinG0009636500.01.T01,FtPinG0003540000.01.T01,FtPinG0006247400.01.T01,FtPinG0002170900.01.T01,FtPinG0006821300.01.T01,FtPinG0004681300.01.T01,FtPinG0006340900.01.T01,FtPinG0009906500.01.T01,FtPinG0004924000.01.T01,FtPinG0002695200.01.T01,
Biological process	cellular component macromolecule biosynthetic process	GO:0070589	7	0.00640451	2.66394	9	78	537	12398	FtPinG0006586600.01.T01,FtPinG0009670100.01.T01,FtPinG0002543800.01.T01,FtPinG0003555100.01.T01,FtPinG0000034500.01.T01,FtPinG0004681300.01.T01,FtPinG0004924000.01.T01,FtPinG0002695200.01.T01,FtPinG0006302300.01.T01,
Biological process	cell wall macromolecule biosynthetic process	GO:0044038	8	0.00640451	2.66394	9	78	537	12398	FtPinG0006586600.01.T01,FtPinG0009670100.01.T01,FtPinG0002543800.01.T01,FtPinG0003555100.01.T01,FtPinG0000034500.01.T01,FtPinG0004681300.01.T01,FtPinG0004924000.01.T01,FtPinG0002695200.01.T01,FtPinG0006302300.01.T01,
Biological process	polysaccharide biosynthetic process	GO:0000271	6	0.00700867	2.03713	15	170	537	12398	FtPinG0006586600.01.T01,FtPinG0000386600.01.T01,FtPinG0007470100.01.T01,FtPinG0009670100.01.T01,FtPinG0002543800.01.T01,FtPinG0009636500.01.T01,FtPinG0003555100.01.T01,FtPinG0006247400.01.T01,FtPinG0002170900.01.T01,FtPinG0000034500.01.T01,FtPinG0004681300.01.T01,FtPinG0009906500.01.T01,FtPinG0004924000.01.T01,FtPinG0002695200.01.T01,FtPinG0006302300.01.T01,
Biological process	brassinosteroid metabolic process	GO:0016131	7	0.00794249	3.37866	6	41	537	12398	FtPinG0000570100.01.T01,FtPinG0004697200.01.T01,FtPinG0001968600.01.T01,FtPinG0000614800.01.T01,FtPinG0002387400.01.T01,FtPinG0008892200.01.T01,
Biological process	carbohydrate biosynthetic process	GO:0016051	5	0.00932248	1.77596	20	260	537	12398	FtPinG0001479500.01.T01,FtPinG0006586600.01.T01,FtPinG0000386600.01.T01,FtPinG0007470100.01.T01,FtPinG0001140600.01.T01,FtPinG0009670100.01.T01,FtPinG0002543800.01.T01,FtPinG0009636500.01.T01,FtPinG0003555100.01.T01,FtPinG0007089300.01.T01,FtPinG0006247400.01.T01,FtPinG0002170900.01.T01,FtPinG0005493100.01.T01,FtPinG0001874200.01.T01,FtPinG0000034500.01.T01,FtPinG0004681300.01.T01,FtPinG000990650…
Biological process	phytosteroid metabolic process	GO:0016128	6	0.0100149	3.22151	6	43	537	12398	FtPinG0000570100.01.T01,FtPinG0004697200.01.T01,FtPinG0001968600.01.T01,FtPinG0000614800.01.T01,FtPinG0002387400.01.T01,FtPinG0008892200.01.T01,
Biological process	lignin metabolic process	GO:0009808	6	0.0103008	2.47366	9	84	537	12398	FtPinG0000570100.01.T01,FtPinG0008141200.01.T01,FtPinG0009375700.01.T01,FtPinG0008704000.01.T01,FtPinG0001968600.01.T01,FtPinG0008390000.01.T01,FtPinG0003855800.01.T01,FtPinG0006531100.01.T01,FtPinG0003080000.01.T01,
Biological process	response to blue light	GO:0009637	6	0.0112442	2.30875	10	100	537	12398	FtPinG0003343100.01.T01,FtPinG0004168100.01.T01,FtPinG0004676200.01.T01,FtPinG0009349100.01.T01,FtPinG0000836000.01.T01,FtPinG0009088500.01.T01,FtPinG0004400100.01.T01,FtPinG0001388600.01.T01,FtPinG0009525500.01.T01,FtPinG0003373300.01.T01,
Biological process	brassinosteroid biosynthetic process	GO:0016132	8	0.0114342	3.60743	5	32	537	12398	FtPinG0000570100.01.T01,FtPinG0001968600.01.T01,FtPinG0000614800.01.T01,FtPinG0002387400.01.T01,FtPinG0008892200.01.T01,
Biological process	shoot system development	GO:0048367	5	0.0114608	1.34468	59	1013	537	12398	FtPinG0001479500.01.T01,FtPinG0002336500.01.T01,FtPinG0000683600.01.T01,FtPinG0004168100.01.T01,FtPinG0004829100.01.T01,FtPinG0008616100.01.T01,FtPinG0004718200.01.T01,FtPinG0004676200.01.T01,FtPinG0001938900.01.T01,FtPinG0008557700.01.T01,FtPinG0003471500.01.T01,FtPinG0000894900.01.T01,FtPinG0003375700.01.T01,FtPinG0000836000.01.T01,FtPinG0003751600.01.T01,FtPinG0004414300.01.T01,FtPinG000294260…
Biological process	response to stimulus	GO:0050896	2	0.0117594	1.10106	285	5976	537	12398	FtPinG0000230400.01.T01,FtPinG0009138800.01.T01,FtPinG0005348000.01.T01,FtPinG0003343100.01.T01,FtPinG0001479500.01.T01,FtPinG0003249200.01.T01,FtPinG0000533700.01.T01,FtPinG0001701800.01.T01,FtPinG0005977600.01.T01,FtPinG0001421900.01.T01,FtPinG0009537100.01.T01,FtPinG0004425600.01.T01,FtPinG0006586600.01.T01,FtPinG0006254200.01.T01,FtPinG0002964900.01.T01,FtPinG0002664900.01.T01,FtPinG000065610…
Biological process	cell wall macromolecule metabolic process	GO:0044036	6	0.0120178	2.09887	12	132	537	12398	FtPinG0006586600.01.T01,FtPinG0003645700.01.T01,FtPinG0003471500.01.T01,FtPinG0009670100.01.T01,FtPinG0002543800.01.T01,FtPinG0003555100.01.T01,FtPinG0000034500.01.T01,FtPinG0004681300.01.T01,FtPinG0009633700.01.T01,FtPinG0004924000.01.T01,FtPinG0002695200.01.T01,FtPinG0006302300.01.T01,
Biological process	plant-type secondary cell wall biogenesis	GO:0009834	7	0.0123311	2.56528	8	72	537	12398	FtPinG0000570100.01.T01,FtPinG0001968600.01.T01,FtPinG0006190400.01.T01,FtPinG0009670100.01.T01,FtPinG0002543800.01.T01,FtPinG0006548000.01.T01,FtPinG0006531100.01.T01,FtPinG0002695200.01.T01,
Biological process	polysaccharide metabolic process	GO:0005976	5	0.0128678	1.69524	21	286	537	12398	FtPinG0006586600.01.T01,FtPinG0000386600.01.T01,FtPinG0003471500.01.T01,FtPinG0007470100.01.T01,FtPinG0009670100.01.T01,FtPinG0002543800.01.T01,FtPinG0009636500.01.T01,FtPinG0003540000.01.T01,FtPinG0003555100.01.T01,FtPinG0006247400.01.T01,FtPinG0002170900.01.T01,FtPinG0006821300.01.T01,FtPinG0000034500.01.T01,FtPinG0004681300.01.T01,FtPinG0006340900.01.T01,FtPinG0009906500.01.T01,FtPinG000963370…
Biological process	cellular response to auxin stimulus	GO:0071365	7	0.0132162	1.77596	18	234	537	12398	FtPinG0002664900.01.T01,FtPinG0002415700.01.T01,FtPinG0002692300.01.T01,FtPinG0005811200.01.T01,FtPinG0005348800.01.T01,FtPinG0004414300.01.T01,FtPinG0006548000.01.T01,FtPinG0001726900.01.T01,FtPinG0008442000.01.T01,FtPinG0001290100.01.T01,FtPinG0007036800.01.T01,FtPinG0007581000.01.T01,FtPinG0007034500.01.T01,FtPinG0009525500.01.T01,FtPinG0009684400.01.T01,FtPinG0005832200.01.T01,FtPinG000867600…
Biological process	cell wall polysaccharide metabolic process	GO:0010383	7	0.0132852	2.15223	11	118	537	12398	FtPinG0006586600.01.T01,FtPinG0003471500.01.T01,FtPinG0009670100.01.T01,FtPinG0002543800.01.T01,FtPinG0003555100.01.T01,FtPinG0000034500.01.T01,FtPinG0004681300.01.T01,FtPinG0009633700.01.T01,FtPinG0004924000.01.T01,FtPinG0002695200.01.T01,FtPinG0006302300.01.T01,
Biological process	systemic acquired resistance	GO:0009627	7	0.0144108	2.49595	8	74	537	12398	FtPinG0009138800.01.T01,FtPinG0004829100.01.T01,FtPinG0000570600.01.T01,FtPinG0000570800.01.T01,FtPinG0003405200.01.T01,FtPinG0005493100.01.T01,FtPinG0003405600.01.T01,FtPinG0009633700.01.T01,
Biological process	obsolete oxidation-reduction process	GO:0055114	0	0.0144681	1.32114	61	1066	537	12398	FtPinG0001701800.01.T01,FtPinG0001421900.01.T01,FtPinG0005126800.01.T01,FtPinG0002979000.01.T01,FtPinG0004697200.01.T01,FtPinG0002810000.01.T01,FtPinG0001186100.01.T01,FtPinG0002371500.01.T01,FtPinG0000614800.01.T01,FtPinG0008706600.01.T01,FtPinG0006479000.01.T01,FtPinG0004792800.01.T01,FtPinG0006708000.01.T01,FtPinG0009670100.01.T01,FtPinG0006434900.01.T01,FtPinG0002952800.01.T01,FtPinG000254380…
Biological process	carbohydrate metabolic process	GO:0005975	4	0.0145464	1.4783	34	531	537	12398	FtPinG0001479500.01.T01,FtPinG0006586600.01.T01,FtPinG0002178800.01.T01,FtPinG0000386600.01.T01,FtPinG0003471500.01.T01,FtPinG0007470100.01.T01,FtPinG0004911400.01.T01,FtPinG0001140600.01.T01,FtPinG0009670100.01.T01,FtPinG0002543800.01.T01,FtPinG0009636500.01.T01,FtPinG0002971600.01.T01,FtPinG0003540000.01.T01,FtPinG0003555100.01.T01,FtPinG0007089300.01.T01,FtPinG0006247400.01.T01,FtPinG000217090…
Biological process	phytosteroid biosynthetic process	GO:0016129	7	0.0147225	3.39522	5	34	537	12398	FtPinG0000570100.01.T01,FtPinG0001968600.01.T01,FtPinG0000614800.01.T01,FtPinG0002387400.01.T01,FtPinG0008892200.01.T01,
Biological process	cellulose metabolic process	GO:0030243	9	0.0152623	2.94734	6	47	537	12398	FtPinG0000386600.01.T01,FtPinG0003471500.01.T01,FtPinG0009636500.01.T01,FtPinG0006247400.01.T01,FtPinG0002170900.01.T01,FtPinG0004924000.01.T01,
Biological process	steroid hormone biosynthetic process	GO:0120178	7	0.0165816	3.29822	5	35	537	12398	FtPinG0000570100.01.T01,FtPinG0001968600.01.T01,FtPinG0000614800.01.T01,FtPinG0002387400.01.T01,FtPinG0008892200.01.T01,
Biological process	photosynthesis, light harvesting	GO:0009765	5	0.0165816	3.29822	5	35	537	12398	FtPinG0003343100.01.T01,FtPinG0002326800.01.T01,FtPinG0002326900.01.T01,FtPinG0004698500.01.T01,FtPinG0000765800.01.T01,
Biological process	specification of axis polarity	GO:0065001	4	0.0165816	3.29822	5	35	537	12398	FtPinG0000894900.01.T01,FtPinG0000077600.01.T01,FtPinG0003085100.01.T01,FtPinG0004174400.01.T01,FtPinG0001189700.01.T01,
Biological process	response to other organism	GO:0051707	5	0.0166064	1.28678	69	1238	537	12398	FtPinG0009138800.01.T01,FtPinG0001421900.01.T01,FtPinG0009537100.01.T01,FtPinG0004425600.01.T01,FtPinG0006254200.01.T01,FtPinG0004829100.01.T01,FtPinG0002810000.01.T01,FtPinG0001299600.01.T01,FtPinG0003042200.01.T01,FtPinG0000169100.01.T01,FtPinG0000748000.01.T01,FtPinG0009230600.01.T01,FtPinG0000570600.01.T01,FtPinG0000212200.01.T01,FtPinG0001140600.01.T01,FtPinG0000570800.01.T01,FtPinG000759060…
Biological process	sterol metabolic process	GO:0016125	6	0.0167346	2.43027	8	76	537	12398	FtPinG0001447100.01.T01,FtPinG0000614800.01.T01,FtPinG0002387400.01.T01,FtPinG0004449900.01.T01,FtPinG0008892200.01.T01,FtPinG0002376500.01.T01,FtPinG0004309900.01.T01,FtPinG0003229300.01.T01,
Biological process	response to external biotic stimulus	GO:0043207	4	0.0174478	1.28367	69	1241	537	12398	FtPinG0009138800.01.T01,FtPinG0001421900.01.T01,FtPinG0009537100.01.T01,FtPinG0004425600.01.T01,FtPinG0006254200.01.T01,FtPinG0004829100.01.T01,FtPinG0002810000.01.T01,FtPinG0001299600.01.T01,FtPinG0003042200.01.T01,FtPinG0000169100.01.T01,FtPinG0000748000.01.T01,FtPinG0009230600.01.T01,FtPinG0000570600.01.T01,FtPinG0000212200.01.T01,FtPinG0001140600.01.T01,FtPinG0000570800.01.T01,FtPinG000759060…
Biological process	positive regulation of post-embryonic development	GO:0048582	7	0.0184383	1.97893	12	140	537	12398	FtPinG0001421900.01.T01,FtPinG0004168100.01.T01,FtPinG0001614800.01.T01,FtPinG0001938900.01.T01,FtPinG0000836000.01.T01,FtPinG0001939200.01.T01,FtPinG0004400100.01.T01,FtPinG0009078900.01.T01,FtPinG0004776500.01.T01,FtPinG0001938400.01.T01,FtPinG0007770500.01.T01,FtPinG0001053000.01.T01,
Biological process	auxin-activated signaling pathway	GO:0009734	7	0.0187905	1.77596	16	208	537	12398	FtPinG0002664900.01.T01,FtPinG0002415700.01.T01,FtPinG0002692300.01.T01,FtPinG0005811200.01.T01,FtPinG0005348800.01.T01,FtPinG0004414300.01.T01,FtPinG0006548000.01.T01,FtPinG0001726900.01.T01,FtPinG0008442000.01.T01,FtPinG0001290100.01.T01,FtPinG0007036800.01.T01,FtPinG0007581000.01.T01,FtPinG0007034500.01.T01,FtPinG0009525500.01.T01,FtPinG0009684400.01.T01,FtPinG0005832200.01.T01,
Biological process	response to biotic stimulus	GO:0009607	3	0.0189278	1.27852	69	1246	537	12398	FtPinG0009138800.01.T01,FtPinG0001421900.01.T01,FtPinG0009537100.01.T01,FtPinG0004425600.01.T01,FtPinG0006254200.01.T01,FtPinG0004829100.01.T01,FtPinG0002810000.01.T01,FtPinG0001299600.01.T01,FtPinG0003042200.01.T01,FtPinG0000169100.01.T01,FtPinG0000748000.01.T01,FtPinG0009230600.01.T01,FtPinG0000570600.01.T01,FtPinG0000212200.01.T01,FtPinG0001140600.01.T01,FtPinG0000570800.01.T01,FtPinG000759060…
Biological process	defense response	GO:0006952	4	0.0190348	1.29894	62	1102	537	12398	FtPinG0009138800.01.T01,FtPinG0005348000.01.T01,FtPinG0009537100.01.T01,FtPinG0004425600.01.T01,FtPinG0006254200.01.T01,FtPinG0002336500.01.T01,FtPinG0002178800.01.T01,FtPinG0004829100.01.T01,FtPinG0002810000.01.T01,FtPinG0001299600.01.T01,FtPinG0003042200.01.T01,FtPinG0000169100.01.T01,FtPinG0003471500.01.T01,FtPinG0009230600.01.T01,FtPinG0000570600.01.T01,FtPinG0000212200.01.T01,FtPinG000114060…
Biological process	cell fate specification	GO:0001708	4	0.0202715	2.7705	6	50	537	12398	FtPinG0000077600.01.T01,FtPinG0001688900.01.T01,FtPinG0003148900.01.T01,FtPinG0007822200.01.T01,FtPinG0008045400.01.T01,FtPinG0001189700.01.T01,
Biological process	beta-glucan metabolic process	GO:0051273	8	0.0202715	2.7705	6	50	537	12398	FtPinG0000386600.01.T01,FtPinG0003471500.01.T01,FtPinG0009636500.01.T01,FtPinG0006247400.01.T01,FtPinG0002170900.01.T01,FtPinG0004924000.01.T01,
Biological process	phloem or xylem histogenesis	GO:0010087	5	0.0218879	1.99971	11	127	537	12398	FtPinG0008141200.01.T01,FtPinG0002062300.01.T01,FtPinG0006190400.01.T01,FtPinG0003085100.01.T01,FtPinG0001726900.01.T01,FtPinG0000634000.01.T01,FtPinG0003991500.01.T01,FtPinG0006046800.01.T01,FtPinG0004293400.01.T01,FtPinG0005526900.01.T01,FtPinG0000385100.01.T01,
Biological process	cellular response to external stimulus	GO:0071496	4	0.0229987	1.60013	21	303	537	12398	FtPinG0001614800.01.T01,FtPinG0004414300.01.T01,FtPinG0000806900.01.T01,FtPinG0002971600.01.T01,FtPinG0005526700.01.T01,FtPinG0001049200.01.T01,FtPinG0004485800.01.T01,FtPinG0008563300.01.T01,FtPinG0009078900.01.T01,FtPinG0008184600.01.T01,FtPinG0008627600.01.T01,FtPinG0000524800.01.T01,FtPinG0003140900.01.T01,FtPinG0007957900.01.T01,FtPinG0008617900.01.T01,FtPinG0008891900.01.T01,FtPinG000239000…
Biological process	protein autophosphorylation	GO:0046777	9	0.0232069	1.69908	17	231	537	12398	FtPinG0000935800.01.T01,FtPinG0002733900.01.T01,FtPinG0000169100.01.T01,FtPinG0000748000.01.T01,FtPinG0000778200.01.T01,FtPinG0002492200.01.T01,FtPinG0001045600.01.T01,FtPinG0000688900.01.T01,FtPinG0009757300.01.T01,FtPinG0001388600.01.T01,FtPinG0002536300.01.T01,FtPinG0008617900.01.T01,FtPinG0003116200.01.T01,FtPinG0002390000.01.T01,FtPinG0009747600.01.T01,FtPinG0002009300.01.T01,FtPinG000014350…
Biological process	reproductive shoot system development	GO:0090567	6	0.0240009	1.41517	35	571	537	12398	FtPinG0002336500.01.T01,FtPinG0004168100.01.T01,FtPinG0008616100.01.T01,FtPinG0001938900.01.T01,FtPinG0008557700.01.T01,FtPinG0000894900.01.T01,FtPinG0004414300.01.T01,FtPinG0002942600.01.T01,FtPinG0003085100.01.T01,FtPinG0002560000.01.T01,FtPinG0001939200.01.T01,FtPinG0005737100.01.T01,FtPinG0004400100.01.T01,FtPinG0000379300.01.T01,FtPinG0005674700.01.T01,FtPinG0003515900.01.T01,FtPinG000514210…
Biological process	cell junction organization	GO:0034330	5	0.0255548	2.95994	5	39	537	12398	FtPinG0002178800.01.T01,FtPinG0009096400.01.T01,FtPinG0008617900.01.T01,FtPinG0002390000.01.T01,FtPinG0004924000.01.T01,
Biological process	post-embryonic development	GO:0009791	3	0.0266864	1.20966	93	1775	537	12398	FtPinG0002490200.01.T01,FtPinG0001421900.01.T01,FtPinG0001221400.01.T01,FtPinG0006254200.01.T01,FtPinG0000748300.01.T01,FtPinG0002664900.01.T01,FtPinG0002336500.01.T01,FtPinG0001097000.01.T01,FtPinG0002178800.01.T01,FtPinG0000935800.01.T01,FtPinG0000683600.01.T01,FtPinG0004168100.01.T01,FtPinG0008616100.01.T01,FtPinG0002415700.01.T01,FtPinG0001614800.01.T01,FtPinG0001938900.01.T01,FtPinG000855770…
Biological process	biological adhesion	GO:0022610	2	0.028201	2.88594	5	40	537	12398	FtPinG0002178800.01.T01,FtPinG0003085100.01.T01,FtPinG0008617900.01.T01,FtPinG0002390000.01.T01,FtPinG0008435400.01.T01,
Biological process	cell adhesion	GO:0007155	3	0.028201	2.88594	5	40	537	12398	FtPinG0002178800.01.T01,FtPinG0003085100.01.T01,FtPinG0008617900.01.T01,FtPinG0002390000.01.T01,FtPinG0008435400.01.T01,
Biological process	photosynthesis, light reaction	GO:0019684	5	0.0291576	2.07788	9	100	537	12398	FtPinG0003343100.01.T01,FtPinG0001186100.01.T01,FtPinG0002326800.01.T01,FtPinG0008706600.01.T01,FtPinG0002326900.01.T01,FtPinG0001976400.01.T01,FtPinG0004698500.01.T01,FtPinG0000765800.01.T01,FtPinG0008444600.01.T01,
Biological process	protein phosphorylation	GO:0006468	8	0.0305431	1.29486	53	945	537	12398	FtPinG0000230400.01.T01,FtPinG0009537100.01.T01,FtPinG0002464900.01.T01,FtPinG0002964900.01.T01,FtPinG0000935800.01.T01,FtPinG0002025900.01.T01,FtPinG0001299600.01.T01,FtPinG0007216300.01.T01,FtPinG0002733900.01.T01,FtPinG0000169100.01.T01,FtPinG0000748000.01.T01,FtPinG0002064100.01.T01,FtPinG0003085100.01.T01,FtPinG0005526700.01.T01,FtPinG0001577200.01.T01,FtPinG0006651800.01.T01,FtPinG000804920…
Biological process	oligosaccharide metabolic process	GO:0009311	5	0.0305843	2.17294	8	85	537	12398	FtPinG0001479500.01.T01,FtPinG0004911400.01.T01,FtPinG0003540000.01.T01,FtPinG0006821300.01.T01,FtPinG0005493100.01.T01,FtPinG0001874200.01.T01,FtPinG0004361700.01.T01,FtPinG0009903300.01.T01,
Biological process	cellular carbohydrate metabolic process	GO:0044262	5	0.0317389	1.51286	23	351	537	12398	FtPinG0001479500.01.T01,FtPinG0006586600.01.T01,FtPinG0000386600.01.T01,FtPinG0003471500.01.T01,FtPinG0007470100.01.T01,FtPinG0009670100.01.T01,FtPinG0002543800.01.T01,FtPinG0009636500.01.T01,FtPinG0003540000.01.T01,FtPinG0003555100.01.T01,FtPinG0006247400.01.T01,FtPinG0002170900.01.T01,FtPinG0006821300.01.T01,FtPinG0001874200.01.T01,FtPinG0000034500.01.T01,FtPinG0004681300.01.T01,FtPinG000634090…
Biological process	cellular response to endogenous stimulus	GO:0071495	4	0.0325786	1.27289	58	1052	537	12398	FtPinG0003343100.01.T01,FtPinG0002664900.01.T01,FtPinG0005187800.01.T01,FtPinG0004829100.01.T01,FtPinG0008616100.01.T01,FtPinG0002415700.01.T01,FtPinG0002692300.01.T01,FtPinG0001614800.01.T01,FtPinG0009230600.01.T01,FtPinG0005811200.01.T01,FtPinG0009349100.01.T01,FtPinG0000570600.01.T01,FtPinG0005348800.01.T01,FtPinG0000570800.01.T01,FtPinG0004414300.01.T01,FtPinG0007664800.01.T01,FtPinG000800810…
Biological process	cellular response to hormone stimulus	GO:0032870	6	0.0325788	1.28264	55	990	537	12398	FtPinG0003343100.01.T01,FtPinG0002664900.01.T01,FtPinG0005187800.01.T01,FtPinG0004829100.01.T01,FtPinG0008616100.01.T01,FtPinG0002415700.01.T01,FtPinG0002692300.01.T01,FtPinG0001614800.01.T01,FtPinG0009230600.01.T01,FtPinG0005811200.01.T01,FtPinG0009349100.01.T01,FtPinG0000570600.01.T01,FtPinG0005348800.01.T01,FtPinG0000570800.01.T01,FtPinG0004414300.01.T01,FtPinG0007664800.01.T01,FtPinG000800810…
Biological process	response to endogenous stimulus	GO:0009719	3	0.0337725	1.18763	100	1944	537	12398	FtPinG0003343100.01.T01,FtPinG0000533700.01.T01,FtPinG0001421900.01.T01,FtPinG0002664900.01.T01,FtPinG0002336500.01.T01,FtPinG0002727000.01.T01,FtPinG0005187800.01.T01,FtPinG0002178800.01.T01,FtPinG0004448500.01.T01,FtPinG0000683600.01.T01,FtPinG0004829100.01.T01,FtPinG0004697200.01.T01,FtPinG0001299600.01.T01,FtPinG0008616100.01.T01,FtPinG0005196300.01.T01,FtPinG0002415700.01.T01,FtPinG000269230…
Biological process	reproductive system development	GO:0061458	5	0.0337883	1.23408	72	1347	537	12398	FtPinG0002490200.01.T01,FtPinG0001221400.01.T01,FtPinG0006254200.01.T01,FtPinG0002336500.01.T01,FtPinG0002178800.01.T01,FtPinG0000935800.01.T01,FtPinG0004168100.01.T01,FtPinG0008616100.01.T01,FtPinG0002415700.01.T01,FtPinG0001938900.01.T01,FtPinG0008557700.01.T01,FtPinG0000894900.01.T01,FtPinG0000077600.01.T01,FtPinG0003751600.01.T01,FtPinG0004414300.01.T01,FtPinG0002942600.01.T01,FtPinG000308510…
Biological process	reproductive structure development	GO:0048608	4	0.0337883	1.23408	72	1347	537	12398	FtPinG0002490200.01.T01,FtPinG0001221400.01.T01,FtPinG0006254200.01.T01,FtPinG0002336500.01.T01,FtPinG0002178800.01.T01,FtPinG0000935800.01.T01,FtPinG0004168100.01.T01,FtPinG0008616100.01.T01,FtPinG0002415700.01.T01,FtPinG0001938900.01.T01,FtPinG0008557700.01.T01,FtPinG0000894900.01.T01,FtPinG0000077600.01.T01,FtPinG0003751600.01.T01,FtPinG0004414300.01.T01,FtPinG0002942600.01.T01,FtPinG000308510…
Biological process	biological process involved in interspecies interaction between organisms	GO:0044419	2	0.0353324	1.23779	69	1287	537	12398	FtPinG0009138800.01.T01,FtPinG0001421900.01.T01,FtPinG0009537100.01.T01,FtPinG0004425600.01.T01,FtPinG0006254200.01.T01,FtPinG0004829100.01.T01,FtPinG0002810000.01.T01,FtPinG0001299600.01.T01,FtPinG0003042200.01.T01,FtPinG0000169100.01.T01,FtPinG0000748000.01.T01,FtPinG0009230600.01.T01,FtPinG0000570600.01.T01,FtPinG0000212200.01.T01,FtPinG0001140600.01.T01,FtPinG0000570800.01.T01,FtPinG000759060…
Biological process	cellular protein complex disassembly	GO:0043624	7	0.0360168	2.43027	6	57	537	12398	FtPinG0005196500.01.T01,FtPinG0002733900.01.T01,FtPinG0007953800.01.T01,FtPinG0007953600.01.T01,FtPinG0007289200.01.T01,FtPinG0000143500.01.T01,
Biological process	cellulose biosynthetic process	GO:0030244	10	0.037154	2.6846	5	43	537	12398	FtPinG0000386600.01.T01,FtPinG0009636500.01.T01,FtPinG0006247400.01.T01,FtPinG0002170900.01.T01,FtPinG0004924000.01.T01,
Biological process	epithelium development	GO:0060429	5	0.038211	2.21387	7	73	537	12398	FtPinG0005348000.01.T01,FtPinG0002464900.01.T01,FtPinG0001688900.01.T01,FtPinG0007822200.01.T01,FtPinG0002149600.01.T01,FtPinG0005605400.01.T01,FtPinG0007018600.01.T01,
Biological process	plant-type cell wall organization	GO:0009664	7	0.0385014	1.77596	12	156	537	12398	FtPinG0005977600.01.T01,FtPinG0006586600.01.T01,FtPinG0003471500.01.T01,FtPinG0003085100.01.T01,FtPinG0003555100.01.T01,FtPinG0002017400.01.T01,FtPinG0009459200.01.T01,FtPinG0004087700.01.T01,FtPinG0002983400.01.T01,FtPinG0006020500.01.T01,FtPinG0004924000.01.T01,FtPinG0006302300.01.T01,
Biological process	multidimensional cell growth	GO:0009825	4	0.0387639	2.38836	6	58	537	12398	FtPinG0005977600.01.T01,FtPinG0009540300.01.T01,FtPinG0002170900.01.T01,FtPinG0008891900.01.T01,FtPinG0004924000.01.T01,FtPinG0008435400.01.T01,
Biological process	response to hormone	GO:0009725	5	0.0416269	1.18054	97	1897	537	12398	FtPinG0003343100.01.T01,FtPinG0000533700.01.T01,FtPinG0001421900.01.T01,FtPinG0002664900.01.T01,FtPinG0002336500.01.T01,FtPinG0002727000.01.T01,FtPinG0005187800.01.T01,FtPinG0002178800.01.T01,FtPinG0004448500.01.T01,FtPinG0000683600.01.T01,FtPinG0004829100.01.T01,FtPinG0004697200.01.T01,FtPinG0001299600.01.T01,FtPinG0008616100.01.T01,FtPinG0005196300.01.T01,FtPinG0002415700.01.T01,FtPinG000269230…
Biological process	tissue development	GO:0009888	4	0.0426949	1.27431	51	924	537	12398	FtPinG0005348000.01.T01,FtPinG0002464900.01.T01,FtPinG0008141200.01.T01,FtPinG0002178800.01.T01,FtPinG0000935800.01.T01,FtPinG0008616100.01.T01,FtPinG0003471500.01.T01,FtPinG0002062300.01.T01,FtPinG0002464100.01.T01,FtPinG0000077600.01.T01,FtPinG0009540300.01.T01,FtPinG0006190400.01.T01,FtPinG0005348800.01.T01,FtPinG0002942600.01.T01,FtPinG0003085100.01.T01,FtPinG0005606600.01.T01,FtPinG000552670…
Biological process	hormone metabolic process	GO:0042445	5	0.0428433	1.51394	20	305	537	12398	FtPinG0000570100.01.T01,FtPinG0001421900.01.T01,FtPinG0002979000.01.T01,FtPinG0004697200.01.T01,FtPinG0001968600.01.T01,FtPinG0000614800.01.T01,FtPinG0007664800.01.T01,FtPinG0006548000.01.T01,FtPinG0009495000.01.T01,FtPinG0003140900.01.T01,FtPinG0009757300.01.T01,FtPinG0002387400.01.T01,FtPinG0002677700.01.T01,FtPinG0008409000.01.T01,FtPinG0008892200.01.T01,FtPinG0000227200.01.T01,FtPinG000777050…
Biological process	lignin biosynthetic process	GO:0009809	7	0.0432873	2.15484	7	75	537	12398	FtPinG0008141200.01.T01,FtPinG0009375700.01.T01,FtPinG0008704000.01.T01,FtPinG0008390000.01.T01,FtPinG0003855800.01.T01,FtPinG0006531100.01.T01,FtPinG0003080000.01.T01,
Biological process	defense response to other organism	GO:0098542	6	0.0435957	1.26908	52	946	537	12398	FtPinG0009138800.01.T01,FtPinG0009537100.01.T01,FtPinG0004425600.01.T01,FtPinG0006254200.01.T01,FtPinG0004829100.01.T01,FtPinG0002810000.01.T01,FtPinG0003042200.01.T01,FtPinG0000169100.01.T01,FtPinG0009230600.01.T01,FtPinG0000570600.01.T01,FtPinG0000212200.01.T01,FtPinG0001140600.01.T01,FtPinG0000570800.01.T01,FtPinG0003405200.01.T01,FtPinG0002971600.01.T01,FtPinG0003085100.01.T01,FtPinG000552670…
Biological process	response to red or far red light	GO:0009639	6	0.0439797	1.62588	15	213	537	12398	FtPinG0003343100.01.T01,FtPinG0002664900.01.T01,FtPinG0004168100.01.T01,FtPinG0004676200.01.T01,FtPinG0003380800.01.T01,FtPinG0003375700.01.T01,FtPinG0000836000.01.T01,FtPinG0008008100.01.T01,FtPinG0005142100.01.T01,FtPinG0001290100.01.T01,FtPinG0002387400.01.T01,FtPinG0009525500.01.T01,FtPinG0002474100.01.T01,FtPinG0002562700.01.T01,FtPinG0000608600.01.T01,
Biological process	response to far red light	GO:0010218	7	0.0439884	2.56528	5	45	537	12398	FtPinG0003343100.01.T01,FtPinG0004168100.01.T01,FtPinG0004676200.01.T01,FtPinG0001290100.01.T01,FtPinG0009525500.01.T01,
Biological process	signal transduction	GO:0007165	5	0.0448047	1.18169	93	1817	537	12398	FtPinG0000230400.01.T01,FtPinG0005348000.01.T01,FtPinG0002964900.01.T01,FtPinG0002664900.01.T01,FtPinG0002178800.01.T01,FtPinG0000935800.01.T01,FtPinG0002025900.01.T01,FtPinG0004829100.01.T01,FtPinG0001299600.01.T01,FtPinG0008616100.01.T01,FtPinG0002415700.01.T01,FtPinG0004676200.01.T01,FtPinG0002692300.01.T01,FtPinG0001614800.01.T01,FtPinG0007216300.01.T01,FtPinG0000169100.01.T01,FtPinG000074800…
Biological process	positive regulation of developmental process	GO:0051094	5	0.0450068	1.59224	16	232	537	12398	FtPinG0005845700.01.T01,FtPinG0001421900.01.T01,FtPinG0004168100.01.T01,FtPinG0001614800.01.T01,FtPinG0001938900.01.T01,FtPinG0000836000.01.T01,FtPinG0001939200.01.T01,FtPinG0004400100.01.T01,FtPinG0009078900.01.T01,FtPinG0007581000.01.T01,FtPinG0004776500.01.T01,FtPinG0001938400.01.T01,FtPinG0007770500.01.T01,FtPinG0001053000.01.T01,FtPinG0004174400.01.T01,FtPinG0007018600.01.T01,
Biological process	cellular response to extracellular stimulus	GO:0031668	5	0.0451814	1.52314	19	288	537	12398	FtPinG0001614800.01.T01,FtPinG0004414300.01.T01,FtPinG0000806900.01.T01,FtPinG0002971600.01.T01,FtPinG0005526700.01.T01,FtPinG0001049200.01.T01,FtPinG0004485800.01.T01,FtPinG0008563300.01.T01,FtPinG0009078900.01.T01,FtPinG0008184600.01.T01,FtPinG0008627600.01.T01,FtPinG0003140900.01.T01,FtPinG0007957900.01.T01,FtPinG0008617900.01.T01,FtPinG0008891900.01.T01,FtPinG0002390000.01.T01,FtPinG000089930…
Biological process	cell communication	GO:0007154	3	0.0459276	1.16604	105	2079	537	12398	FtPinG0000230400.01.T01,FtPinG0005348000.01.T01,FtPinG0002964900.01.T01,FtPinG0002664900.01.T01,FtPinG0002178800.01.T01,FtPinG0000935800.01.T01,FtPinG0002025900.01.T01,FtPinG0004829100.01.T01,FtPinG0001299600.01.T01,FtPinG0008616100.01.T01,FtPinG0002415700.01.T01,FtPinG0004676200.01.T01,FtPinG0002692300.01.T01,FtPinG0001614800.01.T01,FtPinG0007216300.01.T01,FtPinG0000169100.01.T01,FtPinG000074800…
Biological process	flower development	GO:0009908	7	0.0464164	1.35567	33	562	537	12398	FtPinG0004168100.01.T01,FtPinG0008616100.01.T01,FtPinG0001938900.01.T01,FtPinG0008557700.01.T01,FtPinG0000894900.01.T01,FtPinG0004414300.01.T01,FtPinG0002942600.01.T01,FtPinG0002560000.01.T01,FtPinG0001939200.01.T01,FtPinG0005737100.01.T01,FtPinG0004400100.01.T01,FtPinG0000379300.01.T01,FtPinG0005674700.01.T01,FtPinG0003515900.01.T01,FtPinG0005142100.01.T01,FtPinG0002277100.01.T01,FtPinG000201740…
Biological process	organic cyclic compound biosynthetic process	GO:1901362	5	0.0473855	1.14164	130	2629	537	12398	FtPinG0009138800.01.T01,FtPinG0002490200.01.T01,FtPinG0000570100.01.T01,FtPinG0001221400.01.T01,FtPinG0006586600.01.T01,FtPinG0008141200.01.T01,FtPinG0001447100.01.T01,FtPinG0002664400.01.T01,FtPinG0001368400.01.T01,FtPinG0002336500.01.T01,FtPinG0009285400.01.T01,FtPinG0002979000.01.T01,FtPinG0000683600.01.T01,FtPinG0004168100.01.T01,FtPinG0004829100.01.T01,FtPinG0009375700.01.T01,FtPinG000129960…
Biological process	beta-glucan biosynthetic process	GO:0051274	9	0.0476694	2.50951	5	46	537	12398	FtPinG0000386600.01.T01,FtPinG0009636500.01.T01,FtPinG0006247400.01.T01,FtPinG0002170900.01.T01,FtPinG0004924000.01.T01,
