# Supplementary material for: Comparative physiological, transcriptomic, and WGCNA analyses reveal the key genes and regulatory pathways associated with drought tolerance in Tartary buckwheat
Source: Front Plant Sci. 2022 Oct 3;13:985088. doi: 10.3389/fpls.2022.985088 (PMC9575659; doi:10.3389/fpls.2022.985088)
Supplement: Supplementary file 6 [file Table_4.xlsx]

## Sheet: Sheet1
Table S4 KEGG enrichment analysis of the up- and -down regulated drought response genes of LK3 vs XZSN
Term Name	MainClass	GeneHitsInSelectedSet	AllGenesInSelectedSet	GeneHitsInBackground	AllGenesInBackground	p-value	enrichFactor	GeneListInSelectedSets
Up-regulated genes
Chaperones and folding catalysts	Brite Hierarchies	38	498	397	12990	1.89274e-07	2.49674	[FtPinG0007992100.01.T01, FtPinG0008850600.01.T01, FtPinG0008299600.01.T01, FtPinG0006872800.01.T01, FtPinG0007705700.01.T01, FtPinG0007769400.01.T01, FtPinG0007587800.01.T01, FtPinG0002238800.01.T01, FtPinG0009502500.01.T01, FtPinG0003306800.01.T01, FtPinG0003499600.01.T01, FtPinG0002401400.01.T01, FtPinG0008433800.01.T01, FtPinG0009530300.01.T01, FtPinG0001311200.01.T01, FtPinG0001636600.01.T01…
Metabolism	Metabolism	188	498	3695	12990	2.9758e-06	1.32716	[FtPinG0001615200.01.T01, FtPinG0009513400.01.T01, FtPinG0002245700.01.T01, FtPinG0007648900.01.T01, FtPinG0005978600.01.T01, FtPinG0006315700.01.T01, FtPinG0005933600.01.T01, FtPinG0008694700.01.T01, FtPinG0003111900.01.T01, FtPinG0002352100.01.T01, FtPinG0001295500.01.T01, FtPinG0007406000.01.T01, FtPinG0000615900.01.T01, FtPinG0003131500.01.T01, FtPinG0009431800.01.T01, FtPinG0007754400.01.T01…
Lipid metabolism	Metabolism	41	498	552	12990	3.79296e-05	1.93742	[FtPinG0009711100.01.T01, FtPinG0000544600.01.T01, FtPinG0009513400.01.T01, FtPinG0007959300.01.T01, FtPinG0002511700.01.T01, FtPinG0003229300.01.T01, FtPinG0007648900.01.T01, FtPinG0005978600.01.T01, FtPinG0007987500.01.T01, FtPinG0007460900.01.T01, FtPinG0001125800.01.T01, FtPinG0001479200.01.T01, FtPinG0008694700.01.T01, FtPinG0002352100.01.T01, FtPinG0000631400.01.T01, FtPinG0009513200.01.T01…
Galactose metabolism	Metabolism	12	498	94	12990	0.000241401	3.32992	[FtPinG0004930600.01.T01, FtPinG0008416400.01.T01, FtPinG0002370000.01.T01, FtPinG0006247600.01.T01, FtPinG0006394700.01.T01, FtPinG0007461700.01.T01, FtPinG0006867700.01.T01, FtPinG0000692300.01.T01, FtPinG0002937900.01.T01, FtPinG0009572900.01.T01, FtPinG0000391000.01.T01, FtPinG0005517700.01.T01]
Protein processing in endoplasmic reticulum	Genetic Information Processing	25	498	303	12990	0.000266258	2.15217	[FtPinG0007297000.01.T01, FtPinG0007769400.01.T01, FtPinG0003557300.01.T01, FtPinG0002238800.01.T01, FtPinG0009502500.01.T01, FtPinG0002401400.01.T01, FtPinG0000580500.01.T01, FtPinG0008433800.01.T01, FtPinG0003759700.01.T01, FtPinG0009470100.01.T01, FtPinG0009211600.01.T01, FtPinG0009469200.01.T01, FtPinG0006725700.01.T01, FtPinG0003316500.01.T01, FtPinG0004044400.01.T01, FtPinG0005484200.01.T01…
Cutin, suberine and wax biosynthesis	Metabolism	7	498	43	12990	0.00113379	4.24629	[FtPinG0000544600.01.T01, FtPinG0009513200.01.T01, FtPinG0009513400.01.T01, FtPinG0008958400.01.T01, FtPinG0003448100.01.T01, FtPinG0003238300.01.T01, FtPinG0008694700.01.T01]
Carbohydrate metabolism	Metabolism	64	498	1153	12990	0.00156949	1.44787	[FtPinG0004064400.01.T01, FtPinG0007242500.01.T01, FtPinG0009596700.01.T01, FtPinG0002245700.01.T01, FtPinG0006394700.01.T01, FtPinG0006384900.01.T01, FtPinG0005008500.01.T01, FtPinG0001479200.01.T01, FtPinG0005730500.01.T01, FtPinG0005721000.01.T01, FtPinG0005796700.01.T01, FtPinG0000615900.01.T01, FtPinG0001471600.01.T01, FtPinG0006867700.01.T01, FtPinG0002764000.01.T01, FtPinG0008957600.01.T01…
Biosynthesis of other secondary metabolites	Metabolism	34	498	525	12990	0.00197254	1.68927	[FtPinG0009711100.01.T01, FtPinG0001861600.01.T01, FtPinG0008251700.01.T01, FtPinG0001615200.01.T01, FtPinG0006384900.01.T01, FtPinG0005533300.01.T01, FtPinG0005008500.01.T01, FtPinG0006315700.01.T01, FtPinG0005933600.01.T01, FtPinG0001319300.01.T01, FtPinG0008145300.01.T01, FtPinG0001508400.01.T01, FtPinG0009431800.01.T01, FtPinG0003181300.01.T01, FtPinG0006867700.01.T01, FtPinG0003192300.01.T01…
Glycerolipid metabolism	Metabolism	11	498	109	12990	0.00304909	2.63236	[FtPinG0004930600.01.T01, FtPinG0000639900.01.T01, FtPinG0002352100.01.T01, FtPinG0000244500.01.T01, FtPinG0006486100.01.T01, FtPinG0007648900.01.T01, FtPinG0001471600.01.T01, FtPinG0005978600.01.T01, FtPinG0007987500.01.T01, FtPinG0007460900.01.T01, FtPinG0005264000.01.T01]
Alanine, aspartate and glutamate metabolism	Metabolism	8	498	71	12990	0.00563586	2.93908	[FtPinG0003296200.01.T01, FtPinG0003223000.01.T01, FtPinG0004264900.01.T01, FtPinG0005753100.01.T01, FtPinG0003294300.01.T01, FtPinG0001083800.01.T01, FtPinG0009549300.01.T01, FtPinG0008161600.01.T01]
Flavonoid biosynthesis	Metabolism	9	498	87	12990	0.00601804	2.69838	[FtPinG0003079800.01.T01, FtPinG0001861600.01.T01, FtPinG0008251700.01.T01, FtPinG0008145300.01.T01, FtPinG0007978200.01.T01, FtPinG0001508400.01.T01, FtPinG0005533300.01.T01, FtPinG0003454000.01.T01, FtPinG0005869600.01.T01]
Phenylpropanoid biosynthesis	Metabolism	20	498	285	12990	0.00686552	1.83048	[FtPinG0006661400.01.T01, FtPinG0001861600.01.T01, FtPinG0009077500.01.T01, FtPinG0001615200.01.T01, FtPinG0002937600.01.T01, FtPinG0007978200.01.T01, FtPinG0006384900.01.T01, FtPinG0005533300.01.T01, FtPinG0008236900.01.T01, FtPinG0005008500.01.T01, FtPinG0005933600.01.T01, FtPinG0002724300.01.T01, FtPinG0001319300.01.T01, FtPinG0003079800.01.T01, FtPinG0006668900.01.T01, FtPinG0001375600.01.T01…
Valine, leucine and isoleucine degradation	Metabolism	8	498	74	12990	0.00722883	2.81993	[FtPinG0009711100.01.T01, FtPinG0001088000.01.T01, FtPinG0003181300.01.T01, FtPinG0001471600.01.T01, FtPinG0002747100.01.T01, FtPinG0005753100.01.T01, FtPinG0006100300.01.T01, FtPinG0005996500.01.T01]
Stilbenoid, diarylheptanoid and gingerol biosynthesis	Metabolism	7	498	60	12990	0.00777846	3.04317	[FtPinG0003079800.01.T01, FtPinG0001861600.01.T01, FtPinG0007978200.01.T01, FtPinG0001508400.01.T01, FtPinG0005533300.01.T01, FtPinG0003454000.01.T01, FtPinG0005869600.01.T01]
Lipid biosynthesis proteins	Brite Hierarchies	10	498	116	12990	0.0135963	2.24865	[FtPinG0000639900.01.T01, FtPinG0009711100.01.T01, FtPinG0009084100.01.T01, FtPinG0004464800.01.T01, FtPinG0005978600.01.T01, FtPinG0007460900.01.T01, FtPinG0002180200.01.T01, FtPinG0005794400.01.T01, FtPinG0003551600.01.T01, FtPinG0009149300.01.T01]
Biosynthesis of unsaturated fatty acids	Metabolism	5	498	39	12990	0.0159465	3.34415	[FtPinG0009084100.01.T01, FtPinG0006100300.01.T01, FtPinG0005794400.01.T01, FtPinG0001479200.01.T01, FtPinG0005996500.01.T01]
Starch and sucrose metabolism	Metabolism	17	498	250	12990	0.0161128	1.77373	[FtPinG0006384900.01.T01, FtPinG0005008500.01.T01, FtPinG0008844900.01.T01, FtPinG0001910200.01.T01, FtPinG0002937900.01.T01, FtPinG0009572900.01.T01, FtPinG0005565800.01.T01, FtPinG0005730500.01.T01, FtPinG0008014900.01.T01, FtPinG0003197500.01.T01, FtPinG0002200200.01.T01, FtPinG0000615900.01.T01, FtPinG0008230700.01.T01, FtPinG0005109900.01.T01, FtPinG0006867700.01.T01, FtPinG0008957600.01.T01…
Amino acid metabolism	Metabolism	35	498	647	12990	0.0250126	1.41105	[FtPinG0009711100.01.T01, FtPinG0004556400.01.T01, FtPinG0001727900.01.T01, FtPinG0005008500.01.T01, FtPinG0005933600.01.T01, FtPinG0001005900.01.T01, FtPinG0000659100.01.T01, FtPinG0003296200.01.T01, FtPinG0003468300.01.T01, FtPinG0003223000.01.T01, FtPinG0009391400.01.T01, FtPinG0003181300.01.T01, FtPinG0001471600.01.T01, FtPinG0001244600.01.T01, FtPinG0006172400.01.T01, FtPinG0006446600.01.T01…
Carotenoid biosynthesis	Metabolism	5	498	45	12990	0.0280998	2.89826	[FtPinG0002378800.01.T01, FtPinG0003131500.01.T01, FtPinG0000246400.01.T01, FtPinG0007754400.01.T01, FtPinG0003175900.01.T01]
Fatty acid degradation	Metabolism	7	498	81	12990	0.0354889	2.2542	[FtPinG0004464800.01.T01, FtPinG0001471600.01.T01, FtPinG0006100300.01.T01, FtPinG0001479200.01.T01, FtPinG0009149300.01.T01, FtPinG0008694700.01.T01, FtPinG0005996500.01.T01]
Carbon fixation in photosynthetic organisms	Metabolism	8	498	99	12990	0.0361441	2.10783	[FtPinG0004064400.01.T01, FtPinG0007242500.01.T01, FtPinG0005943500.01.T01, FtPinG0002245700.01.T01, FtPinG0004264900.01.T01, FtPinG0008470300.01.T01, FtPinG0003294300.01.T01, FtPinG0009549300.01.T01]
Propanoate metabolism	Metabolism	5	498	51	12990	0.0449249	2.55729	[FtPinG0009711100.01.T01, FtPinG0000639400.01.T01, FtPinG0001088000.01.T01, FtPinG0002747100.01.T01, FtPinG0001479200.01.T01]
Not Included in Pathway or Brite	Not Included in Pathway or Brite	36	498	703	12990	0.0464997	1.33576	[FtPinG0006352600.01.T01, FtPinG0005859900.01.T01, FtPinG0000139400.01.T01, FtPinG0001923900.01.T01, FtPinG0008959000.01.T01, FtPinG0000375400.01.T01, FtPinG0002640200.01.T01, FtPinG0007162600.01.T01, FtPinG0008012700.01.T01, FtPinG0000657700.01.T01, FtPinG0007153100.01.T01, FtPinG0007531800.01.T01, FtPinG0002438900.01.T01, FtPinG0008278400.01.T01, FtPinG0000050100.01.T01, FtPinG0006547600.01.T01…
Glycerophospholipid metabolism	Metabolism	10	498	142	12990	0.0465235	1.83693	[FtPinG0000639900.01.T01, FtPinG0006883100.01.T01, FtPinG0002352100.01.T01, FtPinG0002511700.01.T01, FtPinG0006295300.01.T01, FtPinG0007648900.01.T01, FtPinG0005978600.01.T01, FtPinG0007460900.01.T01, FtPinG0001125800.01.T01, FtPinG0006802000.01.T01]
Signal transduction	Environmental Information Processing	33	498	637	12990	0.0482758	1.35131	[FtPinG0009633900.01.T01, FtPinG0006092000.01.T01, FtPinG0007648900.01.T01, FtPinG0004556400.01.T01, FtPinG0007990400.01.T01, FtPinG0005087800.01.T01, FtPinG0000493900.01.T01, FtPinG0001209500.01.T01, FtPinG0002143600.01.T01, FtPinG0004797700.01.T01, FtPinG0002352100.01.T01, FtPinG0007946400.01.T01, FtPinG0009367800.01.T01, FtPinG0002363800.01.T01, FtPinG0001869900.01.T01, FtPinG0002714200.01.T01…
Fatty acid biosynthesis	Metabolism	6	498	69	12990	0.0484513	2.2682	[FtPinG0009711100.01.T01, FtPinG0004464800.01.T01, FtPinG0000639400.01.T01, FtPinG0005794400.01.T01, FtPinG0003551600.01.T01, FtPinG0009149300.01.T01]
Amino acid related enzymes	Brite Hierarchies	9	498	124	12990	0.0488442	1.89322	[FtPinG0009276300.01.T01, FtPinG0004556400.01.T01, FtPinG0003181300.01.T01, FtPinG0004264900.01.T01, FtPinG0005753100.01.T01, FtPinG0001005900.01.T01, FtPinG0003294300.01.T01, FtPinG0009549300.01.T01, FtPinG0008690600.01.T01]
Down-regulated genes
Metabolism	Metabolism	205	497	3695	12990	3.01272e-10	1.45008	[FtPinG0000570800.01.T01, FtPinG0003343100.01.T01, FtPinG0001479500.01.T01, FtPinG0001113400.01.T01, FtPinG0006102500.01.T01, FtPinG0007126900.01.T01, FtPinG0000533700.01.T01, FtPinG0006482800.01.T01, FtPinG0002969500.01.T01, FtPinG0009441000.01.T01, FtPinG0002428800.01.T01, FtPinG0003170400.01.T01, FtPinG0005159300.01.T01, FtPinG0001701800.01.T01, FtPinG0002952800.01.T01, FtPinG0000484200.01.T01…
Photosynthesis proteins	Brite Hierarchies	21	497	110	12990	9.02872e-10	4.98976	[FtPinG0004182700.01.T01, FtPinG0003343100.01.T01, FtPinG0002699800.01.T01, FtPinG0003612400.01.T01, FtPinG0002501300.01.T01, FtPinG0004740200.01.T01, FtPinG0006708200.01.T01, FtPinG0004563500.01.T01, FtPinG0002326800.01.T01, FtPinG0008444600.01.T01, FtPinG0001186100.01.T01, FtPinG0006482800.01.T01, FtPinG0001447100.01.T01, FtPinG0009440100.01.T01, FtPinG0009441000.01.T01, FtPinG0006533200.01.T01…
Photosynthesis	Metabolism	16	497	91	12990	3.0463e-07	4.59548	[FtPinG0004182700.01.T01, FtPinG0002699800.01.T01, FtPinG0003612400.01.T01, FtPinG0002501300.01.T01, FtPinG0004740200.01.T01, FtPinG0006708200.01.T01, FtPinG0004563500.01.T01, FtPinG0008444600.01.T01, FtPinG0001186100.01.T01, FtPinG0006482800.01.T01, FtPinG0001447100.01.T01, FtPinG0009440100.01.T01, FtPinG0009441000.01.T01, FtPinG0009552800.01.T01, FtPinG0008116300.01.T01, FtPinG0006708000.01.T01]
Protein families: metabolism	Brite Hierarchies	139	497	2486	12990	7.08871e-07	1.46139	[FtPinG0003042200.01.T01, FtPinG0000570800.01.T01, FtPinG0008616900.01.T01, FtPinG0003343100.01.T01, FtPinG0004740200.01.T01, FtPinG0001032100.01.T01, FtPinG0007810900.01.T01, FtPinG0005605400.01.T01, FtPinG0006482800.01.T01, FtPinG0009440100.01.T01, FtPinG0009441000.01.T01, FtPinG0000150000.01.T01, FtPinG0009670100.01.T01, FtPinG0008116300.01.T01, FtPinG0006434900.01.T01, FtPinG0003987100.01.T01…
Energy metabolism	Metabolism	40	497	541	12990	4.99952e-05	1.93248	[FtPinG0004782300.01.T01, FtPinG0007242500.01.T01, FtPinG0008627600.01.T01, FtPinG0003343100.01.T01, FtPinG0000806900.01.T01, FtPinG0002501300.01.T01, FtPinG0004740200.01.T01, FtPinG0002510500.01.T01, FtPinG0001113400.01.T01, FtPinG0002326800.01.T01, FtPinG0001186100.01.T01, FtPinG0006482800.01.T01, FtPinG0009440100.01.T01, FtPinG0009441000.01.T01, FtPinG0002791500.01.T01, FtPinG0009547700.01.T01…
Steroid biosynthesis	Metabolism	8	497	37	12990	6.28715e-05	5.6512	[FtPinG0003229300.01.T01, FtPinG0000570100.01.T01, FtPinG0001447100.01.T01, FtPinG0004309900.01.T01, FtPinG0001088100.01.T01, FtPinG0004449900.01.T01, FtPinG0001968600.01.T01, FtPinG0008055200.01.T01]
Glycosyltransferases	Brite Hierarchies	31	497	381	12990	6.30217e-05	2.12662	[FtPinG0009636500.01.T01, FtPinG0000354100.01.T01, FtPinG0007770500.01.T01, FtPinG0006247400.01.T01, FtPinG0008935100.01.T01, FtPinG0008048900.01.T01, FtPinG0001032100.01.T01, FtPinG0007810900.01.T01, FtPinG0001420700.01.T01, FtPinG0002011600.01.T01, FtPinG0007033200.01.T01, FtPinG0005606600.01.T01, FtPinG0000034500.01.T01, FtPinG0009670100.01.T01, FtPinG0007470100.01.T01, FtPinG0003555100.01.T01…
Photosynthesis - antenna proteins	Metabolism	5	497	18	12990	0.000455015	7.26023	[FtPinG0002326800.01.T01, FtPinG0003343100.01.T01, FtPinG0006533200.01.T01, FtPinG0004698500.01.T01, FtPinG0002326900.01.T01]
Transporters	Brite Hierarchies	56	497	954	12990	0.000839831	1.53424	[FtPinG0005659600.01.T01, FtPinG0003424700.01.T01, FtPinG0004531000.01.T01, FtPinG0005370700.01.T01, FtPinG0004767100.01.T01, FtPinG0001049200.01.T01, FtPinG0007590600.01.T01, FtPinG0009899700.01.T01, FtPinG0002492300.01.T01, FtPinG0001411200.01.T01, FtPinG0000553000.01.T01, FtPinG0000533700.01.T01, FtPinG0003608400.01.T01, FtPinG0006482800.01.T01, FtPinG0005490000.01.T01, FtPinG0005489400.01.T01…
Cytochrome P450	Brite Hierarchies	18	497	206	12990	0.000951846	2.2838	[FtPinG0000614800.01.T01, FtPinG0006434900.01.T01, FtPinG0004788100.01.T01, FtPinG0003229300.01.T01, FtPinG0008277400.01.T01, FtPinG0004309900.01.T01, FtPinG0005145600.01.T01, FtPinG0007162900.01.T01, FtPinG0004787900.01.T01, FtPinG0002376500.01.T01, FtPinG0002979000.01.T01, FtPinG0003080000.01.T01, FtPinG0001413400.01.T01, FtPinG0002387400.01.T01, FtPinG0008892200.01.T01, FtPinG0004697200.01.T01…
Lipid metabolism	Metabolism	36	497	552	12990	0.00125485	1.70458	[FtPinG0000754400.01.T01, FtPinG0000987900.01.T01, FtPinG0003229300.01.T01, FtPinG0009443700.01.T01, FtPinG0007460900.01.T01, FtPinG0009495000.01.T01, FtPinG0002166400.01.T01, FtPinG0001968600.01.T01, FtPinG0008055200.01.T01, FtPinG0002376500.01.T01, FtPinG0001088100.01.T01, FtPinG0008981700.01.T01, FtPinG0005159300.01.T01, FtPinG0001389600.01.T01, FtPinG0006586600.01.T01, FtPinG0000775500.01.T01…
Tryptophan metabolism	Metabolism	12	497	118	12990	0.00185231	2.65798	[FtPinG0000754400.01.T01, FtPinG0007430100.01.T01, FtPinG0001701800.01.T01, FtPinG0000987900.01.T01, FtPinG0007664800.01.T01, FtPinG0007444900.01.T01, FtPinG0006046800.01.T01, FtPinG0007770500.01.T01, FtPinG0000227200.01.T01, FtPinG0008409000.01.T01, FtPinG0008324300.01.T01, FtPinG0002836500.01.T01]
Glyoxylate and dicarboxylate metabolism	Metabolism	9	497	82	12990	0.0040126	2.86868	[FtPinG0008872800.01.T01, FtPinG0001337300.01.T01, FtPinG0008981900.01.T01, FtPinG0002459200.01.T01, FtPinG0007444900.01.T01, FtPinG0009366300.01.T01, FtPinG0002068500.01.T01, FtPinG0006203600.01.T01, FtPinG0006587300.01.T01]
Glycosylphosphatidylinositol (GPI)-anchored proteins	Brite Hierarchies	5	497	30	12990	0.00518418	4.35614	[FtPinG0006204400.01.T01, FtPinG0005410400.01.T01, FtPinG0007777800.01.T01, FtPinG0005605400.01.T01, FtPinG0002149600.01.T01]
Amino acid metabolism	Metabolism	38	497	647	12990	0.00564954	1.53508	[FtPinG0000754400.01.T01, FtPinG0009283700.01.T01, FtPinG0007430100.01.T01, FtPinG0000987900.01.T01, FtPinG0001062400.01.T01, FtPinG0003106800.01.T01, FtPinG0000570800.01.T01, FtPinG0001258700.01.T01, FtPinG0005173600.01.T01, FtPinG0007770500.01.T01, FtPinG0008324300.01.T01, FtPinG0006413200.01.T01, FtPinG0001879900.01.T01, FtPinG0002969500.01.T01, FtPinG0006046800.01.T01, FtPinG0003170400.01.T01…
Biosynthesis of other secondary metabolites	Metabolism	32	497	525	12990	0.00633751	1.5931	[FtPinG0000754400.01.T01, FtPinG0000929100.01.T01, FtPinG0003957300.01.T01, FtPinG0000806900.01.T01, FtPinG0007770500.01.T01, FtPinG0008935100.01.T01, FtPinG0007162900.01.T01, FtPinG0007810900.01.T01, FtPinG0008381900.01.T01, FtPinG0004087700.01.T01, FtPinG0008704000.01.T01, FtPinG0009113600.01.T01, FtPinG0006020500.01.T01, FtPinG0002517900.01.T01, FtPinG0004712400.01.T01, FtPinG0002969500.01.T01…
Phenylpropanoid biosynthesis	Metabolism	20	497	285	12990	0.00672031	1.83416	[FtPinG0000754400.01.T01, FtPinG0000929100.01.T01, FtPinG0003957300.01.T01, FtPinG0008141200.01.T01, FtPinG0002505300.01.T01, FtPinG0007810900.01.T01, FtPinG0004087700.01.T01, FtPinG0008704000.01.T01, FtPinG0009113600.01.T01, FtPinG0006020500.01.T01, FtPinG0003135700.01.T01, FtPinG0003080000.01.T01, FtPinG0009459200.01.T01, FtPinG0002517900.01.T01, FtPinG0008157100.01.T01, FtPinG0004712400.01.T01…
alpha-Linolenic acid metabolism	Metabolism	9	497	99	12990	0.0134448	2.37607	[FtPinG0002952800.01.T01, FtPinG0005159300.01.T01, FtPinG0005416000.01.T01, FtPinG0009495000.01.T01, FtPinG0006663000.01.T01, FtPinG0008408200.01.T01, FtPinG0001471200.01.T01, FtPinG0005416800.01.T01, FtPinG0002376500.01.T01]
Flavonoid biosynthesis	Metabolism	8	497	87	12990	0.0180646	2.40339	[FtPinG0008704000.01.T01, FtPinG0009113600.01.T01, FtPinG0003080000.01.T01, FtPinG0002428800.01.T01, FtPinG0002371500.01.T01, FtPinG0009375700.01.T01, FtPinG0006586600.01.T01, FtPinG0003453100.01.T01]
Alanine, aspartate and glutamate metabolism	Metabolism	7	497	71	12990	0.0185511	2.57687	[FtPinG0001337300.01.T01, FtPinG0003106800.01.T01, FtPinG0001879900.01.T01, FtPinG0001258700.01.T01, FtPinG0009366300.01.T01, FtPinG0008184600.01.T01, FtPinG0007428900.01.T01]
Enzymes with EC numbers	Not Included in Pathway or Brite	27	497	464	12990	0.0200966	1.52089	[FtPinG0008390000.01.T01, FtPinG0000534800.01.T01, FtPinG0004805400.01.T01, FtPinG0006166100.01.T01, FtPinG0003855800.01.T01, FtPinG0005877700.01.T01, FtPinG0009754700.01.T01, FtPinG0003645700.01.T01, FtPinG0004357900.01.T01, FtPinG0008195500.01.T01, FtPinG0006102500.01.T01, FtPinG0007472100.01.T01, FtPinG0001976400.01.T01, FtPinG0002517900.01.T01, FtPinG0006663000.01.T01, FtPinG0001386800.01.T01…
CD molecules	Brite Hierarchies	5	497	43	12990	0.0233706	3.03917	[FtPinG0005659600.01.T01, FtPinG0009743300.01.T01, FtPinG0006482800.01.T01, FtPinG0009525500.01.T01, FtPinG0005348800.01.T01]
Environmental Information Processing	Environmental Information Processing	38	497	716	12990	0.0253865	1.38715	[FtPinG0004414300.01.T01, FtPinG0005659600.01.T01, FtPinG0009283700.01.T01, FtPinG0002942600.01.T01, FtPinG0009525500.01.T01, FtPinG0001040500.01.T01, FtPinG0005526700.01.T01, FtPinG0009754700.01.T01, FtPinG0005743200.01.T01, FtPinG0000634000.01.T01, FtPinG0008023100.01.T01, FtPinG0006482800.01.T01, FtPinG0003085100.01.T01, FtPinG0005738100.01.T01, FtPinG0008563700.01.T01, FtPinG0001642100.01.T01…
Carbohydrate metabolism	Metabolism	57	497	1153	12990	0.0262463	1.29211	[FtPinG0007242500.01.T01, FtPinG0008627600.01.T01, FtPinG0000987900.01.T01, FtPinG0001479500.01.T01, FtPinG0000270200.01.T01, FtPinG0009443700.01.T01, FtPinG0007127500.01.T01, FtPinG0004078200.01.T01, FtPinG0006102500.01.T01, FtPinG0002342600.01.T01, FtPinG0007126900.01.T01, FtPinG0003540000.01.T01, FtPinG0005738100.01.T01, FtPinG0007470100.01.T01, FtPinG0001701800.01.T01, FtPinG0003555100.01.T01…
Stilbenoid, diarylheptanoid and gingerol biosynthesis	Metabolism	6	497	60	12990	0.026638	2.61368	[FtPinG0008704000.01.T01, FtPinG0009113600.01.T01, FtPinG0003080000.01.T01, FtPinG0009375700.01.T01, FtPinG0006586600.01.T01, FtPinG0003453100.01.T01]
Plant hormone signal transduction	Environmental Information Processing	24	497	415	12990	0.0291301	1.51153	[FtPinG0004414300.01.T01, FtPinG0008563700.01.T01, FtPinG0001642100.01.T01, FtPinG0007968400.01.T01, FtPinG0002474100.01.T01, FtPinG0007969000.01.T01, FtPinG0000683600.01.T01, FtPinG0007581000.01.T01, FtPinG0001619100.01.T01, FtPinG0001040500.01.T01, FtPinG0005526700.01.T01, FtPinG0005142100.01.T01, FtPinG0009754700.01.T01, FtPinG0008442000.01.T01, FtPinG0005743200.01.T01, FtPinG0000634000.01.T01…
Metabolism of other amino acids	Metabolism	18	497	290	12990	0.0301191	1.62229	[FtPinG0000754400.01.T01, FtPinG0001701800.01.T01, FtPinG0000987900.01.T01, FtPinG0000806900.01.T01, FtPinG0006850800.01.T01, FtPinG0002505300.01.T01, FtPinG0009243900.01.T01, FtPinG0007743500.01.T01, FtPinG0006443300.01.T01, FtPinG0006416700.01.T01, FtPinG0000533700.01.T01, FtPinG0002517900.01.T01, FtPinG0001879900.01.T01, FtPinG0002459200.01.T01, FtPinG0000689100.01.T01, FtPinG0003300200.01.T01…
Membrane transport	Environmental Information Processing	7	497	79	12990	0.0312541	2.31592	[FtPinG0005659600.01.T01, FtPinG0009743300.01.T01, FtPinG0006482800.01.T01, FtPinG0009525500.01.T01, FtPinG0005348800.01.T01, FtPinG0006416500.01.T01, FtPinG0006219700.01.T01]
ABC transporters	Environmental Information Processing	7	497	79	12990	0.0312541	2.31592	[FtPinG0005659600.01.T01, FtPinG0009743300.01.T01, FtPinG0006482800.01.T01, FtPinG0009525500.01.T01, FtPinG0005348800.01.T01, FtPinG0006416500.01.T01, FtPinG0006219700.01.T01]
Metabolism of terpenoids and polyketides	Metabolism	19	497	313	12990	0.0321251	1.58658	[FtPinG0000754400.01.T01, FtPinG0000614800.01.T01, FtPinG0001701800.01.T01, FtPinG0004788100.01.T01, FtPinG0000987900.01.T01, FtPinG0006714900.01.T01, FtPinG0008935100.01.T01, FtPinG0004109300.01.T01, FtPinG0003140900.01.T01, FtPinG0007162900.01.T01, FtPinG0004787900.01.T01, FtPinG0000416800.01.T01, FtPinG0008069400.01.T01, FtPinG0007345500.01.T01, FtPinG0008590800.01.T01, FtPinG0002387400.01.T01…
Unclassified: metabolism	Not Included in Pathway or Brite	29	497	528	12990	0.0322209	1.43555	[FtPinG0008390000.01.T01, FtPinG0000534800.01.T01, FtPinG0004805400.01.T01, FtPinG0006166100.01.T01, FtPinG0003855800.01.T01, FtPinG0005877700.01.T01, FtPinG0009754700.01.T01, FtPinG0003645700.01.T01, FtPinG0004357900.01.T01, FtPinG0008195500.01.T01, FtPinG0006102500.01.T01, FtPinG0007472100.01.T01, FtPinG0001976400.01.T01, FtPinG0002517900.01.T01, FtPinG0006663000.01.T01, FtPinG0007957900.01.T01…
beta-Alanine metabolism	Metabolism	6	497	64	12990	0.0351665	2.45033	[FtPinG0000754400.01.T01, FtPinG0001701800.01.T01, FtPinG0000987900.01.T01, FtPinG0000689100.01.T01, FtPinG0003300200.01.T01, FtPinG0007428900.01.T01]
Porphyrin and chlorophyll metabolism	Metabolism	6	497	65	12990	0.0375435	2.41263	[FtPinG0005791300.01.T01, FtPinG0007078100.01.T01, FtPinG0008840400.01.T01, FtPinG0002435600.01.T01, FtPinG0002562700.01.T01, FtPinG0000762500.01.T01]
