# Supplementary material for: Comparative physiological, transcriptomic, and WGCNA analyses reveal the key genes and regulatory pathways associated with drought tolerance in Tartary buckwheat
Source: Front Plant Sci. 2022 Oct 3;13:985088. doi: 10.3389/fpls.2022.985088 (PMC9575659; doi:10.3389/fpls.2022.985088)
Supplement: Supplementary file 7 [file Table_5.xlsx]

## Sheet: Sheet1
Table S5 Transcription factors (TFs) in the 851core drought-resistance genes in XZSN
Gene ID	TF Family	Name	Log2 fold change (LK5_vs_XZ5)	Log2 fold change (XZ0_vs_XZ5)	Log2 fold change (LK0_vs_LK5)	Log2 fold change (XZ0_vs_XZ7)	Log2 fold change (LK0_vs_LK7)	Module	Best-Hit-A.th	Symbol	Function
FtPinG0000334100.01	bHLH	bHLH-1	2.11	3.87	NA	NA	NA	turquoise	AT4G00870.1	bHLH14
FtPinG0002336700.01	bHLH	bHLH-2	2.59	2.97	NA	1.12	2.96	blue	AT3G47640.2	PYE
FtPinG0002267300.01	bHLH	bHLH-3	1.42	3.28	1.71	NA	3.56	turquoise	AT1G61660.3	bHLH112	Salt stress resisting
FtPinG0000281400.01	bHLH	bHLH-4	5.03	7.3	NA	NA	7.06	blue	AT4G00050.1
FtPinG0009423600.01	bZIP	bZIP-1	5.53	6.56	NA	1.32	3.98	turquoise	AT2G18160.1
FtPinG0003196200.01	bZIP	bZIP-2	4.55	7.98	3.4	3.07	6.6	yellow	AT1G45249.1	AtABF2/FtbZIP5	Drought resisting
FtPinG0002143600.01	bZIP	bZIP-3	2.95	4.44	NA	2.44	3.32	brown	AT1G45249.1	AtABF2/FtbZIP83	Drought resisting
FtPinG0000068200.01	bZIP	bZIP-4	2.01	7.11	5.28	NA	NA	turquoise	AT1G19490.1	bZIP62	Response to water deprivation
FtPinG0002136200.01	bZIP	bZIP-5	2.45	4.35	3.61	NA	4.94	yellow	AT1G75390.2
FtPinG0004759200.01	bZIP	bZIP-6	6.42	7.83	NA	NA	4.95	blue	AT5G11260.1	HY5	Response to dehydration
FtPinG0003310400.01	C3H	C3H-1	Inf	7.75	NA	NA	Inf	blue	AT1G03790.1
FtPinG0002724600.01	C3H	C3H-2	1.03	1.77	NA	NA	NA	turquoise	AT2G16485.1
FtPinG0003915400.01	C3H	C3H-3	1.12	2.09	NA	NA	NA	turquoise	AT3G19360.1
FtPinG0005027800.01	CPP	CPP	1.33	1.81	NA	NA	NA	turquoise	AT4G29000.1
FtPinG0003023300.01	ERF	ERF-1	2.12	2.36	NA	NA	1.83	brown	AT1G64380.1
FtPinG0007401700.01	ERF	ERF-2	3.37	4.16	NA	NA	5.09	blue	AT2G33710.1
FtPinG0009356100.01	G2-like	G2-like-1	2.4	3.25	NA	1.1	2.7	blue	AT4G37180.1
FtPinG0007007100.01	G2-like	G2-like-2	2.71	1.58	NA	NA	2.55	blue	AT1G68670.1	HHO2	Nutrition stress
FtPinG0005918800.01	G2-like	G2-like-3	1.84	3.14	NA	NA	3.4	blue	AT1G68670.1	HHO2	Nutrition stress
FtPinG0003050700.01	GATA	GATA	1.99	3.47	1.08	NA	1.95	turquoise	AT4G26150.1
FtPinG0005747400.01	GeBP	GeBP	1.22	1.84	NA	NA	1.83	blue	AT5G28040.1
FtPinG0006602200.01	GRAS	GRAS	1.58	4.62	1.89	NA	2.16	yellow	AT1G63100.1
FtPinG0009370500.01	GRF	GRF	2.64	2.29	NA	NA	2.89	blue	AT4G37740.1
FtPinG0001748800.01	HD-ZIP	HD-ZIP-1	2.6	5.31	2.04	2.68	3.93	brown	AT2G46680.1
FtPinG0004666000.01	HD-ZIP	HD-ZIP-2	1.82	3.32	NA	1.83	2.1	yellow	AT3G01470.1	ATHB1	Response to salt stress
FtPinG0001027400.01	HD-ZIP	HD-ZIP-3	3.3	5.14	NA	NA	3.27	brown	AT5G06710.1
FtPinG0007473900.01	HD-ZIP	HD-ZIP-4	1.58	4.1	NA	2..21	2.22	blue	AT2G46680.1
FtPinG0001053400.01	HD-ZIP	HD-ZIP-5	2.38	1.58	NA	1.45	1.32	blue	AT1G69780.1	ATHB13	Drought resisting
FtPinG0000332400.01	HD-ZIP	HD-ZIP-6	3.02	4.24	NA	2.68	3.26	blue	AT2G46680.1
FtPinG0009369600.01	HD-ZIP	HD-ZIP-7	1.62	1.89	NA	NA	2.4	blue	AT5G06710.1
FtPinG0007574700.01	HSF	HSF-1	4.06	4.06	NA	3.52	3.25	brown	AT3G22830.1
FtPinG0007888700.01	HSF	HSF-2	2.42	3.52	NA	NA	3.17	blue	AT3G24520.1
FtPinG0003045600.01	HSF	HSF-3	4.07	9.98	4.59	3.87	5.09	turquoise	AT2G26150.1	HSFA2	Response to heat stress and H2O2
FtPinG0001727900.01	HSF	HSF-4	1.25	3.94	2.31	NA	NA	turquoise	AT3G22830.1	HSFA6B	Response to osmotic stress
FtPinG0004037500.01	LBD	LBD	2.87	2.94	NA	NA	4.74	blue	AT1G07900.1
FtPinG0005485500.01	MADS	MADS-1	6.06	8.15	NA	5.11	9.19	blue	AT5G60910.1
FtPinG0001785400.01	MADS	MADS-2	1.39	1.65	NA	NA	NA	turquoise	AT2G03710.3
FtPinG0002272200.01	MYB	MYB-1	4.47	5.69	2.8	3.82	7.1	brown	AT4G21440.1	MYB102	Response to osmotic stress
FtPinG0009424400.01	MYB	MYB-2	3.48	4.83	3.52	NA	4.74	turquoise	AT5G16600.1
FtPinG0007044900.01	MYB	MYB-3	5.71	9.64	NA	4.05	5.51	turquoise	AT1G79180.1
FtPinG0001302000.01	MYB	MYB-4	Inf	Inf	NA	Inf	6.89	blue	AT3G52250.1
FtPinG0007062500.01	MYB	MYB-5	2.72	2.22	NA	NA	2.07	brown	AT5G04760.1
FtPinG0003266100.01	MYB	MYB-6	1.85	6.6	3.57	NA	4.67	yellow	AT1G48000.1	MYB112	Response to salt stress
FtPinG0008794300.01	MYB	MYB-7	3.73	3.85	NA	2.65	3.39	blue	AT4G34990.1	MYB32	Response to drought stress
FtPinG0005799200.01	MYB_related	MYB_related-1	1.75	1.53	NA	NA	1,53	brown	AT1G19000.1
FtPinG0009700500.01	MYB_related	MYB_related-2	2.04	1.71	NA	2.05	2.13	blue	AT3G16350.1
FtPinG0005108300.01	NAC	NAC-1	5.74	7.11	NA	3.31	5.68	yellow	AT5G39820.1
FtPinG0006563600.01	NAC	NAC-2	5.63	2.34	NA	NA	2.52	yellow	AT1G01720.1	ANAC2	Response to salt stress
FtPinG0002173200.01	NAC	NAC-3	6.54	10.46	NA	NA	2.99	turquoise	AT4G27410.2	ANAC072/RD26	Drought resisting
FtPinG0004997500.01	NAC	NAC-4	4.68	7.09	NA	NA	4.32	turquoise	AT1G69490.1
FtPinG0005406300.01	NAC	NAC-5	2.84	3.22	NA	2.38	1.7	blue	AT5G64530.1
FtPinG0007173800.01	NAC	NAC-6	1.45	2.22	NA	NA	1.95	blue	AT2G27300.1
FtPinG0005875600.01	NAC	NAC-7	3.87	5.28	NA	NA	7.72	blue	AT5G64530.1
FtPinG0002561000.01	NAC	NAC-8	2.4	4.35	1.93	NA	2.38	turquoise	AT1G52890.1	ANAC019	Drought resisting
FtPinG0009519600.01	NAC	NAC-9	1.37	1.83	NA	NA	1.72	blue	AT5G07680.2	NAC4	Response to salt stress
FtPinG0005791100.01	NAC	NAC-10	2.46	4.56	NA	NA	1.97	yellow	AT4G27410.2	ANAC072/RD26	Drought resisting
FtPinG0006087500.01	NAC	NAC-11	2.59	3.7	NA	NA	NA	brown	AT1G69490.1	NAC029	Drought resisting
FtPinG0005167000.01	NAC	NAC-12	1.35	2.33	NA	1.92	2.24	brown	AT1G01720.1	ANAC2	Drought resisting
FtPinG0007718300.01	NF-YA	NF-YA-1	1.62	2.48	NA	NA	NA	turquoise	AT5G12840.1	NF-YA1	Response to salt stress
FtPinG0002960300.01	NF-YA	NF-YA-2	1.14	2.56	1.42	NA	NA	turquoise	AT5G12840.2
FtPinG0001323400.01	TALE	TALE	1.12	4.66	NA	3.24	NA	turquoise	AT1G23380.1
FtPinG0007458900.01	WRKY	WRKY-1	2.3	3.5	NA	1.32	2.37	brown	AT2G47260.1
FtPinG0002142900.01	WRKY	WRKY-2	1.96	2.13	NA	NA	2.76	brown	AT4G24240.1	AtWRKY7	Response to abiotic stress
FtPinG0007629700.01	WRKY	WRKY-3	4.38	2.09	NA	NA	3.69	blue	AT4G11070.1	WRKY41	Response to heat stress
FtPinG0001770900.01	WRKY	WRKY-4	3.87	3.87	NA	1.4	4.46	blue	AT1G29860.1	WRKY71	Response to heat stress
FtPinG0003193100.01	WRKY	WRKY-5	1.63	3.6	NA	NA	NA	turquoise	AT4G24240.1	AtWRKY7	Response to abiotic stress
Note: NA, Log2 fold change < 1; Inf, no expression value in LK5 or XZ0.
