# Supplementary material for: Comparative physiological, transcriptomic, and WGCNA analyses reveal the key genes and regulatory pathways associated with drought tolerance in Tartary buckwheat
Source: Front Plant Sci. 2022 Oct 3;13:985088. doi: 10.3389/fpls.2022.985088 (PMC9575659; doi:10.3389/fpls.2022.985088)
Supplement: Supplementary file 8 [file Table_6.xlsx]

## Sheet: Sheet1
Table S6 ABA response genes in the 861core drought-resistance genes in XZSN
	Gene ID	Log2 fold change (LK5_vs_XZ5)	Log2 fold change (XZ0_vs_XZ5)	Log2 fold change (LK0_vs_LK5)	Log2 fold change (XZ0_vs_XZ7)	Log2 fold change (LK0_vs_LK7)	Module	Best-Hit-A.th	Symbol	Annotation	Stress Response
ABA biosynthesis	FtPinG0007754400.01	1.95	2.72	NA	NA	1.29	yellow	AT5G67030.1	ZEP/ABA	zeaxanthin epoxidase	heat stress, osmotic stress, red light
	FtPinG0003131500.01	2.99	4.98	NA	4.01	4.97	blue	AT3G14440.1	NCED3	9-cis-epoxycarotenoid dioxygenase	salt stress, osmotic stress, water deprivation
	FtPinG0000246400.01	2.77	3.95	1.84	2.42	5.03	blue	AT3G14440.1	NCED3	9-cis-epoxycarotenoid dioxygenase	salt stress, osmotic stress, water deprivation
ABAsignal transduction	FtPinG0007802700.01	1.41	4.74	2.92	2.46	1.17	turquoise	AT4G17870.1	PYR1/RCAR11	ABA receptor	drought stress
	FtPinG0006346100.01	4.72	4.72	NA	2.07	2.52	yellow	AT2G29380.1	HAI3	highly ABA-induced PP2C protein 3	drought stress, osmotic stress
	FtPinG0009574600.01	2.79	3.73	NA	1.80	3.13	blue	AT2G29380.1	HAI3	highly ABA-induced PP2C protein 3	drought stress, osmotic stress
	FtPinG0000399000.01	3.31	4.26	1.04	1.01	3.76	brown	AT3G62260.2	PP2C49	Type 2C protein phosphatase	salt stress
	FtPinG0003403400.01	1.49	2.36	NA	NA	4.13	blue	AT4G31750.1	WIN2	Protein phosphatase 2C	bacterium
	FtPinG0003981600.01	2.98	4.23	NA	3.32	2.69	blue	AT4G33950.1	OST1/SNRK2.6	calcium-independent ABA-activated protein kinase	osmotic stress, salt stress, water deprivation,
	FtPinG0003196200.01	4.55	7.98	3.40	3.07	6.60	yellow	AT1G45249.3	ABF2	bZIP transcription factor	salt stress, water deprivation
	FtPinG0002143600.01	2.95	4.44	NA	2.44	3.32	brown	AT1G45249.3	ABF2	bZIP transcription factor	salt stress, water deprivation
ABA response	FtPinG0000294900.01	1.45	3.53	NA	1.33	NA	turquoise	AT2G45640.1	SAP18	co-suppressors	salt, cold, drought stresses
	FtPinG0000332400.01	3.02	4.24	NA	2.68	3.26	blue	AT2G46680.1	ATHB7	HD-ZIP transcription factor	drought stress
	FtPinG0001748800.01	2.6	5.31	2.04	2.66	3.93	brown	AT2G46680.1	ATHB7	HD-ZIP transcription factor	drought stress
	FtPinG0007473900.01	1.58	4.1	NA	2.21	2.22	blue	AT2G46680.1	ATHB7	HD-ZIP transcription factor	drought stress
	FtPinG0000532800.01	1.31	2.12	NA	1.14	1.81	brown	AT3G01770.1	BET10	bromodomain and extraterminal-domain proteins
	FtPinG0000544600.01	4.6	4.04	NA	NA	4.50	brown	AT4G31910.1	BAT1	acyltransferase
	FtPinG0000771500.01	2.57	1.69	NA	NA	1.76	brown	AT2G33590.1	CRL1	dihydroflavonol-4-reductase	heat, drought stresses
	FtPinG0002267300.01	1.42	3.28	1.71	NA	1.83	turquoise	AT1G61660.3	bHLH112	bHLH transcription factor	salt stress, water deprivation
	FtPinG0000986400.01	1.16	3.72	2.48	1.14	1.84	turquoise	AT3G08040.1	FRD3	Encodes a member of the MATE (multidrug and toxin efflux family)	phosphate starvation
	FtPinG0001022300.01	3.63	3.8	NA	1.18	4.31	blue	AT5G59310.1	LTP4	Encodes a member of the lipid transfer protein family	salt, drought stresses
	FtPinG0001235200.01	2.38	3.92	1.83	NA	2.54	turquoise	AT3G48360.1	BT2	BTB-domain protein	cold, salt, wounding, hydrogen peroxide
	FtPinG0001405800.01	2.55	4.48	1.94	NA	2.76	turquoise	AT1G20440.1	RD17/COR47	dehydrin protein	osmotic, cold, heat, drought stresses
	FtPinG0001471600.01	2.31	2.09	NA	NA	2.09	brown	AT1G54100.1	ALDH7B4	Aldehyde dehydrogenase	salt, drought stresses
	FtPinG0001721200.01	8.43	Inf	NA	NA	Inf	turquoise	AT3G22490.1	RAB28	Late embryogenesis-abundant (Lea) proteins	cold, salt, drought stresses
	FtPinG0001750400.01	3.64	2.51	NA	NA	2.38	turquoise	AT1G64670.1	CED1	alpha-beta hydrolase	osmotic, drought stresses
	FtPinG0001727900.01	1.25	3.94	2.31	NA	NA	turquoise	AT3G22830.1	HSFA6B	HSF transcription factor	osmotic stress, heat stress
	FtPinG0002120800.01	6.38	5.88	NA	NA	7.11	blue	AT5G01540.1	LECRKA4.1	a member of the lectin receptor kinase subfamily A4	bacterium
	FtPinG0002265300.01	1.63	1.76	NA	NA	NA	turquoise	AT3G28210.1	SAP12	zinc finger protein/stress-associated protein	salt, cold stresses
	FtPinG0002272200.01	4.47	5.69	2.80	2.85	7.10	brown	AT4G21440.1	MYB102	R2R3 MYB transcription factor	wounding, osmotic stresses
	FtPinG0002370000.01	1.98	3.32	1.15	NA	1.43	turquoise	AT1G56600.1	GolS2	galactinol synthase	oxidative, cold, salt, drought stresses
	FtPinG0002430900.01	4.03	3.3	1.05	NA	3.58	turquoise	AT3G20470.1	GRP5	glycine-rich protein	flooding
	FtPinG0002937900.01	2.59	5.97	2.19	NA	1.84	turquoise	AT1G62660.1	VI1	Glycosyl hydrolases family 32 protein	bacterium, salt stress, water deprivation,
	FtPinG0003141900.01	3.2	6.13	2.16	3.36	4.51	brown	AT1G13740.1	AFP2	Encodes a member of a small plant-specific gene family whose members interact with ABI5 and appear to be involved in mediating stress responses	drought stress
	FtPinG0003146200.01	2.25	3.7	NA	NA	NA	yellow	AT5G50600.1	HSD1	hydroxysteroid dehydrogenase
	FtPinG0003146400.01	7.66	11.37	3.16	NA	9.93	yellow	AT5G50600.1	HSD1	hydroxysteroid dehydrogenase
	FtPinG0003266100.01	1.85	6.6	3.57	NA	4.67	yellow	AT1G48000.1	MYB112	MYB transcription factor	high light stress
	FtPinG0008794300.01	3.73	3.85	NA	2.65	3.39	blue	AT4G34990.1	MYB32	MYB transcription factor	drought stress
	FtPinG0003448100.01	1.32	1.97	NA	NA	1.32	brown	AT2G33380.1	CLO3	calcium binding protein	cold,drought,fungus, salt stresses
	FtPinG0004216200.01	2.66	1.79	NA	NA	NA	turquoise	AT5G02240.1
	FtPinG0004388600.01	1.52	2.06	NA	NA	1.35	yellow	AT2G15970.1	ATCYP19	an alpha form of a protein similar to the cold acclimation protein	cold, drought stresses
	FtPinG0004404700.01	7.37	8.99	NA	3.07	9.35	brown	AT2G21490.1	LEA	Late embryogenesis-abundant (Lea) proteins	cold, drought stresses
	FtPinG0004465400.01	6.26	Inf	NA	NA	6.91	yellow	AT1G05510.1	OBAP1a
	FtPinG0004759200.01	6.42	7.83	NA	NA	4.95	blue	AT5G11260.1	HY5	bZIP transcription factor	UV-B
	FtPinG0004833600.01	3.38	3.1	NA	NA	3.59	brown	AT5G59310.1	LTP4	lipid transfer protein	salt, drought stresses
	FtPinG0004870600.01	4.52	Inf	NA	Inf	5.09	blue	AT4G25580.1		CAP160 protein	heat, drought stresses
	FtPinG0005419000.01	6.7	10.09	NA	3.17	9.24	blue	AT2G21490.1	LEA	Late embryogenesis-abundant (Lea) proteins	cold, drought stresses
	FtPinG0005618800.01	1.32	3.51	NA	NA	NA	turquoise	AT3G26830.1	CYP71B15	cytochrome P450 enzyme	bacterium,insect,water deprivation
	FtPinG0005791100.01	2.46	4.56	NA	NA	1.97	yellow	AT4G27410.3	RD26/ANAC072	NAC transcription factor	drought stress
	FtPinG0006563600.01	5.63	2.34	NA	NA	2.52	yellow	AT1G01720.1	ATAF1/ANAC002	NAC transcription factor	wounding
	FtPinG0002173200.01	6.54	10.46	NA	NA	2.99	turquoise	AT4G27410.2	RD26/ANAC072	NAC transcription factor	drought stress
	FtPinG0002561000.01	2.4	4.35	1.93	NA	2.38	turquoise	AT1G52890.1	ANAC019	NAC transcription factor	salt stress, drought stress
	FtPinG0005167000.01	1.35	2.33	NA	1.92	2.24	brown	AT1G01720.1	ANAC2	NAC transcription factor	wounding
	FtPinG0005801500.01	1.05	3.1	2.56	NA	1.78	turquoise	AT1G09950.1	RAS1		salt stress
	FtPinG0006021400.01	7.26	Inf	NA	Inf	5.95	turquoise	AT3G05880.1	RCI2A	small (54 amino acids), highly hydrophobic protein	salt, clod stresses
	FtPinG0006421500.01	1.19	2.36	NA	NA	NA	turquoise	AT5G45820.1	CIPK20	CBL-interacting serine/threonine protein kinase	osmotic stress
	FtPinG0006640900.01	1.4	1.93	NA	NA	NA	turquoise	AT4G38630.1	MBP1	Regulatory particle non-ATPase subunit of the 26S proteasome with multiubiquitin-chain-binding capabilities	heat, salt stresses
	FtPinG0006680200.01	2.11	1.96	NA	NA	2.12	blue	AT5G63110.1	HDA6	RPD3-like histone deacetylase	salt stress
	FtPinG0006978500.01	4.08	6.39	2.04	1.27	2.85	turquoise	AT1G15520.1	ABCG36	ABC transporter	cold, heat, drought stresses
	FtPinG0007007100.01	2.71	1.58	NA	NA	2.55	blue	AT1G68670.1	HHO2	G2-like transcription factors	nutrient stress
	FtPinG0005918800.01	1.84	3.14	NA	NA	3.40	blue	AT1G68670.1	HHO3	G2-like transcription factors	nutrient stress
	FtPinG0007062500.01	2.72	2.22	NA	NA	2.07	brown	AT5G04760.1	DIV2	R-R-type MYB transcription factors	salt stress
	FtPinG0007401700.01	3.37	4.16	NA	NA	5.09	blue	AT1G43160.1	RAP2.6/ERF113	ERF transcription factors	cold, osmotic stress, salt stress, water deprivation, wounding
	FtPinG0007461700.01	3.14	6.58	2.38	2.31	2.74	turquoise	AT1G56600.1	GolS2	galactinol synthase	cold, oxidative stress, salt stress, water deprivation
	FtPinG0007718300.01	1.62	2.48	NA	NA	NA	turquoise	AT5G12840.1	NF-YA1	NF-YA transcription factors	salt, drought stresses
	FtPinG0002960300.01	1.14	2.56	1.42	NA	NA	turquoise	AT5G12840.2	NF-YA1	NF-YA transcription factors	salt, drought stresses
	FtPinG0007575900.01	2.08	1.4	NA	NA	1.12	brown	AT3G22850.1		aluminum induced protein with YGL and LRDR motifs
	FtPinG0007962000.01	2.13	4.66	2.52	NA	3.44	yellow	AT4G34710.1	ADC2	arginine decarboxylase	cold, osmotic stress, oxidative stress, salt stress, wounding
	FtPinG0008258600.01	1.95	3.4	NA	NA	2.56	yellow	AT2G36690.1	GAS2	Fe-dependent 2-oxoglutarate dioxygenase
	FtPinG0008416400.01	1.45	2.28	1.29	1.15	1.87	yellow	AT5G40390.1	RS5	brassinosteroid-signaling kinase protein	oxidative stress, water deprivation,
	FtPinG0008534800.01	3.13	3.07	NA	1.25	1.32	yellow	AT5G27420.1	CNI1	RING type ubiquitin ligase	bacterium
	FtPinG0008935500.01	2.99	3.04	1.27	NA	4.67	blue	AT2G39800.1	P5CS1	delta1-pyrroline-5-carboxylate synthase	oxidative stress, salt stress, water deprivation
	FtPinG0009025300.01	1.45	1.91	NA	NA	1.08	yellow	AT5G58670.1	PLC1	phosphatidylinositol-specific phospholipase C	cold, salt stress, water deprivation
	FtPinG0009175100.01	1.93	2.24	NA	NA	3.01	blue	AT4G38470.1	STY46	Serine/threonine kinase	salt, osmotic stresses
	FtPinG0009369600.01	1.62	1.89	NA	NA	2.03	blue	AT4G37790.1	HAT22	HD-ZIP transcription factor	water deprivation
	FtPinG0009384500.01	1.05	6.44	NA	5.10	NA	yellow	AT2G41870.1	REM4.2	Remorin proteins	salt stress, water deprivation
	FtPinG0009473100.01	1.96	2.08	1.38	NA	1.99	yellow	AT5G25610.1	RD22	dehydration 22	salt, drought stresses
	FtPinG0009617800.01	4.74	Inf	NA	Inf	5.65	blue	AT2G39550.1	GGB	beta subunit of geranylgeranyl transferase	water deprivation
	FtPinG0009743100.01	5.91	NA	NA	4.18	6.13	blue	AT3G63060.1	EDL3	F-box protein	osmotic stress, salt stress, water deprivation
	FtPinG0001770900.01	3.87	NA	5.18	1.40	4.46	blue	AT1G29860.1	WRKY71	WRKY transcription factors	oxidative stress, salt stress
	FtPinG0007948900.01	1.24	3.84	2.06	NA	1.96	yellow	AT2G39050.1	EULS3	Nucleocytoplasmic lectin	salt stress
	FtPinG0004923100.01	1.79	4.17	NA	NA	NA	turquoise	AT2G39050.1	EULS3	Nucleocytoplasmic lectin	salt stress
	FtPinG0007888700.01	2.42	3.43	NA	NA	3.17	blue	AT3G24520.1	HSFC1	HSF transcription factor	heat stress
	FtPinG0006100300.01	1.63	1.77	NA	NA	NA	yellow	AT2G33150.1	PKT3	peroxisomal 3-ketoacyl-CoA thiolases
	FtPinG0003197500.01	5.59	7.05	NA	NA	4.01	yellow	AT4G25000.1	AMY1	alpha-amylase	heat stress
	FtPinG0005752600.01	1.22	2.07	1.25	NA	NA	turquoise	AT5G58380.1	CIPK10	CBL-interacting protein kinase
	FtPinG0001209500.01	4.13	3.89	NA	NA	2.88	yellow	AT2G43900.1	5PTase12	5-inositol-phosphate phosphatase
	FtPinG0000470400.01	3.38	5.93	1.65	2.59	3.15	turquoise	AT1G24580.1		U-box superfamily protein
	FtPinG0008958400.01	2.07	3.13	NA	NA	1.59	turquoise	AT1G70670.1	CLO4	Stress-Responsive Caleosin-like Protein
	FtPinG0003996100.01	3.43	4.61	NA	2.26	3.59	brown	AT2G04240.1	XERICO		salt and osmotic stress
	FtPinG0000345400.01	1.77	2.53	NA	NA	1.42	yellow	AT4G04020.1	PGL35	Fibrillin precursor protein	cold stress
	FtPinG0005433500.01	1.62	4.49	NA	1.39	1.54	yellow	AT1G15100.1	RHA2A	RING-H2 finger protein	salt and osmotic stress
	FtPinG0005952600.01	3.07	4.56	1.33	1.32	3.63	yellow	AT5G27420.1	ATL31	Carbon/Nitrogen Insensitive1	bacterium
	FtPinG0000202400.01	2.73	1.39	NA	NA	1.31	brown	AT2G03440.1	NRP1	nodulin-related protein 1	bacterium, cold, heats tress
	FtPinG0001114500.01	2.41	2.12	NA	NA	2.79	blue	AT5G20270.1	HHP1	heptahelical transmembrane protein	salt and cold stress
	FtPinG0006839100.01	4.27	1.64	NA	NA	NA	yellow	AT3G02360.1	PGD2	6-phosphogluconate dehydrogenase
	FtPinG0008870900.01	1.26	2.61	1.46	NA	NA	turquoise	AT5G47710.1		Calcium-dependent lipid-binding protein
	FtPinG0003261200.01	1.44	2.05	NA	NA	NA	yellow	AT4G32250.1	KOC1	phosphorylates import receptor
	FtPinG0003296200.01	1.11	1.61	NA	3.28	3.07	blue	AT5G08100.1	ASPGA1	asparaginase A1
	FtPinG0004126900.01	1.39	2.09	NA	NA	NA	turquoise	AT3G20410.1	CPK9	calmodulin-domain protein kinase 9	drought, salt stress
	FtPinG0005087800.01	2.28	1.69	NA	NA	2.32	brown	AT1G64060.1	RBOHF
	FtPinG0004827100.01	2.27	2.84	NA	NA	1.89	yellow	AT3G51550.1	FER	receptor-like kinase
Note: NA, Log2 fold change < 1; Inf, no expression value in LK0 or LK5 or XZ0.
