# Supplementary material for: Comparative physiological, transcriptomic, and WGCNA analyses reveal the key genes and regulatory pathways associated with drought tolerance in Tartary buckwheat
Source: Front Plant Sci. 2022 Oct 3;13:985088. doi: 10.3389/fpls.2022.985088 (PMC9575659; doi:10.3389/fpls.2022.985088)
Supplement: Supplementary file 9 [file Table_7.xlsx]

## Sheet: Sheet1
Table S7 Signal molecule genes in the 851 core drought-resistance genes in XZSN
Biological process	Gene ID	Log2 fold change (LK5_vs_XZ5)	Log2 fold change (XZ0_vs_XZ5)	Log2 fold change (LK0_vs_LK5)	Log2 fold change (XZ0_vs_XZ7)	Log2 fold change (LK0_vs_LK7)	Module	Best-Hit-A.th	Symbol	Annotation
Carbon monoxide (CO) biosynthesis	FtPinG0003111900.01	1.18	1.61	NA	NA	NA	turquoise	AT2G26670.1	HO1	Heme oxygenase
Hydrogen sulfide (H2S) biosynthesis	FtPinG0008746700.01	1.27	6.24	NA	NA	NA	turquoise	AT4G14880.1	OAS-TL	Cytosolic O-acetylserine(thiol)lyase
Melatonin biosynthesis	FtPinG0005933600.01	2.5	7.6	NA	NA	2.49	blue	AT5G54160.1	COMT1	Caffeic acid/5-hydroxyferulic acid O-methyltransferase
