# Supplementary material for: Comparative physiological, transcriptomic, and WGCNA analyses reveal the key genes and regulatory pathways associated with drought tolerance in Tartary buckwheat
Source: Front Plant Sci. 2022 Oct 3;13:985088. doi: 10.3389/fpls.2022.985088 (PMC9575659; doi:10.3389/fpls.2022.985088)
Supplement: Supplementary file 10 [file Table_8.xlsx]

## Sheet: Sheet1
Table S8 Stomatal closure and cuticular wax biosynthesis and transport genes from the 851 core drought-resistance genes in XZSN
	Fuction	Gene ID	Log2 fold change (LK5_vs_XZ5)a	Log2 fold change (XZ0_vs_XZ5)	Log2 fold change (LK0_vs_LK5)	Log2 fold change (XZ0_vs_XZ7)	Log2 fold change (LK0_vs_LK7)	Module	Best-Hit-A.th or O.ryb	Symbol	Annotation
Stomatal closure genes	ABA- dependent	FtPinG0005717800.01	5.8	4.11	-	-	-	blue	Os03g0281900	RCN1/OsABCG5	ABC transporter
		FtPinG0008924300.01	1.63	2.25	-	-	2.04	brown	AT5G06530.2	ABCG22	ABC transporter
		FtPinG0005087800.01	2.28	3.19	-	-	2.19	brown	AT1G64060.1	RBOH F	NADPH/respiratory burst oxidase protein F
		FtPinG0008212700.01	2.66	14.14	-	-	-	turquoise	AT4G17970.1	ALMT12	Anion transporter
		FtPinG0007948900.01	1.24	3.84	3.18	-	1.96	yellow	AT2G39050.1	EULS3	Nucleocytoplasmic lectin
		FtPinG0004923100.01	1.79	4.17	-	-	-	turquoise	AT2G39050.1	EULS3	Nucleocytoplasmic lectin
	ABA- independent	FtPinG0009572900.01	1.57	2.81	-	-	1.02	brown	AT4G29130.1	HXK1	Hexokinase
		FtPinG0003092800.01	1.35	3.19	-	-	-	turquoise	AT5G02800.1	CDL1	Receptor-like cytoplasmic kinase
Cuticular wax biosynthesis and transport genes	Cuticular wax biosynthesis	FtPinG0009149300.01	2.48	1.5	-c	-	1.73	brown	AT2G47240.1	LACS1	Long chain acyl-CoA synthetase
		FtPinG0002362600.01	2.32	1.39	-	-	2.31	blue	AT1G01120.1	KCS1	β-Ketoacyl-coenzyme A synthase
		FtPinG0001353600.01	1.83	2.59	1.96	-	3.4	brown	AT1G68530.1	KCS6	β-Ketoacyl-coenzyme A synthase
		FtPinG0009084100.01	2.21	2.64	-	-	1.52	yellow	AT5G10480.3	HCD/PAS2	β-Hydroxyacylcoenzyme A dehydratase
		FtPinG0009513400.01	4.39	3.07	-	-	4.26	blue	AT1G02205.3	CER1	BAHD acyltransferase
		FtPinG0009513200.01	4.63	3.62	-	-	4.45	blue	AT1G02205.3	CER1	BAHD acyltransferase
		FtPinG0005880800.01	4.86	3.85	-	-	1.1	blue	AT5G57800.1	CER3/WAX2	Sterol desaturase
		FtPinG0005881100.01	4.55	3.75	-	-	8.14	blue	AT5G57800.1	CER3/WAX2	Sterol desaturase
		FtPinG0003238300.01	2.55	3.96	-	2.2	2.27	yellow	AT4G33790.1	CER4/FAR3	Alcohol-forming fatty acyl-CoA reductase
		FtPinG0003553500.01	2.67	2.48	-	-	1.4	yellow	AT5G37300.1	WSD1	Wax ester synthaseand diacylglycerol acyltransferase
	Wax transport	FtPinG0007956200.01	7.02	4.55	-		Inf f	yellow	AT3G43720.1	LTPG2	GPI-anchored lipid transfer protein
		FtPinG0003167000.01	1.55	1.34	-	-	1.09	blue	AT3G43720.1	LTPG2	GPI-anchored lipid transfer protein
