# Supplementary material for: Comparative physiological, transcriptomic, and WGCNA analyses reveal the key genes and regulatory pathways associated with drought tolerance in Tartary buckwheat
Source: Front Plant Sci. 2022 Oct 3;13:985088. doi: 10.3389/fpls.2022.985088 (PMC9575659; doi:10.3389/fpls.2022.985088)
Supplement: Supplementary file 11 [file Table_9.xlsx]

## Sheet: Sheet1
Table S9 Reactive oxygen species scavenging genes in the 851core drought-resistance genes in XZSN
		Gene ID	Log2 fold change (LK5_vs_XZ5)	Log2 fold change (XZ0_vs_XZ5)	Log2 fold change (LK0_vs_LK5)	Log2 fold change (XZ0_vs_XZ7)	Log2 fold change (LK0_vs_LK7)	Module	Best-Hit-A.th	Symbol	Annotation
Enzymatic components		FtPinG0002482700.01	2.22	5.77	4.02	NA	NA	turquoise	AT3G09640.1	APX2	Ascorbate peroxidase
		FtPinG0006668900.01	2.37	1.19	NA	NA	NA	turquoise	AT4G33420.1	PER47	Peroxidase
		FtPinG0006420900.01	1.41	1.36	NA	2.42	3.49	brown	AT5G05340.1	PRX52	Peroxidase
		FtPinG0001180500.01	7.78	7.71	NA	3.55	7.4	blue	AT5G41210.1	GSTT1	Glutathione S-transferase
		FtPinG0007994500.01	2.12	1.34	NA	1.38	3.51	brown	AT3G62760.1	GSTF13	Glutathione S-transferase
		FtPinG0002221300.01	2.96	5.01	1.53	2.36	NA	turquoise	AT3G03190.1	GSTF11	Glutathione S-transferase
Non-enzymatic components	Ascorbic acid biosynthesis	FtPinG0005517700.01	1.29	2.07	NA	1.5	1.9	blue	AT1G70730.1	PGM2	Phosphoglucomutase
		FtPinG0006479000.01	2.47	3.34	2.01	NA	1.65	turquoise	AT1G14520.1	MIOX1	Myo-inositol oxygenase
	Flavonoids biosynthesis	FtPinG0008145300.01	4.35	Inf	NA	NA	NA	turquoise	AT3G55120.1	CHI	Chalcone isomerase
		FtPinG0008251700.01	1.18	2.18	NA	NA	NA	turquoise	AT3G51240.1	F3H	Flavanone 3-hydroxylase
Note: NA, Log2 fold change < 1; Inf, no expression value in XZ0.
