# Supplementary material for: Comparative physiological, transcriptomic, and WGCNA analyses reveal the key genes and regulatory pathways associated with drought tolerance in Tartary buckwheat
Source: Front Plant Sci. 2022 Oct 3;13:985088. doi: 10.3389/fpls.2022.985088 (PMC9575659; doi:10.3389/fpls.2022.985088)
Supplement: Supplementary file 12 [file Table_10.xlsx]

## Sheet: Sheet1
Table S10 Osmotic adjustment genes in the 861core drought-resistance genes in XZSN
Class	Biological process	Gene ID	Log2 fold change (LK5_vs_XZ5)	Log2 fold change (XZ0_vs_XZ5)	Log2 fold change (LK0_vs_LK5)	Log2 fold change (XZ0_vs_XZ7)	Log2 fold change (LK0_vs_LK7)	Best-Hit-A.th	Module	Symbol	Annotation
Amino acid	Glutamine biosynthesis	FtPinG0008161600.01	2.02	3.77	NA	1.74	2.51	AT5G35630.1	brown	GLN2	Glutamine synthetase
	Glutamate biosynthesis	FtPinG0005865500.01	1.78	2.32	NA	NA	2.13	AT5G53460.1	blue	GLT1	Glutamate synthase
	Aspartate biosynthesis	FtPinG0003294300.01	1.25	1.77	NA	NA	NA	AT2G22250.1	blue	AAT	Aspartate aminotransferase
		FtPinG0004264900.01	2.98	3.67	NA	NA	3	AT5G19550.1	brown	AAT2	Aspartate aminotransferase
	Glycine biosynthesis	FtPinG0009549300.01	1.45	2.22	NA	NA	NA	AT2G38400.1	blue	AGT3	Alanine-glyoxylate aminotransferase
		FtPinG0005753100.01	1.33	3.1	1.58	NA	2.73	AT2G13360.1	brown	AGT1	Alanine-glyoxylate aminotransferase
	Cysteine biosynthesis	FtPinG0008746700.01	1.27	2.64	NA	NA	NA	AT4G14880.1	turquoise	OASA1	O-acetylserine(thiol)lyase
	Methionine biosynthesis	FtPinG0000180500.01	2.15	1.4	NA	NA	NA	AT1G80090.1	blue	CBSX4	Cystathionine β-lyase
	Valine, Leucin and Isoleucine biosynthesis	FtPinG0003181300.01	6.81	8.74	NA	5.52	6.32	AT1G50090.1	blue	BCAT7	Branched-chain amino acid transaminase
	Proline biosynthesis	FtPinG0001005900.01	1.68	1.94	NA	NA	NA	AT5G46180.1	yellow	DELTA-OAT	Ornithine delta-aminotransferase
		FtPinG0008935500.01	2.99	3.04	1.27	NA	4.67	AT3G55610.1	blue	P5CS2	Pyrroline-5-carboxylate synthetase
Polyamine	Polyamine biosynthesis	FtPinG0007962000.01	2.13	4.66	2.52	NA	3.44	AT2G16500.1	yellow	ADC1	Arginine decarboxylase
Soluble sugar	Sucrose biosynthesis	FtPinG0008844900.01	1.58	5.62	3.99	2.1	3.65	AT4G02280.1	turquoise	SUS3	Sucrose synthase
		FtPinG0008230700.01	1.67	3.03	NA	1.51	2.79	AT5G20830.1	blue	SUS1	Sucrose synthase
	Starch degradation	FtPinG0003197500.01	5.6	Inf	NA	NA	5.75	AT4G25000.1	yellow	AMY1	Alpha-amylase
		FtPinG0007588800.01	2.21	3.64	1.53	NA	2.07	AT3G23920.1	turquoise	BAM1	Beta-amylase
	Raffinose biosynthesis	FtPinG0001478700.01	2.01	7.41	5.64	1.71	4.76	AT4G39800.1	turquoise	MIPS1	Inositol-3-phosphate synthase
		FtPinG0007461700.01	3.14	6.58	2.38	2.31	2.74	AT2G47180.1	turquoise	GOLS1	Galactinol synthase
		FtPinG0002370000.01	1.98	3.32	1.15	NA	1.43	AT1G56600.1	turquoise	GOLS2	Galactinol synthase
		FtPinG0006247600.01	4.39	4.83	NA	1.83	2.35	AT3G57520.1	turquoise	RS2	Raffinose synthase
		FtPinG0008416400.01	1.45	2.28	1.29	1.15	1.87	AT5G40390.1	yellow	RS5	Raffinose synthase
Note: NA, Log2 fold change < 1; Inf, no expression value in XZ0.
