# Supplementary material for: Comparative physiological, transcriptomic, and WGCNA analyses reveal the key genes and regulatory pathways associated with drought tolerance in Tartary buckwheat
Source: Front Plant Sci. 2022 Oct 3;13:985088. doi: 10.3389/fpls.2022.985088 (PMC9575659; doi:10.3389/fpls.2022.985088)
Supplement: Supplementary file 13 [file Table_11.xlsx]

## Sheet: Sheet1
Table S11 LEA and HSP genes in the 861core drought-resistance genes in XZSN
Gene ID	Log2 fold change (LK5_vs_XZ5)	Log2 fold change (XZ0_vs_XZ5)	Log2 fold change (LK0_vs_LK5)	Log2 fold change (XZ0_vs_XZ7)	Log2 fold change (LK0_vs_LK7)	Module	Best-Hit-A.th	Symbol	Annotation
FtPinG0007955800.01	6.19	7.58	3.51	NA	6.12	turquoise	AT3G22490.1	RAB28	Late embryogenesis abundant protein
FtPinG0001721200.01	Inf	Inf	NA	NA	Inf	turquoise	AT3G22490.1	RAB28	Late embryogenesis abundant protein
FtPinG0003401000.01	8.51	Inf	NA	NA	6.58	blue	AT3G22490.2	RAB29	Late embryogenesis abundant protein
FtPinG0006725700.01	4.05	7.15	4.27	NA	3.37	turquoise	AT1G54050.1		Heat shock protein
FtPinG0003983600.01	3.87	5.17	NA	NA	NA	turquoise	AT4G25200.1	HSP23	Heat shock protein
FtPinG0003336400.01	7.15	10.69	3.28	NA	2.69	turquoise	AT4G27670.1	HSP21	Heat shock protein
FtPinG0009502500.01	4.25	9.76	4.16	1.85	1.67	turquoise	AT5G52640.1	HSP83	Heat shock protein
FtPinG0002238800.01	4.15	5.54	NA	NA	NA	turquoise	AT1G07400.1		Heat shock protein
Note: NA, Log2 fold change < 1; Inf, no expression value in LK5 or XZ0 or LK0.
